# Supplementary material
Source: Research Square preprint supplement (doi:10.21203/rs.3.rs-9591596/v1)
Supplement: Supplementary file 1 [file 49fabdd597eec7731cf9fee0.docx]

**Supplementary Information**

A phosphorylation-tunable phase separation switch orchestrates peptidoglycan synthesis with cell division in Streptococcus suis

Ping Chen1,3, Xinhui Jia1,3, Wenlu Li1,3, Yao Zhu1,Nenling Zhang2, Shenye Yu1,Guanghui Dang1, Wanjiang Zhang1, Gang Li1*, Siguo Liu1*, Yueling Zhang1*

3These authors contributed equally: Ping Chen, Xinhui Jia, Wenlu Li.

*Emails: zhangyueling@caas.cn; liusiguo@caas.cn; ligang@caas.cn.

This file includes:

Supplementary text

Figures S1 to S9

Table S1 to S4

SI References

**Supplementary Figures**

**
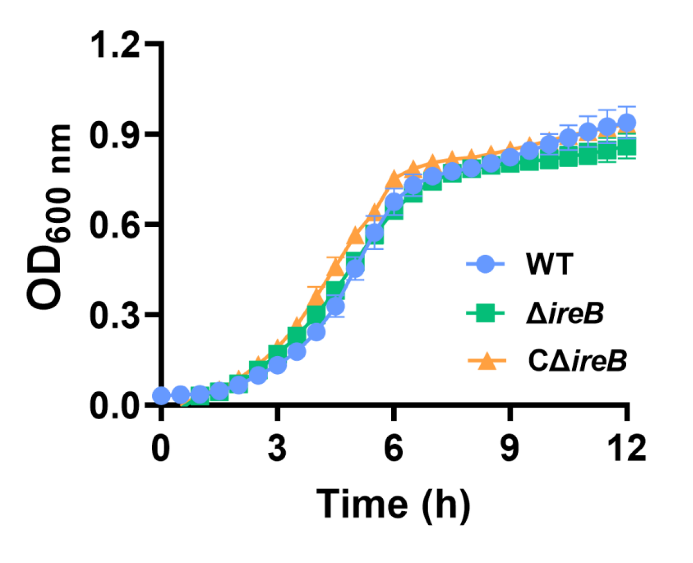
**

**Fig. S1 Deletion of *ireB* does not affect vegetative growth of *Streptococcus suis* in THY medium.** Growth curves of wild-type (WT), Δ*ireB*, and the complemented (CΔ*ireB*) strains in THY medium at 37 °C with 5% CO₂. Optical density at 600 nm (OD₆₀₀) was measured every 30 min. Data represent the mean ± SD of three biological replicates.


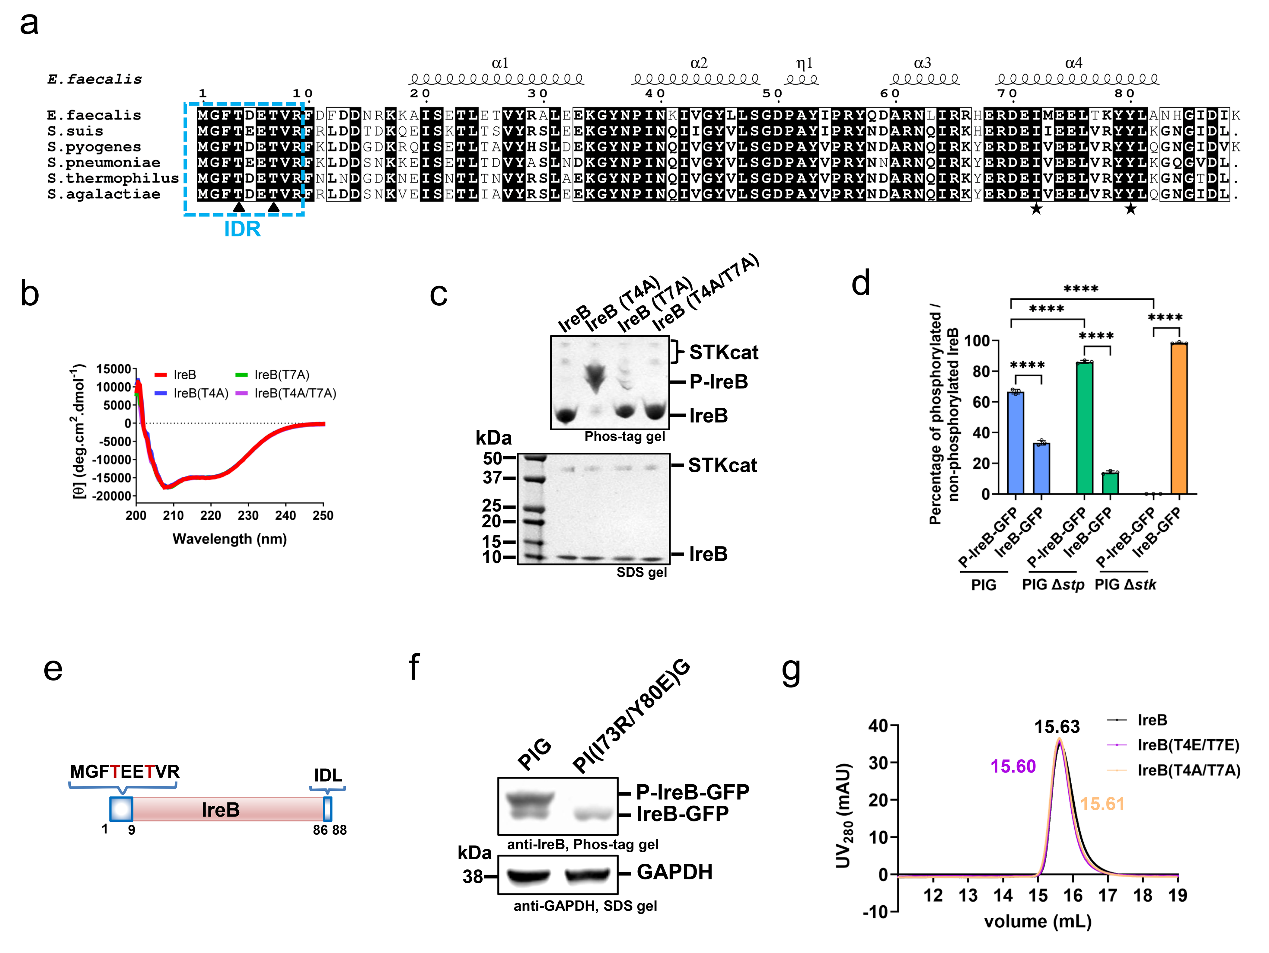


**Fig. S2 IreB sequence conservation and biochemical characterization. a** Multiple sequence alignment of IreB orthologs from the following Gram-positive bacteria: *Enterococcus faecalis* (AEA93661.1), *Streptococcus suis* (ABP89038.1), *S. pyogenes* (XIE74688.1), *S. pneumoniae* (WDT37045.1), *S. thermophilus* (AAV63471.1), and *S. agalactiae* (CAD47704.1). The N-terminal intrinsically disordered region (IDR) containing the conserved phosphorylation sites (Thr4, Thr7) is boxed. Phosphorylation sites and dimer interface residues (I73, Y80) are marked with triangles and stars, respectively. **b** Circular dichroism (CD) spectroscopy confirms that the indicated phosphosite mutants retain secondary structures similar to WT IreB. **c** In vitro phosphorylation assay of IreB phosphosite mutants by STKcat. The T4A mutant retains substantial phosphorylation, T7A shows residual phosphorylation, and the T4A/T7A double mutant is completely refractory to phosphorylation. **d** Quantification of phosphorylated and non-phosphorylated IreB-GFP pools from Fig. 2d. Band intensities were quantified by densitometry using ImageJ1. Data are mean ± SD from three independent experiments. ****P < 0.0001 (one-way ANOVA with Dunnett's correction). **e** Schematic of IreB showing CAID-predicted IDRs. Blue boxes highlight IDRs at the N-terminus (residues 1–9, containing Thr4 and Thr7) and C-terminus (residues 86–88), with the corresponding IDR sequences shown above. **f** In vivo phosphorylation analysis of the IreB(I73R/Y80E) mutant. Whole-cell lysates from WT and IreB(I73R/Y80E) strains were analyzed by Phos-tag and standard SDS-PAGE, followed by immunoblotting with the indicated antibodies. The dimerization-deficient mutant shows no phosphorylation. GAPDH was used as a loading control. **g** Size exclusion chromatography (SEC) of WT IreB, IreB(T4E/T7E), and IreB(T4A/T7A). Elution profiles (UV absorbance at 280 nm) are shown. WT IreB elutes as a dimer, as do IreB(T4E/T7E) and IreB(T4A/T7A). Source data are provided as a Source Data file.


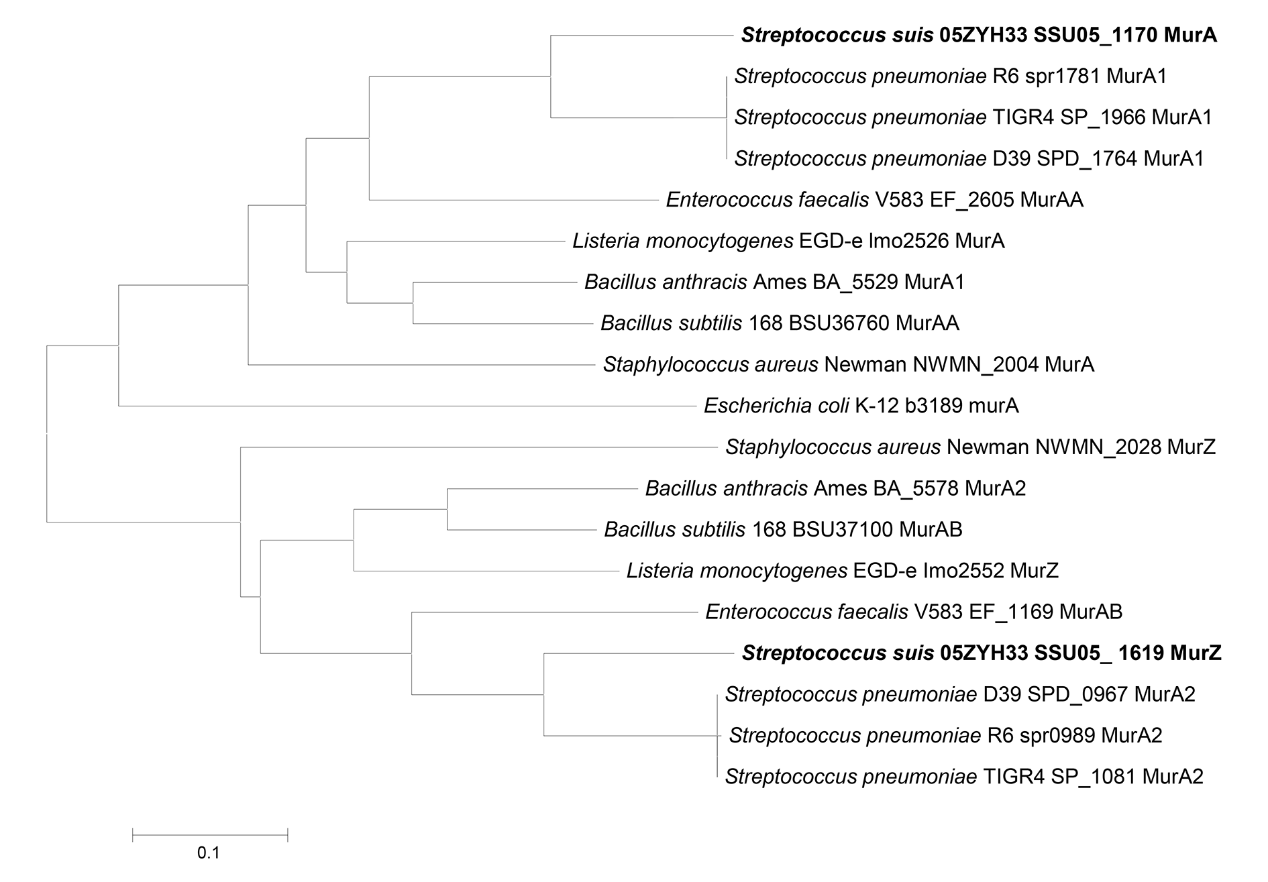


**Fig. S3 Phylogenetic relationship of MurA and MurZ homologs.** Phylogenetic tree of MurA and MurZ homologs from seven Gram-positive bacteria (*S. suis*, *S. aureus*, *L. monocytogenes*, *Bacillus subtilis*, *B. anthracis*, *E. faecalis*, *S. pneumoniae*) and the single MurA homolog from the Gram-negative bacterium *E. coli*. Amino acid sequences were aligned using ClustalX, and the tree was constructed using the neighbor-joining method in MEGA. Branch lengths are drawn to scale, and bootstrap values (1,000 replicates) are indicated at the nodes. *S. suis* MurZ (SSU05_1619) clusters with *S. pneumoniae* MurZ (MurA2) and *E. faecalis* MurAB, whereas *S. suis* MurA (SSU05_1170) clusters with *S. pneumoniae* MurA1 and *E. faecalis* MurAA. GenBank accession numbers are provided in Supplementary Table 2.


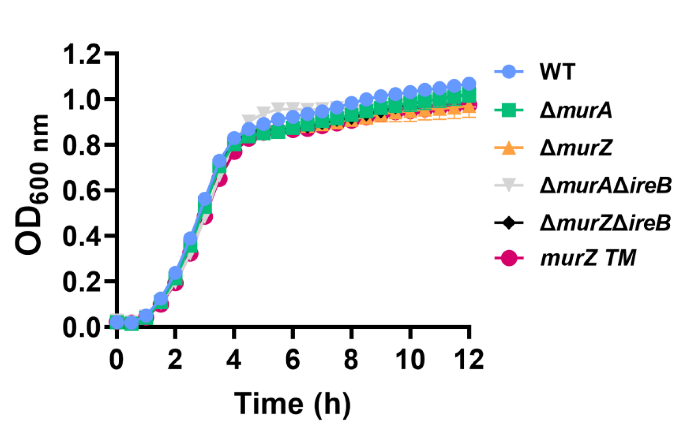


**Fig. S4 Growth curves of Δ*murA*, Δ*murZ*, Δ*murA*Δ*ireB*, Δ*murZ*Δ*ireB*, and *murZ* *TM* strains.** Strains were grown in THY medium at 37 °C with 5% CO₂. OD₆₀₀ was measured every 30 min. Data represent mean ± SD of three biological replicates.


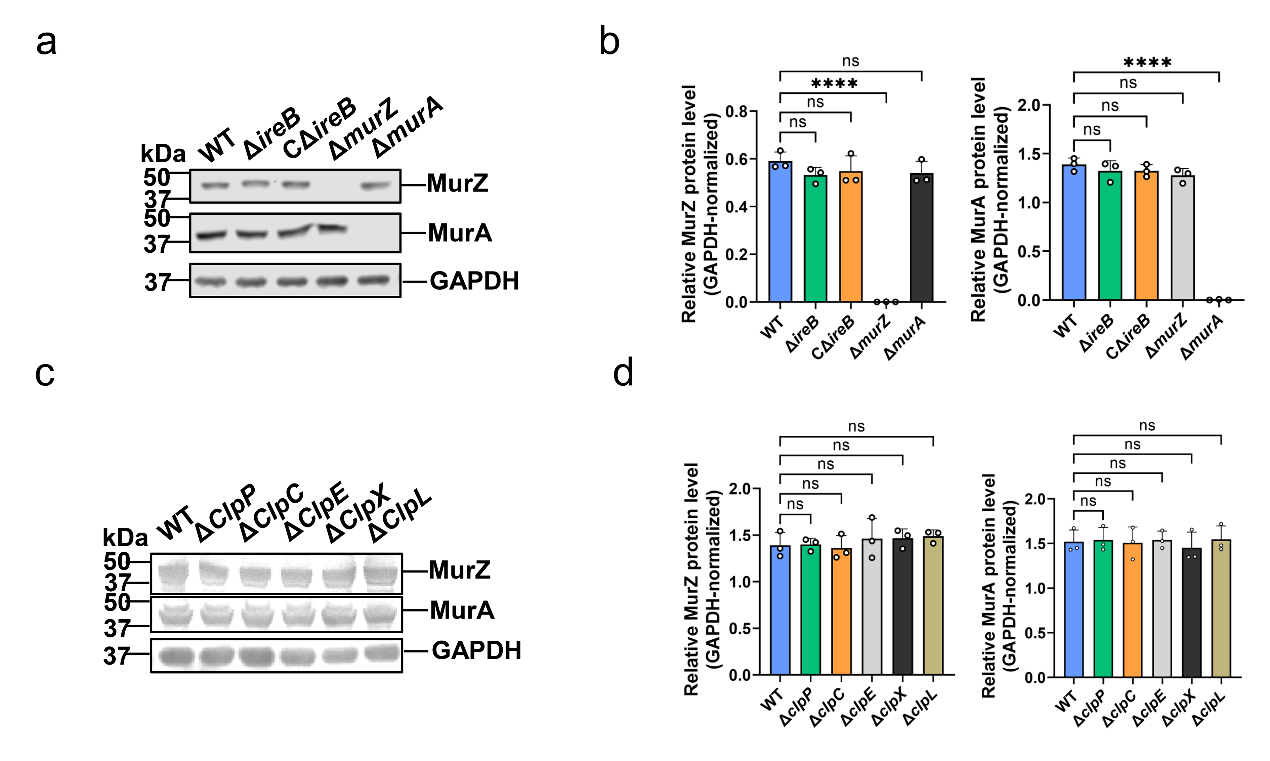


**Fig. S5 *ireB* deletion does not affect MurA or MurZ protein levels, and regulation is independent of Clp proteases. a** Immunoblot analysis of whole-cell lysates from WT, Δ*ireB*, CΔ*ireB*, Δ*murZ*, and Δ*murA* strains. MurZ and MurA protein levels were detected using anti-MurZ and anti-MurA antibodies, respectively. GAPDH was used as a loading control. **b** Densitometric quantification of relative MurZ and MurA protein levels (normalized to GAPDH) from the blots in **a**. Data are mean ± SD from three independent experiments. **c** Immunoblot analysis of whole-cell lysates from Δ*clpP*, Δ*clpC*, Δ*clpE*, Δ*clpX*, and Δ*clpL* single deletion mutants. Detection was performed as in **a.** **d** Densitometric quantification of relative MurZ and MurA protein levels (normalized to GAPDH) from the blots in **c**. Data are mean ± SD from three independent experiments. For **b** and **d**, statistical significance was determined by one-way ANOVA with Dunnett’s correction for multiple comparisons. ****P < 0.0001; ns, not significant. Source data are provided as a Source Data file.

**
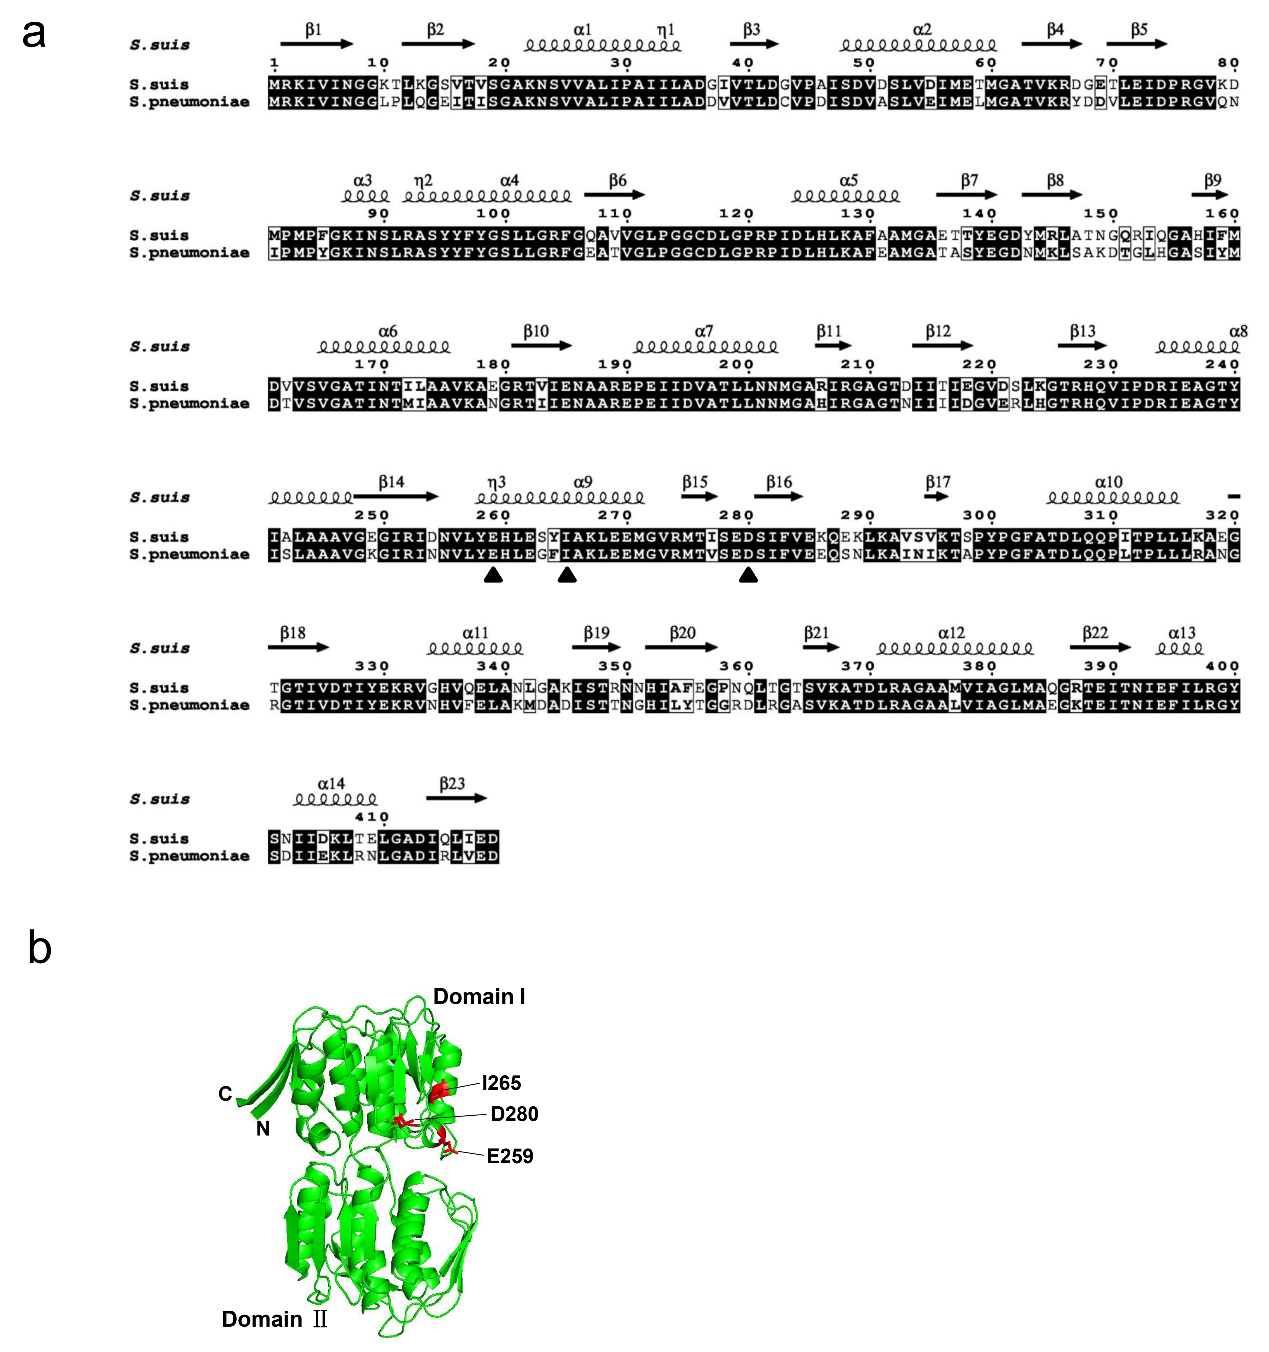
**

**Fig. S6 Conserved surface residues on *S. suis* MurZ implicated in IreB binding.** **a** Sequence alignment of MurZ orthologs from *S. suis* (ABP90585.1) and *S. pneumoniae* (ABJ54180.1). Residues equivalent to *S. pneumoniae* E259, I265, and D280 (mutated in the MurZ TM triple mutant) are marked with triangles and are highly conserved between the two species. **b** Homology model of *S. suis* MurZ (strain 05ZYH33) generated by AlphaFold v2.0. The protein backbone is shown as a green cartoon, with residues E259, I265, and D280 highlighted as red sticks.

**
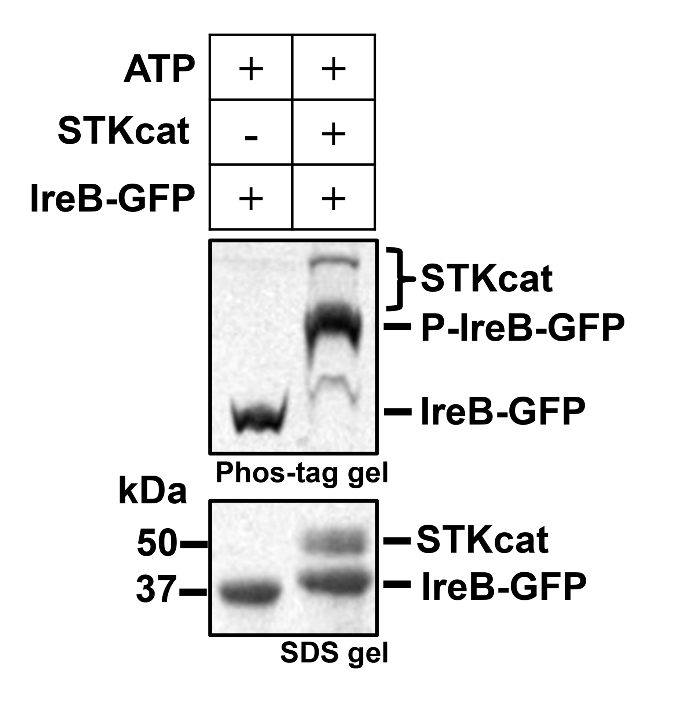
**

**Fig. S7 Phosphorylation of IreB-GFP by STK in LLPS assays (see Fig. 5f).** Analysis of IreB-GFP phosphorylation using samples from the 9 μM IreB-GFP condition in Fig. 5f, with or without STKcat. Top: Phos-tag SDS-PAGE; bottom: standard SDS-PAGE. Both gels were stained with Coomassie blue. The experiment was repeated three times independently with similar results.

**
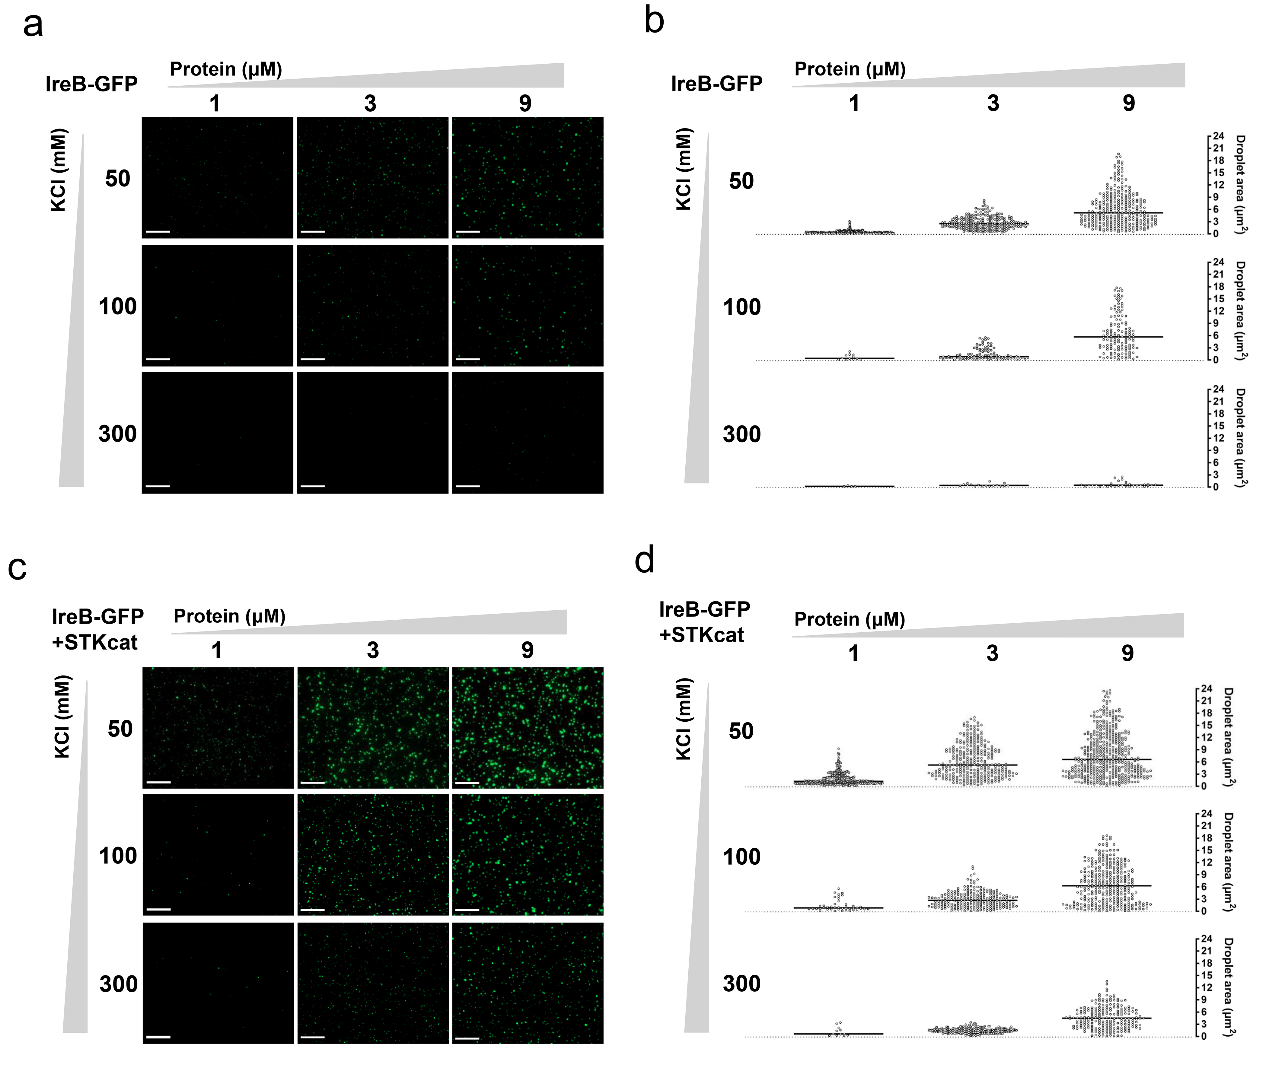
**

**Fig. S8 Salt sensitivity and STK-dependent droplet formation of IreB-GFP. a, c** Fluorescence microscopy analysis of IreB-GFP droplet formation at increasing IreB-GFP concentrations (1, 3, and 9 μM) and KCl concentrations (50, 150, and 300 mM) without (**a**) and with STKcat (1:10 molar ratio) (**c**). Scale bar, 50 μm. **b, d** Quantification of droplet size from **a** and **c**, respectively. Droplet sizes were measured using ImageJ. Data are shown as mean ± s.e.m. All experiments were performed with at least three independent biological replicates. Source data are provided as a Source Data file.

**
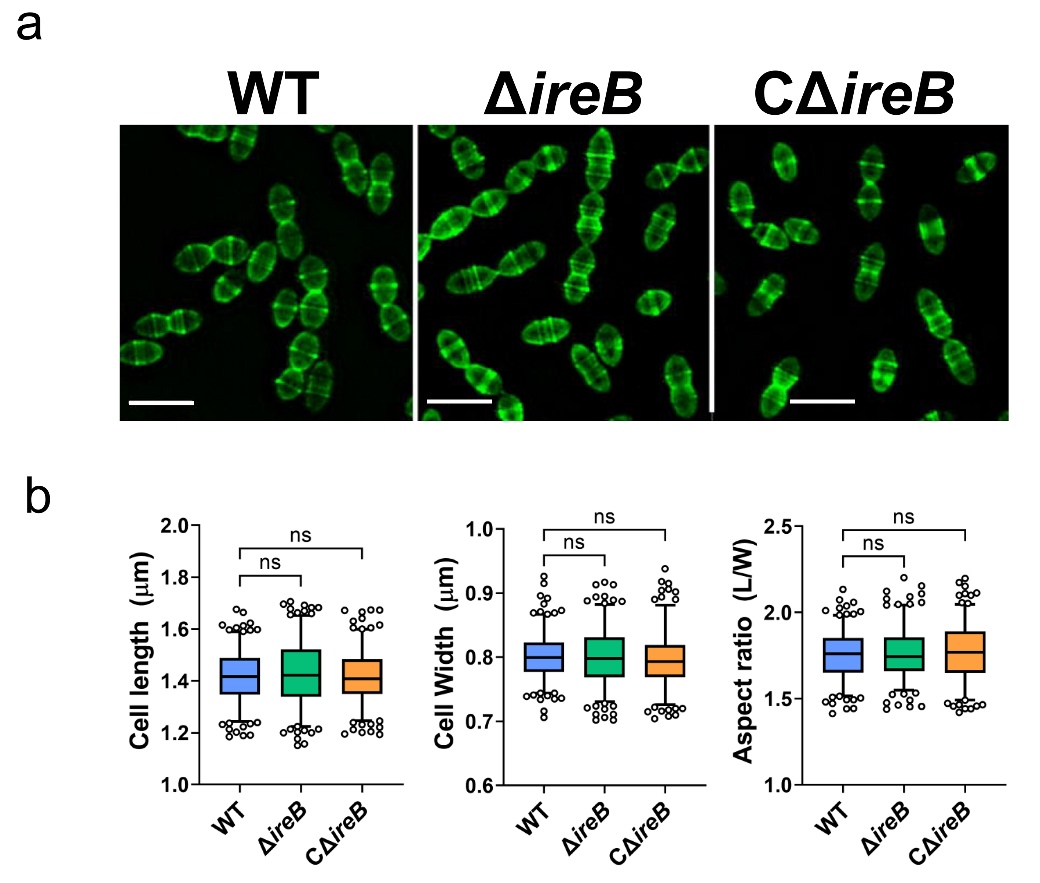
**

**Fig. S9 Δ*ireB* does not exhibit morphological defects in serum-supplemented medium (THYS). a** SR-SIM images of WT, Δ*ireB*, and CΔ*ireB* strains grown in THYS. Cell walls were stained with wheat germ agglutinin Alexa Fluor 488 conjugate (WGA488; green). Scale bar, 2 μm. **b**, Quantification of cell length, width, and aspect ratio of the indicated strains from SR-SIM images. Box-and-whisker plots show the 5th–95th percentiles (n ≥ 200 cells per strain from three independent experiments). ns, not significant. Source data are provided as a Source Data file.

**Supplementary tables**

Table S1 Mutations identified in the genome of the suppressor strain PIG-TAs.

| **Gene ID (Locus tag)** | **Gene** | **Mutation location (upstream of ATG)a** | **Wild-type sequence (5’ to 3’)b** | **Mutant sequence (5' to 3')** | **Mutation type** | **Predicted effect** |
| --- | --- | --- | --- | --- | --- | --- |
| SSU05_0417 | GpsB | -43 | TTTTT**T**AATAT | TTTTT-AATAT | Single-base deletion (T) | Potential alteration of transcription factor binding site |
| SSU05_0465 | XRE family transcriptional regulator | -6 | AAGGC**A**AAAAA | AAGGC-AAAAA | Single-base deletion (A) | Potential alteration of promoter -10/-35 box or regulatory element |
| a The mutation location is indicated relative to the start codon (ATG, designated +1) of the affected gene. | | | | | | |
| b The deleted nucleotide is shown in bold within the wild-type sequence and is replaced by a dash (-) in the mutant sequence. The sequence context (±5 bp) is shown. | | | | | | |

Table S2 GenBank accession numbers for sequences analyzed in Fig. S3

| **Protein** | **Bacterial Species** | **Strain name** | **Gene ID (Locus tag)** | **GenBank** |
| --- | --- | --- | --- | --- |
| MurA | *Streptococcus suis* | 05ZYH33 | SSU05_1170 | ABP90136.1 |
| MurA | *Staphylococcus aureus* | Newman | NWMN_2004 | BAF68276.1 |
| MurA | *Listeria monocytogenes* | EGD-e | lmo2526 | NP_466049.1 |
| MurA | *Escherichia coli* | K-12 | b3189 | AIZ52985.1 |
| MurA1a | *Streptococcus pneumoniae* | R6 | spr1781 | AAL00584.1 |
| MurA1a | *Streptococcus pneumoniae* | TIGR4 | SP_1966 | AAK76033.1 |
| MurA1a | *Streptococcus pneumoniae* | D39 | SPD_1764 | ABJ55139.1 |
| MurA1 | *Bacillus anthracis* | Ames | BA_5529 | AAP29173.1 |
| MurAA | *Enterococcus faecalis* | V583 | EF_2605 | AAO82314.1 |
| MurAA | *Bacillus subtilis* | 168 | BSU36760 | CAB15693.1 |
| MurZ | *Streptococcus suis* | 05ZYH33 | SSU05_1619 | ABP90585.1 |
| MurZ | *Listeria monocytogenes* | EGD-e | Imo2552 | NP_466075.1 |
| MurZ | *Staphylococcus aureus* | Newman | NWMN_2028 | BAF68300.1 |
| MurA2a | *Streptococcus pneumoniae* | R6 | spr0989 | AAK99793.1 |
| MurA2a | *Streptococcus pneumoniae* | TIGR4 | SP_1081 | AAK75194.1 |
| MurA2a | *Streptococcus pneumoniae* | D39 | SPD_0967 | ABJ54180.1 |
| MurA2 | *Bacillus anthracis* | Ames | BA_5578 | AAP29221.1 |
| MurAB | *Enterococcus faecalis* | V583 | EF_1169 | AAO80969.1 |
| MurAB | *Bacillus subtilis* | 168 | BSU37100 | CAB15727.2 |
| aIn the original genome annotation of *Streptococcus pneumoniae* strain D39, the MurZ and MurA homologs were designated MurA1 and MurA2, respectively2, 3. To maintain consistency with the established nomenclature, this table adopts the revised naming convention from Tsui et al.4. | | | | |
|
|

Table S3 Strain list

| **Strains name** | **Characteristics/genotype** | **Reference or source** |
| --- | --- | --- |
| ***Escherichia coli* strain** | | | |
| DH5α | F⁻ φ80*lacZ*ΔM15 Δ(*lacZYA-argF*)U169 *recA1 endA1 hsdR17*(rₖ⁻, mₖ⁺) *phoA supE44* λ⁻ *thi-1 gyrA96 relA1* | Tiangen (China) |
| BL21(DE3) | F⁻ *ompT hsdSB*(r₈⁻, m₈⁻) *gal dcm* (DE3) | Tiangen (China) |
| BTH101 | F⁻, *cya-99*, *araD139*, *galE15*, *galK16*, *rpsL1* (Strᴿ), *hsdR2*, *mcrA1*, *mcrB1* | Euromedex |
| ***Streptococcus suis* wild-type (WT) strain** | | | |
| 05ZYH33 | Wild-type *S. suis* serotype 2 | 5 |
| ***Streptococcus suis* gene-deletion strain** | | | |
| Δ*ireB* | *ireB*(*SSU05_0066*) deletion mutant of 05ZYH33 | This study |
| CΔ*ireB* | Δ*ireB* complemented with *ireB* under its native promoter | This study |
| Δ*stk* | *stk* (PASTA kinase, *SSU05_0428*) deletion mutant | This study |
| Δ*stp* | *stp* (phosphatase, *SSU05_0427*) deletion mutant | This study |
| Δc*lpP* | c*lpP*(*SSU05_1550-1551*) deletion mutant | This study |
| Δ*clpC* | c*lpC*(*SSU05_1975*) deletion mutant | This study |
| Δ*clpX* | c*lpX*(*SSU05_0837*) deletion mutant | This study |
| Δ*clpE* | c*lpE*(*SSU05_0492*) deletion mutant | This study |
| Δ*clpL* | c*lpL*(*SSU05_0389-0391*) deletion mutant | This study |
| Δ*murA* | *murA*(*SSU05_1170)*deletion mutant | This study |
| Δ*murZ* | *murZ*(*SSU05_1619)* deletion mutant | This study |
| Δ*murA*Δ*ireB* | *murA*(*SSU05_1170)* and *ireB*(*SSU05_0066)* double deletion mutant | This study |
| Δ*murZ*Δ*ireB* | *murZ*(*SSU05_1619)* and *ireB*(*SSU05_0066)* double deletion mutant | This study |
| ***Streptococcus suis* point-mutant construction** | | | |
| *ireB(T4A/T7A)* | *ireB* mutant strain carrying alanine substitutions at Thr4 and Thr7 (phospho-ablative) | This study |
| *ireB(T4E/T7E)* | *ireB* mutant strain carrying glutamate substitutions at Thr4 and Thr7 (phospho-mimetic) | This study |
| *ireB(I73R/Y80E)* | *ireB* mutant strain carrying arginine and glutamate substitutions at I73 and Y80 (dimerization-deficient) | This study |
| *murZ TM* | *murZ* mutant strain harboring E259A, I265V, and D280Y substitutions | This study |
| ***Streptococcus suis* IreB-GFP fusion strains** | | | |
| PIG  (P1503-*ireB-gfp*) | 05ZYH33 with P1503*-ireB-gfp* (sfGFP) integrated at *ireB* locus | This study |
| PIG-TA | Same as PIG, but the *ireB* is replaced by *ireB*(T4A/T7A) (phospho-ablative) | This study |
| PIG-TE | Same as PIG, but the *ireB* is replaced by *ireB*(T4E/T7E) (phospho-mimetic) | This study |
| PI(I73RY80E)G | Same as PIG, but the *ireB* is replaced by *ireB*(I73R/Y80E) (dimerization-deficient) | This study |
| PIG Δ*stk* | Same as PIG, with an additional deletion of *stk* (Δ*stk*) | This study |
| PIG-TE Δ*stk* | Same as PIG-TE, with an additional deletion of *stk* (Δ*stk*)*.* | This study |
| PIG Δ*stp* | Same as PIG, with an additional deletion of *stp* (Δ*stp*) | This study |

Table S4. Plasmid list

| **Plasmids** | **Description/genotype** | **Reference or source** |
| --- | --- | --- |
| pET22b | Protein expression vector; Ampr | Clontech |
| pET42a | Protein expression vector; Kanr | Clontech |
| pKT25 | BACTH bait vector; Kanʳ | Euromedex |
| pKNT25 | BACTH bait vector; Kanʳ | Euromedex |
| pUT18 | BACTH prey vector; Ampʳ | Euromedex |
| pUT18C | BACTH prey vector; Ampʳ | Euromedex |
| P1 | pET22b::*ireB*; *ireB* from 05ZYH33; Ampr | This study |
| P2 | pET42a::*stkcat*; *stkcat* (residues 1–346 of STK) from 05ZYH33; Kanr | This study |
| P3 | pET22b::*stp*; *stp* from 05ZYH33; Ampr | This study |
| P4 | pET22b:*:ireB*(T4A); *ireB* from 05ZYH33 carrying T4A substitution; Ampr | This study |
| P5 | pET22b::*ireB*(T7A), *ireB* from 05ZYH33 carrying T7A substitution; Ampr | This study |
| P6 | pET22b::*ireB*(T4A/T7A), *ireB* from 05ZYH33 carrying T4A and T7A substitutions; Ampr | This study |
| P7 | pET22b::*ireB*(T4E/T7E), *ireB* from 05ZYH33 carrying T4E and T7E substitutions; Ampr | This study |
| P8 | pMV::*sfgfp*; encodes superfolder GFP; Ampr | Synthesized by BGI |
| P9 | pET22b::*ireB-gfp*; *ireB-gfp* fusion; Ampr | This study |
| P10 | pET22b::*ireB*(I73R/Y80E); *ireB* from 05ZYH33 carrying I73R and Y80E substitutions; Ampr | This study |
| P11 | pET22b::*murA*; *murA* from 05ZYH33; Ampr | This study |
| P12 | pET22b::*murZ*; *murZ* from 05ZYH33; Ampr | This study |
| P13 | pET22b::*murZ*(D280Y); *murZ* from 05ZYH33 carrying D280Y substitutions; Ampr |  |
| P14 | pET22b::*murZ(E259A/I265V/D280Y)*; *murZ* from 05ZYH33 carrying E259A, I265V, D280Y substitutions; Ampr | This study |
| P15 | pKT25::*ireB*, encodes T25‑IreB fusion (bait); Kanr | This study |
| P16 | pKNT25::*ireB*, encodes IreB-T25 fusion (bait); Kanʳ | This study |
| P17 | pUT18C::*murA*, encodes T18-MurA fusion (prey); Ampʳ | This study |
| P18 | pUT18::*murA*, encodes MurA-T18 fusion (prey); Ampʳ | This study |
| P19 | pUT18C::*murZ*, encodes T18-MurZ fusion (prey); Ampʳ | This study |
| P20 | pUT18::*murZ*, encodes MurZ-T18 fusion (prey); Ampʳ | This study |
| P21 | pUT18C::*murZ(E259A/I265V/D280Y)*, encodes T18-MurZ fusion carrying E259A, I265V, D280Y substitutions (prey); Ampʳ | This study |
| P22 | pUT18::*murZ(E259A/I265V/D280Y)*, encodes MurZ-T18 fusion carrying E259A, I265V, D280Y substitutions (prey); Ampʳ | This study |

**Supplementary References**

1. Schneider, C.A., Rasband, W.S. & Eliceiri, K.W. NIH Image to ImageJ: 25 years of image analysis. *Nat. Methods* **9**, 671-675 (2012).

2. Lanie, J.A. et al. Genome sequence of Avery's virulent serotype 2 strain D39 of *Streptococcus pneumoniae* and comparison with that of unencapsulated laboratory strain R6. *J. Bacteriol.* **189**, 38-51 (2007).

3. Slager, J., Aprianto, R. & Veening, J.W. Deep genome annotation of the opportunistic human pathogen *Streptococcus pneumoniae* D39. *Nucleic Acids Res.* **46**, 9971-9989 (2018).

4. Tsui, H.T. et al. Negative regulation of MurZ and MurA underlies the essentiality of GpsB- and StkP-mediated protein phosphorylation in *Streptococcus pneumoniae* D39. *Mol. Microbiol.* (2023).

5. Chen, C. et al. A glimpse of streptococcal toxic shock syndrome from comparative genomics of *S. suis* 2 Chinese isolates. *PLoS One* **2**, e315 (2007).
