# Supplementary material
Source: Research Square preprint supplement (doi:10.21203/rs.3.rs-9591596/v1)
Supplement: Supplementary file 2 [file 78567a701e79066bce3d21ad.xlsx]

## Sheet: Figure 1a
	Figure 1a	Relative Fluorescence Intensity
		WT	ΔireB	CΔireB
		36.249	53.666	35.3121
		31.3588	47.5474	31.789
		32.3588	49.5474	33.789

## Sheet: Figure 1d
	Figure 1d	Cell Length			Cell Width			Cell Aspect
		WT	ΔireB	CΔireB	WT	ΔireB	CΔireB	WT	ΔireB	CΔireB
		1.773	1.954	1.971	1.019	1.017	1.036	1.993	2.114	2.033
		1.735	1.934	1.956	1.016	0.982	1.025	1.953	2.084	1.994
		1.73	1.921	1.836	0.992	0.97	1.015	1.902	1.98	1.993
		1.73	1.881	1.764	0.99	0.97	1.007	1.902	1.975	1.962
		1.73	1.837	1.733	0.99	0.965	1.004	1.897	1.972	1.953
		1.72	1.785	1.733	0.989	0.964	1.002	1.892	1.945	1.919
		1.709	1.742	1.712	0.988	0.962	0.983	1.891	1.941	1.891
		1.703	1.681	1.71	0.972	0.959	0.981	1.886	1.937	1.871
		1.701	1.675	1.699	0.97	0.954	0.974	1.874	1.932	1.863
		1.701	1.655	1.689	0.97	0.953	0.971	1.871	1.921	1.856
		1.688	1.645	1.688	0.967	0.949	0.956	1.871	1.92	1.855
		1.686	1.638	1.688	0.967	0.946	0.955	1.871	1.906	1.85
		1.686	1.637	1.688	0.965	0.942	0.951	1.861	1.89	1.845
		1.682	1.628	1.686	0.965	0.94	0.951	1.846	1.873	1.842
		1.679	1.614	1.682	0.963	0.936	0.951	1.845	1.87	1.842
		1.674	1.613	1.674	0.962	0.934	0.948	1.835	1.861	1.827
		1.674	1.611	1.673	0.96	0.933	0.946	1.832	1.852	1.825
		1.674	1.609	1.672	0.959	0.932	0.943	1.831	1.851	1.824
		1.667	1.608	1.666	0.959	0.932	0.942	1.827	1.848	1.814
		1.663	1.605	1.663	0.959	0.931	0.941	1.826	1.847	1.806
		1.662	1.58	1.66	0.957	0.928	0.94	1.817	1.83	1.804
		1.658	1.57	1.656	0.956	0.926	0.934	1.814	1.813	1.804
		1.657	1.565	1.654	0.95	0.924	0.933	1.806	1.811	1.795
		1.654	1.565	1.654	0.949	0.923	0.93	1.805	1.806	1.789
		1.654	1.562	1.651	0.948	0.921	0.926	1.804	1.802	1.789
		1.654	1.56	1.647	0.942	0.92	0.922	1.804	1.775	1.787
		1.648	1.557	1.645	0.939	0.919	0.92	1.796	1.768	1.787
		1.637	1.555	1.641	0.939	0.919	0.919	1.795	1.767	1.784
		1.633	1.533	1.641	0.937	0.917	0.919	1.789	1.765	1.782
		1.624	1.532	1.64	0.936	0.914	0.918	1.787	1.753	1.782
		1.623	1.53	1.638	0.934	0.912	0.918	1.782	1.752	1.782
		1.623	1.528	1.636	0.931	0.911	0.917	1.782	1.748	1.778
		1.623	1.51	1.635	0.929	0.91	0.917	1.781	1.746	1.769
		1.623	1.508	1.634	0.928	0.909	0.914	1.78	1.743	1.763
		1.622	1.508	1.616	0.926	0.904	0.914	1.778	1.743	1.758
		1.621	1.505	1.612	0.923	0.901	0.913	1.769	1.742	1.756
		1.619	1.502	1.609	0.923	0.901	0.913	1.766	1.74	1.738
		1.619	1.501	1.605	0.922	0.9	0.912	1.763	1.725	1.732
		1.619	1.493	1.6	0.92	0.9	0.911	1.756	1.723	1.732
		1.61	1.493	1.599	0.918	0.899	0.91	1.754	1.714	1.729
		1.609	1.491	1.598	0.918	0.896	0.909	1.743	1.712	1.724
		1.604	1.49	1.597	0.918	0.894	0.909	1.743	1.709	1.724
		1.604	1.486	1.596	0.918	0.893	0.908	1.738	1.707	1.723
		1.604	1.481	1.596	0.916	0.892	0.907	1.734	1.703	1.722
		1.602	1.467	1.594	0.914	0.891	0.906	1.732	1.7	1.722
		1.597	1.466	1.593	0.913	0.891	0.905	1.731	1.693	1.721
		1.596	1.463	1.591	0.913	0.891	0.904	1.731	1.673	1.72
		1.596	1.462	1.59	0.913	0.891	0.904	1.729	1.667	1.716
		1.596	1.462	1.59	0.911	0.891	0.904	1.725	1.664	1.716
		1.595	1.461	1.588	0.91	0.883	0.903	1.724	1.66	1.716
		1.595	1.457	1.58	0.909	0.883	0.903	1.724	1.657	1.714
		1.595	1.456	1.577	0.908	0.881	0.903	1.723	1.651	1.713
		1.591	1.453	1.577	0.908	0.878	0.903	1.722	1.649	1.711
		1.591	1.452	1.573	0.908	0.878	0.902	1.722	1.629	1.709
		1.588	1.45	1.571	0.907	0.877	0.902	1.719	1.628	1.7
		1.588	1.449	1.568	0.906	0.876	0.901	1.716	1.623	1.697
		1.587	1.445	1.567	0.905	0.876	0.901	1.716	1.62	1.696
		1.586	1.437	1.566	0.902	0.876	0.899	1.701	1.61	1.696
		1.584	1.435	1.565	0.901	0.874	0.899	1.7	1.607	1.695
		1.584	1.435	1.563	0.901	0.873	0.898	1.7	1.604	1.695
		1.584	1.434	1.561	0.901	0.873	0.895	1.699	1.601	1.69
		1.574	1.433	1.561	0.901	0.872	0.895	1.698	1.6	1.689
		1.574	1.432	1.56	0.899	0.872	0.894	1.697	1.593	1.683
		1.574	1.43	1.56	0.898	0.872	0.893	1.696	1.591	1.683
		1.574	1.426	1.559	0.897	0.869	0.892	1.695	1.59	1.681
		1.574	1.423	1.559	0.897	0.869	0.892	1.694	1.586	1.679
		1.561	1.42	1.557	0.897	0.868	0.892	1.689	1.581	1.677
		1.561	1.419	1.555	0.896	0.868	0.891	1.688	1.576	1.675
		1.56	1.418	1.553	0.895	0.867	0.891	1.687	1.575	1.667
		1.553	1.417	1.552	0.893	0.867	0.891	1.686	1.575	1.667
		1.551	1.416	1.549	0.892	0.867	0.89	1.684	1.573	1.664
		1.551	1.415	1.537	0.892	0.867	0.89	1.683	1.563	1.663
		1.551	1.415	1.537	0.891	0.866	0.89	1.682	1.562	1.663
		1.55	1.405	1.533	0.891	0.864	0.888	1.681	1.558	1.661
		1.549	1.404	1.533	0.891	0.863	0.888	1.681	1.558	1.659
		1.548	1.399	1.532	0.891	0.863	0.887	1.68	1.557	1.658
		1.548	1.398	1.531	0.888	0.859	0.886	1.677	1.556	1.654
		1.548	1.398	1.529	0.888	0.859	0.885	1.677	1.55	1.653
		1.547	1.396	1.528	0.887	0.857	0.885	1.675	1.547	1.652
		1.54	1.395	1.527	0.887	0.854	0.885	1.672	1.546	1.651
		1.539	1.39	1.527	0.887	0.85	0.884	1.667	1.538	1.651
		1.539	1.388	1.526	0.885	0.849	0.884	1.666	1.531	1.65
		1.539	1.388	1.525	0.885	0.849	0.882	1.664	1.529	1.641
		1.539	1.387	1.524	0.885	0.847	0.881	1.663	1.529	1.64
		1.538	1.385	1.523	0.884	0.847	0.88	1.663	1.529	1.635
		1.538	1.384	1.523	0.882	0.847	0.88	1.663	1.528	1.633
		1.538	1.373	1.522	0.882	0.847	0.88	1.658	1.528	1.628
		1.537	1.368	1.519	0.88	0.846	0.88	1.658	1.527	1.628
		1.537	1.364	1.516	0.88	0.846	0.879	1.656	1.523	1.625
		1.537	1.364	1.512	0.88	0.844	0.876	1.652	1.521	1.623
		1.535	1.361	1.512	0.878	0.843	0.875	1.651	1.516	1.621
		1.535	1.361	1.512	0.877	0.843	0.874	1.65	1.515	1.616
		1.535	1.358	1.511	0.876	0.841	0.874	1.647	1.513	1.616
		1.53	1.358	1.51	0.875	0.841	0.874	1.646	1.506	1.616
		1.529	1.357	1.51	0.874	0.839	0.873	1.645	1.494	1.616
		1.525	1.356	1.507	0.874	0.839	0.873	1.644	1.488	1.614
		1.524	1.352	1.505	0.872	0.839	0.873	1.643	1.485	1.611
		1.523	1.35	1.504	0.872	0.837	0.872	1.64	1.482	1.608
		1.522	1.35	1.503	0.872	0.837	0.872	1.64	1.482	1.601
		1.517	1.346	1.503	0.872	0.837	0.871	1.636	1.479	1.601
		1.517	1.345	1.501	0.872	0.836	0.871	1.635	1.478	1.598
		1.517	1.344	1.501	0.872	0.835	0.87	1.628	1.476	1.595
		1.515	1.343	1.498	0.871	0.834	0.87	1.628	1.475	1.59
		1.514	1.342	1.497	0.871	0.834	0.869	1.623	1.474	1.589
		1.514	1.34	1.495	0.871	0.834	0.869	1.623	1.469	1.587
		1.514	1.337	1.495	0.869	0.833	0.868	1.623	1.469	1.586
		1.512	1.333	1.492	0.868	0.832	0.867	1.623	1.462	1.583
		1.51	1.333	1.489	0.868	0.832	0.867	1.622	1.462	1.576
		1.509	1.33	1.486	0.866	0.832	0.866	1.62	1.455	1.573
		1.509	1.328	1.484	0.866	0.83	0.866	1.616	1.454	1.569
		1.506	1.328	1.481	0.865	0.83	0.866	1.616	1.451	1.569
		1.506	1.321	1.48	0.865	0.829	0.865	1.616	1.45	1.568
		1.504	1.32	1.478	0.864	0.828	0.864	1.613	1.449	1.567
		1.503	1.318	1.474	0.864	0.827	0.864	1.611	1.444	1.561
		1.503	1.317	1.473	0.864	0.827	0.864	1.609	1.441	1.56
		1.503	1.315	1.47	0.863	0.825	0.861	1.608	1.432	1.558
		1.502	1.313	1.47	0.862	0.825	0.861	1.602	1.429	1.556
		1.499	1.312	1.47	0.861	0.824	0.861	1.601	1.428	1.555
		1.499	1.312	1.469	0.861	0.823	0.86	1.598	1.425	1.553
		1.497	1.309	1.468	0.861	0.823	0.859	1.597	1.424	1.553
		1.495	1.305	1.467	0.859	0.823	0.859	1.594	1.417	1.551
		1.495	1.304	1.466	0.858	0.822	0.858	1.593	1.414	1.547
		1.495	1.304	1.464	0.857	0.821	0.858	1.587	1.41	1.546
		1.49	1.298	1.464	0.856	0.82	0.857	1.584	1.41	1.545
		1.49	1.296	1.463	0.855	0.819	0.856	1.582	1.406	1.543
		1.49	1.295	1.463	0.854	0.818	0.856	1.58	1.402	1.541
		1.49	1.287	1.462	0.853	0.817	0.855	1.577	1.401	1.541
		1.489	1.286	1.459	0.852	0.816	0.855	1.576	1.399	1.54
		1.489	1.282	1.458	0.852	0.815	0.854	1.575	1.398	1.54
		1.489	1.28	1.458	0.852	0.815	0.854	1.574	1.396	1.539
		1.488	1.279	1.458	0.852	0.814	0.852	1.572	1.395	1.537
		1.488	1.279	1.458	0.851	0.813	0.852	1.572	1.389	1.534
		1.487	1.278	1.455	0.851	0.812	0.851	1.571	1.387	1.532
		1.482	1.276	1.454	0.851	0.811	0.851	1.568	1.385	1.528
		1.48	1.275	1.453	0.851	0.811	0.851	1.567	1.383	1.524
		1.48	1.272	1.451	0.849	0.809	0.85	1.563	1.376	1.523
		1.48	1.268	1.45	0.849	0.809	0.849	1.558	1.374	1.516
		1.48	1.267	1.45	0.848	0.809	0.847	1.557	1.374	1.513
		1.478	1.261	1.449	0.847	0.807	0.847	1.549	1.372	1.511
		1.476	1.257	1.449	0.847	0.807	0.847	1.545	1.363	1.511
		1.474	1.256	1.448	0.847	0.807	0.846	1.545	1.363	1.51
		1.473	1.254	1.448	0.846	0.806	0.846	1.544	1.362	1.51
		1.472	1.254	1.446	0.846	0.805	0.846	1.542	1.362	1.51
		1.472	1.253	1.445	0.845	0.805	0.844	1.542	1.359	1.51
		1.472	1.252	1.443	0.845	0.805	0.844	1.541	1.352	1.509
		1.472	1.251	1.443	0.844	0.804	0.843	1.54	1.35	1.507
		1.472	1.247	1.442	0.843	0.804	0.843	1.54	1.347	1.505
		1.472	1.245	1.442	0.843	0.803	0.84	1.539	1.346	1.501
		1.469	1.24	1.442	0.841	0.802	0.839	1.534	1.346	1.499
		1.459	1.235	1.436	0.84	0.802	0.839	1.533	1.345	1.499
		1.459	1.23	1.432	0.84	0.8	0.838	1.532	1.34	1.495
		1.459	1.227	1.432	0.839	0.8	0.838	1.53	1.34	1.493
		1.458	1.224	1.431	0.838	0.8	0.837	1.53	1.339	1.492
		1.457	1.22	1.429	0.838	0.799	0.837	1.53	1.335	1.492
		1.457	1.212	1.426	0.837	0.798	0.836	1.53	1.334	1.486
		1.457	1.211	1.426	0.837	0.798	0.836	1.528	1.33	1.485
		1.448	1.211	1.426	0.836	0.796	0.835	1.527	1.329	1.485
		1.444	1.211	1.424	0.835	0.796	0.834	1.524	1.328	1.483
		1.44	1.208	1.422	0.835	0.796	0.833	1.519	1.327	1.482
		1.44	1.207	1.419	0.835	0.796	0.833	1.518	1.322	1.481
		1.433	1.206	1.415	0.834	0.796	0.833	1.51	1.315	1.481
		1.433	1.205	1.41	0.834	0.795	0.832	1.508	1.311	1.479
		1.426	1.195	1.41	0.831	0.794	0.832	1.506	1.31	1.479
		1.424	1.187	1.408	0.831	0.794	0.831	1.503	1.306	1.479
		1.423	1.185	1.406	0.83	0.794	0.826	1.499	1.291	1.478
		1.423	1.177	1.403	0.83	0.794	0.824	1.499	1.291	1.477
		1.421	1.168	1.402	0.829	0.794	0.822	1.499	1.29	1.476
		1.421	1.166	1.399	0.829	0.794	0.822	1.493	1.288	1.475
		1.415	1.156	1.398	0.829	0.792	0.82	1.493	1.288	1.474
		1.415	1.153	1.395	0.828	0.792	0.82	1.493	1.283	1.472
		1.414	1.152	1.395	0.827	0.791	0.82	1.492	1.281	1.472
		1.414	1.149	1.393	0.827	0.791	0.818	1.492	1.278	1.463
		1.409	1.138	1.392	0.825	0.79	0.817	1.486	1.272	1.451
		1.409	1.129	1.389	0.825	0.79	0.816	1.485	1.268	1.447
		1.409	1.126	1.388	0.824	0.789	0.814	1.484	1.265	1.447
		1.409	1.118	1.387	0.823	0.789	0.811	1.481	1.26	1.438
		1.409	1.118	1.384	0.822	0.789	0.811	1.479	1.257	1.437
		1.406	1.112	1.379	0.814	0.788	0.81	1.474	1.254	1.437
		1.403	1.112	1.378	0.813	0.788	0.809	1.47	1.24	1.434
		1.402	1.11	1.376	0.812	0.787	0.809	1.469	1.24	1.432
		1.402	1.108	1.376	0.81	0.786	0.808	1.467	1.238	1.419
		1.402	1.104	1.374	0.81	0.785	0.807	1.465	1.236	1.415
		1.391	1.102	1.373	0.808	0.784	0.806	1.463	1.236	1.411
		1.391	1.102	1.371	0.808	0.784	0.804	1.463	1.234	1.41
		1.391	1.1	1.369	0.806	0.782	0.804	1.461	1.232	1.406
		1.391	1.094	1.366	0.806	0.781	0.804	1.46	1.231	1.404
		1.388	1.092	1.364	0.805	0.78	0.799	1.457	1.23	1.397
		1.388	1.078	1.363	0.804	0.778	0.799	1.452	1.224	1.385
		1.388	1.076	1.36	0.804	0.777	0.798	1.447	1.222	1.378
		1.388	1.073	1.36	0.804	0.777	0.797	1.438	1.22	1.372
		1.388	1.06	1.36	0.804	0.777	0.796	1.437	1.212	1.371
		1.387	1.059	1.356	0.802	0.773	0.795	1.434	1.206	1.371
		1.374	1.058	1.355	0.802	0.769	0.794	1.43	1.202	1.37
		1.369	1.053	1.354	0.799	0.768	0.79	1.425	1.201	1.365
		1.362	1.052	1.353	0.795	0.768	0.79	1.417	1.194	1.357
		1.362	1.05	1.352	0.794	0.767	0.79	1.413	1.194	1.356
		1.353	1.049	1.35	0.793	0.767	0.788	1.411	1.191	1.352
		1.353	1.047	1.349	0.791	0.766	0.788	1.407	1.149	1.352
		1.349	1.046	1.348	0.79	0.765	0.787	1.4	1.149	1.346
		1.348	1.036	1.346	0.788	0.764	0.786	1.394	1.149	1.342
		1.348	1.034	1.341	0.785	0.762	0.786	1.391	1.144	1.337
		1.347	1.013	1.326	0.784	0.761	0.785	1.384	1.13	1.33
		1.347	1.01	1.326	0.783	0.761	0.784	1.374	1.123	1.328
		1.329	1	1.319	0.781	0.757	0.782	1.374	1.121	1.328
		1.329	0.996	1.313	0.777	0.754	0.78	1.37	1.106	1.323
		1.299	0.99	1.301	0.777	0.753	0.778	1.352	1.105	1.321
		1.297	0.986	1.299	0.774	0.752	0.776	1.337	1.1	1.317
		1.297	0.986	1.298	0.769	0.75	0.762	1.33	1.062	1.314
		1.288	0.986	1.292	0.767	0.745	0.759	1.328	1.042	1.301
		1.288	0.955	1.285	0.766	0.744	0.756	1.323	1.031	1.293
		1.282	0.953	1.281	0.766	0.742	0.755	1.321	1.03	1.293
		1.282	0.953	1.27	0.765	0.739	0.748	1.315	1.014	1.285
		1.279	0.937	1.255	0.755	0.736	0.737	1.293	0.991	1.278
			0.931	1.254		0.715	0.735		0.975	1.265
			0.926	1.208		0.708	0.709		0.93	1.219
			0.914	1.195		0.702	0.705		0.93	1.212
				1.193			0.69			1.156

## Sheet: Figure 1f
	Figure 1f	cell wall thickness
		WT	ΔireB	CΔireB
		23.235	33.042	24.908
		22.736	32.755	23.307
		22.656	32.71	22.771
		22.535	30.32	21.293
		21.783	29.879	20.546
		20.336	29.829	20.488
		20.282	29.7	20.411
		20.266	29.554	20.071
		20.117	29.554	19.704
		19.871	29.386	19.704
		19.783	29.34	19.671
		19.771	28.986	19.668
		19.668	28.774	19.564
		19.56	28.373	19.337
		19.56	27.912	19.011
		19.394	27.896	18.913
		19.366	27.737	18.824
		19.262	27.605	18.756
		19.262	27.201	18.727
		19.244	26.699	18.633
		18.995	25.992	18.433
		18.862	25.92	18.297
		18.857	25.823	18.174
		18.854	25.482	18.074
		18.815	25.411	18.029
		18.765	25.251	17.994
		18.556	25.161	17.908
		18.449	25.091	17.896
		18.357	25.085	17.745
		18.138	25.079	17.745
		18.116	25.029	17.535
		18.107	25.024	17.463
		17.922	24.56	17.354
		17.911	24.402	17.351
		17.72	24.331	17.213
		17.715	24.329	17.088
		17.527	24.318	17.08
		17.41	24.29	17.01
		17.405	24.107	16.943
		17.371	23.985	16.943
		17.302	23.858	16.863
		17.278	23.827	16.771
		17.237	23.6	16.756
		17.233	23.451	16.713
		17.16	23.264	16.682
		17.087	23.216	16.587
		17.061	23.14	16.584
		16.995	23.107	16.564
		16.965	23.092	16.564
		16.934	23.076	16.536
		16.929	23.061	16.477
		16.839	23.009	16.44
		16.729	22.539	16.424
		16.456	22.361	16.377
		16.346	22.086	16.311
		16.332	22.036	16.253
		16.21	21.967	16.213
		16.129	21.919	16.21
		15.989	21.913	16.142
		15.83	21.86	16.116
		15.79	21.846	15.985
		15.782	21.776	15.889
		15.752	21.541	15.716
		15.751	21.539	15.706
		15.609	21.355	15.692
		15.568	21.181	15.692
		15.553	21.1249	15.692
		15.535	20.994	15.665
		15.507	20.938	15.663
		15.426	20.794	15.645
		15.403	20.621	15.568
		15.314	20.61	15.556
		15.286	20.521	15.546
		15.286	20.492	15.529
		15.149	20.348	15.525
		15.104	20.336	15.505
		15.056	20.107	15.447
		15.046	19.99	15.409
		14.907	19.947	15.404
		14.874	19.92	15.355
		14.874	19.9	15.341
		14.824	19.897	15.277
		14.824	19.818	15.268
		14.742	19.706	15.266
		14.618	19.689	15.223
		14.618	19.682	15.212
		14.618	19.631	15.175
		14.61	19.405	15.144
		14.581	19.405	15.109
		14.579	19.315	15.046
		14.522	19.267	15.041
		14.501	19.237	14.97
		14.396	19.128	14.845
		14.396	19.087	14.768
		14.391	19.072	14.72
		14.321	19.028	14.716
		14.304	18.889	14.594
		14.293	18.821	14.581
		14.213	18.773	14.566
		14.081	18.749	14.366
		14.078	18.749	14.28
		14.048	18.743	14.259
		14.048	18.664	14.202
		14.028	18.611	14.14
		14.002	18.581	14.076
		13.959	18.53	14.069
		13.913	18.525	14.063
		13.883	18.443	14.046
		13.883	18.339	13.923
		13.868	18.158	13.892
		13.868	18.075	13.824
		13.837	18.051	13.767
		13.837	18.041	13.765
		13.769	18.033	13.727
		13.76	17.97	13.7
		13.754	17.969	13.655
		13.702	17.902	13.632
		13.663	17.794	13.488
		13.655	17.705	13.422
		13.634	17.642	13.378
		13.585	17.589	13.335
		13.569	17.506	13.274
		13.431	17.371	13.269
		13.304	17.23	13.257
		13.274	17.159	13.193
		13.247	17.117	13.14
		13.203	17.055	13.042
		12.997	17.048	13.04
		12.982	16.597	13.038
		12.973	16.571	12.753
		12.929	16.502	12.65
		12.891	16.332	12.61
		12.859	16.065	12.553
		12.821	15.96	12.404
		12.821	15.657	12.332
		12.815	15.601	12.266
		12.724	15.361	12.204
		12.719	15.094	12.151
		12.699	15.03	12.108
		12.594	14.967	11.865
		12.452	14.909	11.778
		12.297	14.88
		12.212	14.594
		12.189	14.179
		12.14
		11.941
		11.9
		11.829
		11.829
		11.799
		11.607
		11.439
		11.26
		11.146
		10.74
		9.987

## Sheet: Figure 2a
	Figure 2a

## Sheet: Figure 2b
	Figure 2b

## Sheet: Figure 2d
	Figure 2d
		anti-IreB
		anti-GAPDH

## Sheet: Figure 2e
	Figure 2e	Size‑exclusion chromatography (SEC)
	Volume (mL)	IreB	P-IreB	IreB(I73R/Y80E)
	11.0012	-0.56586	-0.67767	-0.41456
	11.002	-0.56526	-0.67806	-0.41251
	11.0029	-0.56495	-0.67817	-0.41241
	11.0037	-0.56555	-0.67832	-0.41325
	11.0045	-0.56505	-0.67826	-0.41478
	11.0053	-0.56431	-0.678	-0.41573
	11.0062	-0.56512	-0.67898	-0.41445
	11.007	-0.56536	-0.67862	-0.41475
	11.0078	-0.56579	-0.67865	-0.41407
	11.0087	-0.56625	-0.67797	-0.41429
	11.0095	-0.56646	-0.67784	-0.41575
	11.0104	-0.56738	-0.67826	-0.41468
	11.0112	-0.56689	-0.67699	-0.41415
	11.012	-0.56659	-0.6779	-0.41378
	11.0129	-0.56536	-0.67782	-0.41448
	11.0137	-0.56469	-0.67845	-0.41486
	11.0145	-0.56426	-0.67926	-0.41434
	11.0153	-0.5644	-0.67969	-0.41393
	11.0162	-0.56455	-0.68055	-0.41339
	11.017	-0.5637	-0.68094	-0.41422
	11.0178	-0.56319	-0.68055	-0.41445
	11.0187	-0.56327	-0.6796	-0.41496
	11.0195	-0.56261	-0.67827	-0.41556
	11.0204	-0.56202	-0.67677	-0.41631
	11.0212	-0.56231	-0.676	-0.41639
	11.022	-0.56283	-0.67613	-0.41654
	11.0229	-0.56309	-0.67696	-0.41867
	11.0237	-0.56398	-0.67731	-0.41884
	11.0245	-0.56362	-0.67707	-0.4176
	11.0253	-0.56369	-0.67627	-0.41665
	11.0262	-0.56451	-0.67727	-0.41606
	11.027	-0.56521	-0.67672	-0.41646
	11.0279	-0.56547	-0.67731	-0.41685
	11.0287	-0.5654	-0.67744	-0.41744
	11.0295	-0.56522	-0.67756	-0.41771
	11.0304	-0.56395	-0.6775	-0.41668
	11.0312	-0.56469	-0.6776	-0.41753
	11.032	-0.56571	-0.67744	-0.41752
	11.0328	-0.56563	-0.67647	-0.41944
	11.0337	-0.56595	-0.67608	-0.41977
	11.0345	-0.56647	-0.676	-0.41832
	11.0353	-0.5677	-0.67632	-0.41793
	11.0362	-0.56735	-0.67623	-0.41735
	11.037	-0.56729	-0.67679	-0.41656
	11.0379	-0.56781	-0.67715	-0.4161
	11.0387	-0.56703	-0.67762	-0.41549
	11.0395	-0.56674	-0.67958	-0.4146
	11.0404	-0.56806	-0.68021	-0.41384
	11.0412	-0.56904	-0.67936	-0.41328
	11.042	-0.56929	-0.68009	-0.41305
	11.0428	-0.56808	-0.67978	-0.41271
	11.0437	-0.56849	-0.67971	-0.41221
	11.0445	-0.5674	-0.67984	-0.41223
	11.0453	-0.56635	-0.6802	-0.41169
	11.0462	-0.56554	-0.68126	-0.41117
	11.047	-0.56355	-0.67992	-0.41072
	11.0478	-0.5627	-0.68029	-0.41048
	11.0487	-0.56219	-0.6807	-0.40939
	11.0495	-0.56246	-0.68034	-0.40954
	11.0503	-0.56142	-0.68091	-0.40926
	11.0512	-0.56217	-0.68257	-0.40814
	11.052	-0.56131	-0.68237	-0.40626
	11.0528	-0.55972	-0.68261	-0.40546
	11.0537	-0.55929	-0.68312	-0.40386
	11.0545	-0.55938	-0.68241	-0.40457
	11.0553	-0.55951	-0.68183	-0.40638
	11.0562	-0.55943	-0.68139	-0.40672
	11.057	-0.55946	-0.68157	-0.40702
	11.0578	-0.56029	-0.68136	-0.40764
	11.0587	-0.55975	-0.68041	-0.40734
	11.0595	-0.56023	-0.67917	-0.40749
	11.0603	-0.56059	-0.67734	-0.40812
	11.0612	-0.55847	-0.67672	-0.4088
	11.062	-0.55825	-0.67959	-0.40855
	11.0628	-0.55796	-0.67935	-0.40698
	11.0637	-0.55755	-0.67905	-0.40605
	11.0645	-0.55587	-0.67926	-0.40606
	11.0653	-0.55632	-0.67925	-0.40663
	11.0662	-0.55707	-0.67849	-0.40709
	11.067	-0.55923	-0.67837	-0.40816
	11.0678	-0.56111	-0.67991	-0.40915
	11.0687	-0.56138	-0.67993	-0.40905
	11.0695	-0.56103	-0.67893	-0.40921
	11.0703	-0.5614	-0.67801	-0.4092
	11.0712	-0.56216	-0.67632	-0.4094
	11.072	-0.56193	-0.67416	-0.41109
	11.0728	-0.56152	-0.67337	-0.41265
	11.0737	-0.56294	-0.67438	-0.41319
	11.0745	-0.5629	-0.67313	-0.41317
	11.0753	-0.56305	-0.67298	-0.41259
	11.0762	-0.56237	-0.67229	-0.41205
	11.077	-0.56167	-0.67236	-0.41175
	11.0778	-0.56155	-0.6727	-0.41277
	11.0787	-0.55954	-0.67278	-0.41252
	11.0795	-0.55963	-0.67306	-0.41261
	11.0803	-0.56048	-0.67443	-0.41214
	11.0812	-0.56082	-0.6752	-0.41086
	11.082	-0.56204	-0.67462	-0.41059
	11.0828	-0.56153	-0.67293	-0.41041
	11.0837	-0.56119	-0.67254	-0.41112
	11.0845	-0.56233	-0.67292	-0.41192
	11.0853	-0.56392	-0.67302	-0.41057
	11.0862	-0.56393	-0.67341	-0.40977
	11.087	-0.56387	-0.67446	-0.40997
	11.0878	-0.56296	-0.67413	-0.4092
	11.0887	-0.56128	-0.67234	-0.40802
	11.0895	-0.5614	-0.67233	-0.40883
	11.0903	-0.561	-0.67256	-0.40755
	11.0912	-0.56169	-0.67286	-0.40629
	11.092	-0.56171	-0.67386	-0.40552
	11.0928	-0.56145	-0.6744	-0.40334
	11.0937	-0.56091	-0.67585	-0.40299
	11.0945	-0.56077	-0.67558	-0.4037
	11.0953	-0.56124	-0.67649	-0.40383
	11.0962	-0.56161	-0.67699	-0.40324
	11.097	-0.56139	-0.67669	-0.40284
	11.0978	-0.56222	-0.67611	-0.40294
	11.0987	-0.56223	-0.67505	-0.40233
	11.0995	-0.56244	-0.67418	-0.40336
	11.1003	-0.56271	-0.67477	-0.40381
	11.1012	-0.56273	-0.67411	-0.40378
	11.102	-0.56232	-0.67409	-0.40493
	11.1028	-0.56268	-0.67583	-0.4056
	11.1037	-0.56307	-0.67624	-0.40614
	11.1045	-0.56338	-0.67631	-0.40735
	11.1053	-0.56362	-0.67687	-0.40717
	11.1062	-0.56281	-0.67764	-0.40779
	11.107	-0.56318	-0.67691	-0.40778
	11.1078	-0.56342	-0.67602	-0.40773
	11.1087	-0.56294	-0.67624	-0.40751
	11.1095	-0.5643	-0.67811	-0.40729
	11.1103	-0.56427	-0.67707	-0.40626
	11.1112	-0.56458	-0.67524	-0.40834
	11.112	-0.56433	-0.67556	-0.40929
	11.1128	-0.56509	-0.6763	-0.41025
	11.1137	-0.56703	-0.67683	-0.41187
	11.1145	-0.56758	-0.67646	-0.4114
	11.1153	-0.56663	-0.67597	-0.41165
	11.1162	-0.56635	-0.67714	-0.41198
	11.117	-0.56559	-0.67816	-0.41315
	11.1178	-0.5651	-0.67934	-0.41334
	11.1187	-0.56322	-0.68011	-0.41425
	11.1195	-0.56358	-0.6803	-0.414
	11.1203	-0.56478	-0.67995	-0.41287
	11.1212	-0.56457	-0.67888	-0.41302
	11.122	-0.56509	-0.67887	-0.41362
	11.1228	-0.56585	-0.67818	-0.41437
	11.1237	-0.56514	-0.67772	-0.41454
	11.1245	-0.56503	-0.6773	-0.4139
	11.1253	-0.56579	-0.67724	-0.41231
	11.1262	-0.56648	-0.67742	-0.41216
	11.127	-0.56743	-0.6765	-0.41265
	11.1278	-0.56742	-0.67572	-0.4122
	11.1287	-0.56702	-0.67599	-0.41213
	11.1295	-0.56755	-0.67591	-0.4134
	11.1303	-0.5679	-0.67572	-0.41367
	11.1312	-0.5685	-0.67648	-0.41374
	11.132	-0.56903	-0.67833	-0.41268
	11.1328	-0.56712	-0.67933	-0.41286
	11.1337	-0.56619	-0.67826	-0.41197
	11.1345	-0.56443	-0.67829	-0.41174
	11.1353	-0.56425	-0.67822	-0.41137
	11.1362	-0.56496	-0.67817	-0.41011
	11.137	-0.56543	-0.67706	-0.40884
	11.1378	-0.56722	-0.67593	-0.40731
	11.1387	-0.56732	-0.6755	-0.40541
	11.1395	-0.56802	-0.67621	-0.40467
	11.1403	-0.56807	-0.67718	-0.40395
	11.1412	-0.56782	-0.6788	-0.40311
	11.142	-0.56858	-0.67964	-0.40152
	11.1428	-0.56757	-0.67981	-0.40099
	11.1437	-0.5684	-0.68024	-0.40031
	11.1445	-0.56853	-0.68089	-0.40074
	11.1453	-0.56796	-0.68113	-0.40117
	11.1462	-0.56728	-0.68142	-0.40146
	11.147	-0.56519	-0.68088	-0.40109
	11.1478	-0.56421	-0.68092	-0.40147
	11.1487	-0.56388	-0.68221	-0.4015
	11.1495	-0.56461	-0.68136	-0.40074
	11.1503	-0.56405	-0.6808	-0.40041
	11.1511	-0.56393	-0.68041	-0.40107
	11.152	-0.56359	-0.68026	-0.40032
	11.1528	-0.56355	-0.6791	-0.40088
	11.1537	-0.56402	-0.67672	-0.40166
	11.1545	-0.56266	-0.67723	-0.40176
	11.1553	-0.56413	-0.67672	-0.40158
	11.1562	-0.56456	-0.67645	-0.40224
	11.157	-0.56472	-0.67707	-0.40222
	11.1578	-0.56413	-0.67643	-0.40368
	11.1586	-0.56206	-0.67683	-0.40413
	11.1595	-0.56318	-0.67686	-0.40626
	11.1603	-0.56227	-0.67674	-0.4056
	11.1611	-0.56206	-0.67631	-0.40507
	11.162	-0.56159	-0.6758	-0.40574
	11.1628	-0.56181	-0.67533	-0.40719
	11.1637	-0.56038	-0.67454	-0.40692
	11.1645	-0.55938	-0.67507	-0.40615
	11.1653	-0.56006	-0.67326	-0.40409
	11.1662	-0.55979	-0.67313	-0.40392
	11.167	-0.55949	-0.67267	-0.40362
	11.1678	-0.56073	-0.67268	-0.40321
	11.1686	-0.5612	-0.67319	-0.4027
	11.1695	-0.56193	-0.67322	-0.40248
	11.1703	-0.56116	-0.67363	-0.40285
	11.1712	-0.56089	-0.6746	-0.40249
	11.172	-0.56053	-0.67387	-0.4013
	11.1728	-0.56084	-0.67463	-0.40195
	11.1737	-0.56128	-0.67575	-0.40121
	11.1745	-0.56207	-0.67573	-0.39997
	11.1753	-0.56314	-0.67497	-0.40081
	11.1761	-0.56159	-0.6749	-0.40061
	11.177	-0.56168	-0.67427	-0.40028
	11.1778	-0.56096	-0.67442	-0.40042
	11.1786	-0.56181	-0.6753	-0.39943
	11.1795	-0.56209	-0.67562	-0.39932
	11.1803	-0.56166	-0.67614	-0.39875
	11.1812	-0.56202	-0.67578	-0.39983
	11.182	-0.56164	-0.67595	-0.40079
	11.1828	-0.56077	-0.67611	-0.40042
	11.1837	-0.56077	-0.67683	-0.39991
	11.1845	-0.56206	-0.67677	-0.40089
	11.1853	-0.56159	-0.67638	-0.4014
	11.1861	-0.56105	-0.67722	-0.40275
	11.187	-0.56107	-0.67747	-0.40224
	11.1878	-0.56013	-0.67812	-0.40336
	11.1887	-0.56039	-0.67773	-0.40357
	11.1895	-0.55979	-0.67764	-0.40315
	11.1903	-0.55998	-0.67656	-0.40289
	11.1912	-0.56018	-0.67678	-0.40342
	11.192	-0.56	-0.67619	-0.40318
	11.1928	-0.56025	-0.67557	-0.40336
	11.1936	-0.56117	-0.6749	-0.4024
	11.1945	-0.55943	-0.6742	-0.40272
	11.1953	-0.5586	-0.67596	-0.40249
	11.1961	-0.55879	-0.67634	-0.40114
	11.197	-0.55942	-0.67706	-0.4013
	11.1978	-0.56035	-0.67724	-0.40127
	11.1986	-0.55984	-0.67669	-0.40115
	11.1995	-0.55872	-0.67639	-0.40178
	11.2003	-0.55887	-0.67685	-0.40157
	11.2011	-0.55928	-0.67668	-0.40154
	11.202	-0.5602	-0.67506	-0.40086
	11.2028	-0.56022	-0.67421	-0.40226
	11.2036	-0.56078	-0.67402	-0.40366
	11.2045	-0.56054	-0.67347	-0.40373
	11.2053	-0.55899	-0.67461	-0.40254
	11.2061	-0.55884	-0.67315	-0.40183
	11.207	-0.56047	-0.67301	-0.4008
	11.2078	-0.56028	-0.67339	-0.40121
	11.2086	-0.56175	-0.67292	-0.39993
	11.2095	-0.56177	-0.67202	-0.40034
	11.2103	-0.56257	-0.67224	-0.4005
	11.2111	-0.56245	-0.67236	-0.40028
	11.212	-0.56383	-0.67142	-0.40046
	11.2128	-0.56323	-0.67132	-0.40076
	11.2136	-0.56183	-0.67145	-0.4014
	11.2145	-0.56025	-0.67174	-0.40311
	11.2153	-0.5611	-0.67216	-0.40407
	11.2161	-0.5626	-0.6722	-0.40536
	11.217	-0.56149	-0.672	-0.40584
	11.2178	-0.561	-0.67159	-0.40599
	11.2186	-0.56008	-0.67265	-0.40538
	11.2195	-0.56084	-0.67268	-0.40512
	11.2203	-0.5613	-0.6724	-0.40463
	11.2211	-0.56166	-0.67173	-0.40379
	11.222	-0.5621	-0.67183	-0.40423
	11.2228	-0.56209	-0.67233	-0.40442
	11.2236	-0.56177	-0.6722	-0.40393
	11.2245	-0.56091	-0.67245	-0.40365
	11.2253	-0.55862	-0.6733	-0.40379
	11.2261	-0.5601	-0.67276	-0.40458
	11.227	-0.56031	-0.67354	-0.40524
	11.2278	-0.55871	-0.67288	-0.40635
	11.2286	-0.55908	-0.67237	-0.4062
	11.2295	-0.55909	-0.67303	-0.40697
	11.2303	-0.55757	-0.67478	-0.40717
	11.2311	-0.55737	-0.674	-0.40784
	11.232	-0.55731	-0.67412	-0.40878
	11.2328	-0.55462	-0.67494	-0.40833
	11.2336	-0.55571	-0.67414	-0.40832
	11.2345	-0.55692	-0.67522	-0.40835
	11.2353	-0.55692	-0.67386	-0.40753
	11.2361	-0.55702	-0.67241	-0.40683
	11.237	-0.55588	-0.67164	-0.40548
	11.2378	-0.55647	-0.67112	-0.40525
	11.2386	-0.55679	-0.67063	-0.40394
	11.2395	-0.55732	-0.66975	-0.40366
	11.2403	-0.55773	-0.66945	-0.40336
	11.2411	-0.55713	-0.66978	-0.4024
	11.242	-0.5576	-0.66995	-0.40216
	11.2428	-0.55607	-0.66956	-0.40116
	11.2436	-0.55483	-0.6697	-0.401
	11.2445	-0.55461	-0.67122	-0.39926
	11.2453	-0.55662	-0.67175	-0.39857
	11.2461	-0.55792	-0.67123	-0.39825
	11.247	-0.55661	-0.67113	-0.39749
	11.2478	-0.55564	-0.67158	-0.3974
	11.2486	-0.55475	-0.67291	-0.39737
	11.2495	-0.55472	-0.6729	-0.39722
	11.2503	-0.55408	-0.67254	-0.39745
	11.2511	-0.55533	-0.67174	-0.39634
	11.252	-0.55491	-0.67225	-0.39612
	11.2528	-0.55497	-0.67223	-0.39639
	11.2536	-0.5555	-0.67264	-0.39616
	11.2545	-0.55485	-0.67386	-0.39561
	11.2553	-0.55429	-0.67386	-0.39539
	11.2561	-0.55428	-0.67602	-0.39549
	11.257	-0.55504	-0.67728	-0.39549
	11.2578	-0.55603	-0.67788	-0.39504
	11.2586	-0.55573	-0.67871	-0.39459
	11.2595	-0.55636	-0.67914	-0.39533
	11.2603	-0.55577	-0.67905	-0.39664
	11.2611	-0.55538	-0.67897	-0.39804
	11.262	-0.55621	-0.68008	-0.3994
	11.2628	-0.55714	-0.68012	-0.40092
	11.2636	-0.5577	-0.68001	-0.40124
	11.2645	-0.55833	-0.68022	-0.40161
	11.2653	-0.55748	-0.67875	-0.40237
	11.2661	-0.55662	-0.67806	-0.40225
	11.267	-0.55614	-0.67804	-0.40234
	11.2678	-0.55809	-0.67791	-0.40249
	11.2686	-0.55906	-0.67785	-0.4022
	11.2695	-0.56094	-0.67682	-0.4018
	11.2703	-0.56166	-0.67696	-0.40239
	11.2711	-0.56174	-0.67702	-0.40168
	11.272	-0.56185	-0.67657	-0.40152
	11.2728	-0.56205	-0.67599	-0.40116
	11.2736	-0.55977	-0.6772	-0.40029
	11.2745	-0.56092	-0.6773	-0.40068
	11.2753	-0.56242	-0.67681	-0.40127
	11.2761	-0.56279	-0.67652	-0.39996
	11.277	-0.56231	-0.67592	-0.39939
	11.2778	-0.56206	-0.67588	-0.3991
	11.2786	-0.56276	-0.67534	-0.39956
	11.2795	-0.56278	-0.67498	-0.39935
	11.2803	-0.56165	-0.67559	-0.39944
	11.2811	-0.5614	-0.67623	-0.3989
	11.282	-0.56023	-0.67652	-0.39808
	11.2828	-0.56023	-0.67528	-0.39844
	11.2836	-0.56009	-0.67451	-0.39851
	11.2845	-0.56024	-0.67496	-0.39888
	11.2853	-0.55942	-0.6747	-0.39909
	11.2861	-0.55859	-0.67545	-0.39956
	11.287	-0.55801	-0.67528	-0.39917
	11.2878	-0.55775	-0.67402	-0.3994
	11.2886	-0.55679	-0.67371	-0.39943
	11.2895	-0.55654	-0.67415	-0.39894
	11.2903	-0.55531	-0.67532	-0.39832
	11.2911	-0.5549	-0.67552	-0.39781
	11.292	-0.55411	-0.67498	-0.39755
	11.2928	-0.55345	-0.67565	-0.39797
	11.2936	-0.5535	-0.67589	-0.39771
	11.2945	-0.55506	-0.67468	-0.39819
	11.2953	-0.55512	-0.67345	-0.39823
	11.2961	-0.55509	-0.6741	-0.39723
	11.297	-0.55459	-0.67374	-0.39769
	11.2978	-0.556	-0.6733	-0.39785
	11.2986	-0.55614	-0.67358	-0.39834
	11.2995	-0.55485	-0.67385	-0.39891
	11.3003	-0.55519	-0.67421	-0.40001
	11.3011	-0.55557	-0.67352	-0.39992
	11.3019	-0.5564	-0.67307	-0.39952
	11.3028	-0.55658	-0.67285	-0.39942
	11.3036	-0.55616	-0.67312	-0.39842
	11.3044	-0.55477	-0.67406	-0.39775
	11.3053	-0.55421	-0.6737	-0.39723
	11.3061	-0.55407	-0.67339	-0.39634
	11.307	-0.55555	-0.67255	-0.39585
	11.3078	-0.55742	-0.67248	-0.39639
	11.3086	-0.55838	-0.6732	-0.39616
	11.3095	-0.55809	-0.67333	-0.39579
	11.3103	-0.5579	-0.67241	-0.3958
	11.3111	-0.55813	-0.67113	-0.39602
	11.3119	-0.55849	-0.66999	-0.39554
	11.3128	-0.55936	-0.66991	-0.39607
	11.3136	-0.55965	-0.66955	-0.39691
	11.3145	-0.55849	-0.66853	-0.39744
	11.3153	-0.55822	-0.66766	-0.39774
	11.3161	-0.55815	-0.66822	-0.39813
	11.317	-0.55664	-0.66835	-0.39844
	11.3178	-0.5573	-0.66919	-0.3992
	11.3186	-0.55633	-0.66956	-0.39947
	11.3194	-0.55691	-0.66903	-0.39895
	11.3203	-0.55635	-0.66889	-0.39839
	11.3211	-0.55629	-0.66868	-0.39786
	11.3219	-0.55632	-0.66987	-0.39702
	11.3228	-0.55578	-0.67003	-0.39725
	11.3236	-0.55635	-0.67005	-0.39688
	11.3245	-0.55697	-0.67007	-0.39622
	11.3253	-0.55815	-0.67018	-0.39598
	11.3261	-0.55851	-0.66997	-0.39658
	11.327	-0.5589	-0.66953	-0.39755
	11.3278	-0.55809	-0.66907	-0.39786
	11.3286	-0.55729	-0.66862	-0.39841
	11.3294	-0.5577	-0.6687	-0.39877
	11.3303	-0.5579	-0.66926	-0.39946
	11.3311	-0.55874	-0.66989	-0.40007
	11.332	-0.55918	-0.67018	-0.39963
	11.3328	-0.55902	-0.67032	-0.3997
	11.3336	-0.55827	-0.66996	-0.39873
	11.3345	-0.55705	-0.6695	-0.39715
	11.3353	-0.55731	-0.67026	-0.39664
	11.3361	-0.55782	-0.67157	-0.39713
	11.3369	-0.55734	-0.67198	-0.39698
	11.3378	-0.55607	-0.67184	-0.39751
	11.3386	-0.55395	-0.67127	-0.39842
	11.3394	-0.55387	-0.67088	-0.39877
	11.3403	-0.55196	-0.67036	-0.39885
	11.3411	-0.55236	-0.67061	-0.39916
	11.3419	-0.55245	-0.67081	-0.39955
	11.3428	-0.55245	-0.6691	-0.40111
	11.3436	-0.55176	-0.66839	-0.40146
	11.3444	-0.55133	-0.66792	-0.40181
	11.3453	-0.55111	-0.66747	-0.40237
	11.3461	-0.54978	-0.66637	-0.40315
	11.3469	-0.54955	-0.66624	-0.40346
	11.3478	-0.55099	-0.6677	-0.40331
	11.3486	-0.55199	-0.66799	-0.40374
	11.3494	-0.55159	-0.66818	-0.40352
	11.3503	-0.55068	-0.66889	-0.40372
	11.3511	-0.55019	-0.66871	-0.40349
	11.3519	-0.54824	-0.66849	-0.40316
	11.3528	-0.54762	-0.66767	-0.40373
	11.3536	-0.54653	-0.66708	-0.40407
	11.3544	-0.54736	-0.66716	-0.40501
	11.3553	-0.54801	-0.66727	-0.40637
	11.3561	-0.54904	-0.66746	-0.40654
	11.3569	-0.54845	-0.66723	-0.40608
	11.3578	-0.54817	-0.66628	-0.40559
	11.3586	-0.55053	-0.66554	-0.40433
	11.3594	-0.55272	-0.66522	-0.4028
	11.3603	-0.55449	-0.66483	-0.40194
	11.3611	-0.55681	-0.66521	-0.40163
	11.3619	-0.55613	-0.66436	-0.40127
	11.3628	-0.55688	-0.66436	-0.40026
	11.3636	-0.55683	-0.66469	-0.39944
	11.3644	-0.55741	-0.66533	-0.39858
	11.3653	-0.55897	-0.66539	-0.3987
	11.3661	-0.55837	-0.66589	-0.39865
	11.3669	-0.55845	-0.66697	-0.39855
	11.3678	-0.55832	-0.66816	-0.39767
	11.3686	-0.55739	-0.66752	-0.39719
	11.3694	-0.55785	-0.66834	-0.39711
	11.3703	-0.55861	-0.6688	-0.39603
	11.3711	-0.55882	-0.66814	-0.39515
	11.3719	-0.55984	-0.66825	-0.39487
	11.3728	-0.56107	-0.66861	-0.39461
	11.3736	-0.56205	-0.66938	-0.39438
	11.3744	-0.56221	-0.67057	-0.39367
	11.3753	-0.56214	-0.6713	-0.39374
	11.3761	-0.5625	-0.67145	-0.39319
	11.3769	-0.56131	-0.67062	-0.39222
	11.3778	-0.562	-0.67074	-0.39147
	11.3786	-0.56245	-0.6715	-0.39132
	11.3794	-0.56153	-0.67039	-0.39149
	11.3803	-0.5608	-0.66974	-0.39204
	11.3811	-0.55904	-0.66861	-0.3931
	11.3819	-0.55786	-0.66815	-0.39375
	11.3828	-0.55877	-0.66944	-0.39376
	11.3836	-0.55829	-0.66875	-0.3938
	11.3844	-0.55791	-0.66845	-0.39377
	11.3853	-0.55858	-0.66797	-0.39421
	11.3861	-0.55835	-0.66808	-0.39445
	11.3869	-0.55831	-0.6659	-0.39478
	11.3878	-0.5587	-0.66421	-0.39402
	11.3886	-0.55903	-0.66299	-0.39418
	11.3894	-0.55846	-0.66187	-0.39403
	11.3903	-0.55743	-0.66089	-0.39348
	11.3911	-0.55589	-0.66015	-0.39381
	11.3919	-0.55622	-0.66074	-0.39365
	11.3928	-0.55643	-0.65998	-0.39289
	11.3936	-0.55609	-0.65808	-0.39282
	11.3944	-0.55483	-0.65715	-0.39242
	11.3953	-0.55507	-0.65638	-0.39304
	11.3961	-0.55421	-0.65529	-0.39261
	11.3969	-0.55447	-0.65478	-0.39269
	11.3978	-0.55512	-0.65539	-0.39401
	11.3986	-0.55454	-0.65449	-0.39446
	11.3994	-0.5543	-0.65326	-0.39397
	11.4003	-0.55411	-0.65405	-0.39401
	11.4011	-0.55463	-0.65406	-0.39305
	11.4019	-0.55566	-0.6543	-0.39202
	11.4028	-0.55599	-0.65505	-0.39182
	11.4036	-0.55641	-0.65379	-0.39203
	11.4044	-0.55599	-0.65357	-0.39252
	11.4053	-0.556	-0.65397	-0.39252
	11.4061	-0.55503	-0.6543	-0.3929
	11.4069	-0.55439	-0.65405	-0.39236
	11.4078	-0.55572	-0.65482	-0.39177
	11.4086	-0.55576	-0.65503	-0.39135
	11.4094	-0.5563	-0.65471	-0.39044
	11.4103	-0.55675	-0.65603	-0.39058
	11.4111	-0.55892	-0.65601	-0.39066
	11.4119	-0.55893	-0.65594	-0.39059
	11.4128	-0.5596	-0.65544	-0.39029
	11.4136	-0.55826	-0.6564	-0.39121
	11.4144	-0.55815	-0.65737	-0.39155
	11.4153	-0.55864	-0.65812	-0.39103
	11.4161	-0.55835	-0.6597	-0.39025
	11.4169	-0.55865	-0.66051	-0.39057
	11.4178	-0.55867	-0.66161	-0.39103
	11.4186	-0.5585	-0.66102	-0.39044
	11.4194	-0.55838	-0.66085	-0.38987
	11.4203	-0.55819	-0.66024	-0.39017
	11.4211	-0.55938	-0.65951	-0.39075
	11.4219	-0.56023	-0.66089	-0.39204
	11.4228	-0.55947	-0.66188	-0.39265
	11.4236	-0.55931	-0.66265	-0.39302
	11.4244	-0.55811	-0.66279	-0.39313
	11.4253	-0.55811	-0.66347	-0.39383
	11.4261	-0.55885	-0.66426	-0.39381
	11.4269	-0.55972	-0.66424	-0.39301
	11.4278	-0.56049	-0.66524	-0.39348
	11.4286	-0.55959	-0.66587	-0.39385
	11.4294	-0.55965	-0.66653	-0.39389
	11.4303	-0.55932	-0.66716	-0.39413
	11.4311	-0.55793	-0.6664	-0.39333
	11.4319	-0.55578	-0.66644	-0.39319
	11.4328	-0.5562	-0.66684	-0.39315
	11.4336	-0.55419	-0.66711	-0.39402
	11.4344	-0.55465	-0.6661	-0.39446
	11.4353	-0.55546	-0.66616	-0.39363
	11.4361	-0.55673	-0.66637	-0.3941
	11.4369	-0.55802	-0.66602	-0.39471
	11.4378	-0.55884	-0.66613	-0.39408
	11.4386	-0.55957	-0.66537	-0.39345
	11.4394	-0.56038	-0.66515	-0.39254
	11.4403	-0.56108	-0.66549	-0.39198
	11.4411	-0.56062	-0.66662	-0.39172
	11.4419	-0.56083	-0.66806	-0.39132
	11.4428	-0.55993	-0.66738	-0.39082
	11.4436	-0.56011	-0.66739	-0.39086
	11.4444	-0.55952	-0.66606	-0.39028
	11.4452	-0.55959	-0.66594	-0.38979
	11.4461	-0.55878	-0.66566	-0.38951
	11.4469	-0.55746	-0.66431	-0.39031
	11.4477	-0.55807	-0.66387	-0.39121
	11.4486	-0.55799	-0.66288	-0.39099
	11.4494	-0.55836	-0.66272	-0.39103
	11.4503	-0.55785	-0.66184	-0.3913
	11.4511	-0.55799	-0.66153	-0.39149
	11.4519	-0.55991	-0.66187	-0.39245
	11.4527	-0.56158	-0.66203	-0.39227
	11.4536	-0.56243	-0.66176	-0.39232
	11.4544	-0.56294	-0.66116	-0.39252
	11.4552	-0.56326	-0.661	-0.39281
	11.4561	-0.56203	-0.65937	-0.39426
	11.4569	-0.56074	-0.6593	-0.3948
	11.4578	-0.56041	-0.65867	-0.39493
	11.4586	-0.55981	-0.65786	-0.39472
	11.4594	-0.55879	-0.65817	-0.39465
	11.4603	-0.55769	-0.65796	-0.39589
	11.4611	-0.55689	-0.65812	-0.39634
	11.4619	-0.55731	-0.65866	-0.39608
	11.4627	-0.55729	-0.65746	-0.39605
	11.4636	-0.55756	-0.65697	-0.39543
	11.4644	-0.55673	-0.65649	-0.39437
	11.4652	-0.55766	-0.65731	-0.39354
	11.4661	-0.55925	-0.65742	-0.39344
	11.4669	-0.56062	-0.65835	-0.39315
	11.4678	-0.56055	-0.65887	-0.39243
	11.4686	-0.55909	-0.65909	-0.39276
	11.4694	-0.55769	-0.6588	-0.39205
	11.4703	-0.55713	-0.65813	-0.39121
	11.4711	-0.55729	-0.65872	-0.39141
	11.4719	-0.55695	-0.65924	-0.39163
	11.4727	-0.5569	-0.65949	-0.39126
	11.4736	-0.5562	-0.65938	-0.39129
	11.4744	-0.55613	-0.65901	-0.39093
	11.4753	-0.55703	-0.65947	-0.38998
	11.4761	-0.55676	-0.65985	-0.38904
	11.4769	-0.55691	-0.65948	-0.38814
	11.4778	-0.55626	-0.65891	-0.38821
	11.4786	-0.55612	-0.65854	-0.38832
	11.4794	-0.5571	-0.65828	-0.38933
	11.4802	-0.5579	-0.65848	-0.38963
	11.4811	-0.55811	-0.65949	-0.38914
	11.4819	-0.55761	-0.66007	-0.39007
	11.4827	-0.55817	-0.66031	-0.39124
	11.4836	-0.55755	-0.661	-0.39096
	11.4844	-0.55737	-0.66148	-0.39096
	11.4853	-0.55804	-0.66147	-0.39151
	11.4861	-0.55677	-0.66109	-0.39213
	11.4869	-0.5549	-0.66101	-0.39231
	11.4877	-0.55465	-0.65966	-0.39146
	11.4886	-0.55526	-0.65878	-0.39108
	11.4894	-0.5538	-0.65804	-0.39027
	11.4902	-0.55368	-0.65784	-0.39062
	11.4911	-0.55264	-0.65837	-0.39148
	11.4919	-0.55243	-0.65811	-0.39096
	11.4927	-0.55241	-0.65611	-0.39018
	11.4936	-0.55246	-0.65589	-0.3901
	11.4944	-0.55231	-0.65547	-0.38941
	11.4952	-0.55203	-0.65479	-0.389
	11.4961	-0.55124	-0.6524	-0.38928
	11.4969	-0.55158	-0.65167	-0.38945
	11.4977	-0.55205	-0.65367	-0.38954
	11.4986	-0.55359	-0.65385	-0.38876
	11.4994	-0.55337	-0.65442	-0.38882
	11.5002	-0.5523	-0.65523	-0.38799
	11.5011	-0.55259	-0.65432	-0.38691
	11.5019	-0.55298	-0.65309	-0.38631
	11.5027	-0.55339	-0.65153	-0.38591
	11.5036	-0.55379	-0.65008	-0.38534
	11.5044	-0.5548	-0.64936	-0.38555
	11.5052	-0.5547	-0.64902	-0.38527
	11.5061	-0.554	-0.64863	-0.38496
	11.5069	-0.55516	-0.64805	-0.3849
	11.5077	-0.55565	-0.648	-0.38487
	11.5086	-0.55473	-0.64736	-0.38574
	11.5094	-0.55541	-0.64689	-0.38562
	11.5102	-0.55672	-0.64616	-0.38518
	11.5111	-0.55797	-0.64629	-0.3851
	11.5119	-0.55948	-0.64623	-0.38501
	11.5127	-0.55915	-0.64595	-0.38522
	11.5136	-0.55888	-0.64693	-0.38571
	11.5144	-0.55831	-0.64674	-0.38565
	11.5152	-0.55783	-0.64669	-0.38624
	11.5161	-0.5563	-0.64714	-0.38627
	11.5169	-0.55624	-0.64901	-0.38563
	11.5177	-0.55636	-0.64922	-0.38476
	11.5186	-0.55618	-0.64851	-0.38516
	11.5194	-0.5549	-0.64811	-0.3859
	11.5202	-0.55498	-0.6472	-0.38598
	11.5211	-0.5541	-0.64676	-0.38662
	11.5219	-0.55215	-0.6468	-0.38844
	11.5227	-0.55138	-0.64785	-0.38991
	11.5236	-0.5515	-0.64838	-0.39012
	11.5244	-0.55028	-0.6478	-0.38976
	11.5252	-0.54982	-0.64778	-0.38946
	11.5261	-0.54994	-0.64747	-0.38999
	11.5269	-0.55096	-0.64691	-0.3906
	11.5277	-0.54996	-0.64578	-0.39048
	11.5286	-0.55031	-0.64493	-0.39061
	11.5294	-0.55085	-0.64521	-0.39016
	11.5302	-0.54917	-0.64585	-0.3898
	11.5311	-0.54919	-0.64715	-0.39041
	11.5319	-0.54843	-0.64742	-0.39087
	11.5327	-0.54739	-0.64796	-0.39107
	11.5336	-0.54767	-0.64755	-0.39183
	11.5344	-0.54862	-0.64812	-0.39252
	11.5352	-0.54884	-0.64776	-0.39179
	11.5361	-0.5488	-0.64824	-0.39099
	11.5369	-0.55062	-0.64858	-0.39129
	11.5377	-0.55144	-0.64885	-0.39206
	11.5386	-0.55012	-0.64869	-0.39315
	11.5394	-0.55103	-0.64854	-0.39262
	11.5402	-0.55155	-0.6478	-0.39181
	11.5411	-0.55181	-0.64785	-0.39199
	11.5419	-0.55457	-0.64787	-0.39289
	11.5427	-0.55574	-0.64756	-0.3923
	11.5436	-0.55573	-0.64712	-0.39055
	11.5444	-0.55487	-0.64752	-0.38974
	11.5452	-0.55543	-0.64892	-0.3904
	11.5461	-0.55551	-0.6496	-0.39035
	11.5469	-0.55527	-0.64998	-0.38966
	11.5477	-0.55471	-0.65108	-0.38892
	11.5486	-0.55444	-0.65194	-0.38934
	11.5494	-0.55444	-0.6518	-0.38912
	11.5502	-0.55448	-0.65231	-0.3889
	11.5511	-0.55442	-0.65273	-0.38914
	11.5519	-0.55385	-0.6527	-0.38853
	11.5527	-0.5538	-0.65307	-0.3879
	11.5536	-0.55467	-0.65268	-0.38762
	11.5544	-0.55407	-0.65276	-0.38695
	11.5552	-0.55279	-0.65205	-0.38552
	11.5561	-0.55228	-0.65205	-0.38571
	11.5569	-0.5524	-0.65197	-0.38637
	11.5577	-0.55268	-0.65213	-0.38662
	11.5586	-0.55276	-0.65123	-0.38591
	11.5594	-0.55439	-0.65211	-0.38571
	11.5602	-0.55396	-0.65221	-0.3862
	11.5611	-0.554	-0.65302	-0.38641
	11.5619	-0.55352	-0.65353	-0.38551
	11.5627	-0.55026	-0.65313	-0.38412
	11.5636	-0.5493	-0.65335	-0.38347
	11.5644	-0.55059	-0.65318	-0.38398
	11.5652	-0.55151	-0.65217	-0.38365
	11.5661	-0.55196	-0.65148	-0.38249
	11.5669	-0.55187	-0.65055	-0.38327
	11.5677	-0.55218	-0.65051	-0.38452
	11.5686	-0.55255	-0.64952	-0.38488
	11.5694	-0.55439	-0.6482	-0.38531
	11.5702	-0.55572	-0.64755	-0.38566
	11.5711	-0.55666	-0.64665	-0.38568
	11.5719	-0.55791	-0.6468	-0.38548
	11.5727	-0.55874	-0.64618	-0.38566
	11.5736	-0.56036	-0.64534	-0.38596
	11.5744	-0.56014	-0.64392	-0.38571
	11.5752	-0.56149	-0.64384	-0.38508
	11.5761	-0.56338	-0.64372	-0.3857
	11.5769	-0.56363	-0.64302	-0.3858
	11.5777	-0.56559	-0.64261	-0.3846
	11.5786	-0.56534	-0.64166	-0.38384
	11.5794	-0.56529	-0.64112	-0.38403
	11.5802	-0.56435	-0.64025	-0.38313
	11.5811	-0.56374	-0.63959	-0.38225
	11.5819	-0.56261	-0.63946	-0.38292
	11.5827	-0.56281	-0.63969	-0.3838
	11.5836	-0.56497	-0.63951	-0.38423
	11.5844	-0.56624	-0.63942	-0.38423
	11.5852	-0.5656	-0.63889	-0.38436
	11.5861	-0.56532	-0.63906	-0.38461
	11.5869	-0.56501	-0.63912	-0.38519
	11.5877	-0.56432	-0.6393	-0.38537
	11.5885	-0.56401	-0.63808	-0.38453
	11.5894	-0.56474	-0.63828	-0.38322
	11.5902	-0.56322	-0.63977	-0.38171
	11.591	-0.5617	-0.64058	-0.38122
	11.5919	-0.56108	-0.64191	-0.38173
	11.5927	-0.56051	-0.64052	-0.38239
	11.5936	-0.56051	-0.64006	-0.38252
	11.5944	-0.55935	-0.63959	-0.38253
	11.5952	-0.55941	-0.64047	-0.38277
	11.596	-0.55942	-0.64153	-0.38347
	11.5969	-0.55887	-0.64147	-0.38334
	11.5977	-0.55907	-0.64152	-0.38337
	11.5985	-0.55783	-0.64051	-0.38453
	11.5994	-0.55805	-0.63955	-0.38456
	11.6002	-0.55839	-0.63915	-0.38391
	11.6011	-0.55888	-0.63936	-0.38464
	11.6019	-0.55935	-0.63944	-0.38453
	11.6027	-0.56137	-0.63889	-0.38407
	11.6036	-0.56105	-0.63722	-0.38388
	11.6044	-0.56036	-0.63641	-0.38325
	11.6052	-0.56001	-0.6354	-0.38307
	11.606	-0.56111	-0.63511	-0.38263
	11.6069	-0.5614	-0.63443	-0.38287
	11.6077	-0.56166	-0.63434	-0.38364
	11.6085	-0.56239	-0.63431	-0.38381
	11.6094	-0.56275	-0.634	-0.38462
	11.6102	-0.5621	-0.63394	-0.38578
	11.6111	-0.56207	-0.63286	-0.38631
	11.6119	-0.56233	-0.63168	-0.38643
	11.6127	-0.56144	-0.63038	-0.38658
	11.6136	-0.56129	-0.62997	-0.38672
	11.6144	-0.56096	-0.62985	-0.38648
	11.6152	-0.56039	-0.62964	-0.38606
	11.616	-0.55995	-0.62937	-0.38641
	11.6169	-0.55847	-0.6286	-0.38687
	11.6177	-0.55828	-0.62848	-0.38674
	11.6186	-0.55897	-0.62871	-0.38684
	11.6194	-0.55794	-0.6291	-0.38669
	11.6202	-0.55791	-0.62986	-0.38664
	11.6211	-0.55717	-0.63125	-0.38698
	11.6219	-0.5566	-0.6313	-0.38697
	11.6227	-0.55536	-0.63079	-0.3872
	11.6235	-0.55378	-0.63052	-0.3867
	11.6244	-0.55495	-0.63144	-0.38652
	11.6252	-0.55293	-0.63269	-0.38688
	11.626	-0.55255	-0.63379	-0.38707
	11.6269	-0.55149	-0.63455	-0.38719
	11.6277	-0.55198	-0.63523	-0.387
	11.6286	-0.55199	-0.63453	-0.38641
	11.6294	-0.55152	-0.63376	-0.38516
	11.6302	-0.55128	-0.63437	-0.38341
	11.6311	-0.55231	-0.63412	-0.38344
	11.6319	-0.55365	-0.63445	-0.38407
	11.6327	-0.55461	-0.63527	-0.38442
	11.6335	-0.55558	-0.63527	-0.38388
	11.6344	-0.55647	-0.63593	-0.38283
	11.6352	-0.55775	-0.6362	-0.38243
	11.636	-0.55727	-0.63625	-0.38284
	11.6369	-0.55765	-0.63586	-0.38255
	11.6377	-0.55806	-0.63493	-0.38205
	11.6385	-0.55833	-0.63481	-0.38217
	11.6394	-0.55738	-0.6354	-0.38159
	11.6402	-0.55876	-0.63545	-0.38181
	11.641	-0.5584	-0.63517	-0.38245
	11.6419	-0.5583	-0.63465	-0.38265
	11.6427	-0.55836	-0.63307	-0.38289
	11.6435	-0.55852	-0.63388	-0.3833
	11.6444	-0.55855	-0.63478	-0.38347
	11.6452	-0.5576	-0.63488	-0.38309
	11.646	-0.55929	-0.63461	-0.38202
	11.6469	-0.55994	-0.63398	-0.38148
	11.6477	-0.56035	-0.63365	-0.38167
	11.6485	-0.55962	-0.63338	-0.3811
	11.6494	-0.55923	-0.63323	-0.38049
	11.6502	-0.55934	-0.63235	-0.38118
	11.651	-0.55993	-0.63235	-0.38245
	11.6519	-0.55737	-0.63257	-0.38237
	11.6527	-0.55516	-0.6328	-0.38149
	11.6535	-0.55446	-0.63249	-0.38091
	11.6544	-0.55418	-0.63206	-0.3805
	11.6552	-0.5532	-0.63211	-0.38116
	11.656	-0.55112	-0.63154	-0.38186
	11.6569	-0.55138	-0.63158	-0.38175
	11.6577	-0.5517	-0.63191	-0.38156
	11.6585	-0.55176	-0.63113	-0.38102
	11.6594	-0.5501	-0.62996	-0.3814
	11.6602	-0.54954	-0.62911	-0.38219
	11.661	-0.54858	-0.6291	-0.38146
	11.6619	-0.54865	-0.62872	-0.38133
	11.6627	-0.54891	-0.62736	-0.38223
	11.6635	-0.54977	-0.62774	-0.38147
	11.6644	-0.5503	-0.62791	-0.38068
	11.6652	-0.55076	-0.6273	-0.3803
	11.666	-0.55136	-0.62616	-0.38088
	11.6669	-0.55215	-0.62505	-0.38269
	11.6677	-0.55294	-0.62348	-0.38348
	11.6685	-0.55436	-0.62211	-0.38342
	11.6694	-0.55524	-0.62131	-0.38415
	11.6702	-0.55486	-0.62084	-0.38422
	11.671	-0.55548	-0.62118	-0.38347
	11.6719	-0.55476	-0.62068	-0.3828
	11.6727	-0.55583	-0.62017	-0.3826
	11.6735	-0.5574	-0.62029	-0.38317
	11.6744	-0.5576	-0.62105	-0.38376
	11.6752	-0.55688	-0.62227	-0.38425
	11.676	-0.55757	-0.62177	-0.38417
	11.6769	-0.55807	-0.62116	-0.38424
	11.6777	-0.55836	-0.6207	-0.38441
	11.6785	-0.55858	-0.62029	-0.38417
	11.6794	-0.55947	-0.62081	-0.38469
	11.6802	-0.56098	-0.62144	-0.3846
	11.681	-0.56239	-0.62178	-0.38459
	11.6819	-0.56308	-0.6216	-0.38545
	11.6827	-0.56327	-0.62209	-0.38528
	11.6835	-0.56302	-0.62303	-0.3847
	11.6844	-0.56212	-0.62249	-0.38584
	11.6852	-0.56237	-0.62166	-0.38677
	11.686	-0.56277	-0.62187	-0.3875
	11.6869	-0.56291	-0.62156	-0.38708
	11.6877	-0.56219	-0.62144	-0.38588
	11.6885	-0.56105	-0.62243	-0.38574
	11.6894	-0.55936	-0.62222	-0.38575
	11.6902	-0.55923	-0.62328	-0.38528
	11.691	-0.56005	-0.62431	-0.38482
	11.6919	-0.55899	-0.62522	-0.38505
	11.6927	-0.55862	-0.62491	-0.38506
	11.6935	-0.55878	-0.62454	-0.38511
	11.6944	-0.55822	-0.62407	-0.38565
	11.6952	-0.55704	-0.62282	-0.38562
	11.696	-0.55744	-0.62048	-0.38535
	11.6969	-0.5578	-0.62032	-0.38501
	11.6977	-0.55913	-0.62077	-0.3845
	11.6985	-0.55937	-0.62072	-0.38404
	11.6994	-0.55872	-0.62023	-0.38368
	11.7002	-0.55795	-0.62074	-0.38345
	11.701	-0.55631	-0.61996	-0.38383
	11.7019	-0.55515	-0.61915	-0.38403
	11.7027	-0.55385	-0.61935	-0.38363
	11.7035	-0.55366	-0.619	-0.38317
	11.7044	-0.55306	-0.61854	-0.38312
	11.7052	-0.55332	-0.61869	-0.38279
	11.706	-0.55351	-0.61835	-0.38247
	11.7069	-0.55376	-0.61778	-0.38266
	11.7077	-0.55348	-0.61795	-0.38305
	11.7085	-0.55278	-0.61788	-0.38328
	11.7094	-0.5521	-0.61763	-0.38268
	11.7102	-0.55196	-0.61869	-0.3819
	11.711	-0.55107	-0.61726	-0.38208
	11.7119	-0.55134	-0.6168	-0.38303
	11.7127	-0.55108	-0.61679	-0.38364
	11.7135	-0.55138	-0.61754	-0.38454
	11.7144	-0.55105	-0.6183	-0.38499
	11.7152	-0.55124	-0.61876	-0.38466
	11.716	-0.55226	-0.61924	-0.38393
	11.7169	-0.55177	-0.61989	-0.3834
	11.7177	-0.55089	-0.62033	-0.38376
	11.7185	-0.55015	-0.62026	-0.3847
	11.7194	-0.55078	-0.6201	-0.38575
	11.7202	-0.55204	-0.62013	-0.38658
	11.721	-0.55271	-0.61961	-0.3865
	11.7219	-0.55297	-0.61998	-0.38598
	11.7227	-0.55327	-0.61992	-0.3861
	11.7235	-0.55416	-0.61885	-0.38693
	11.7244	-0.55346	-0.61814	-0.388
	11.7252	-0.55397	-0.6175	-0.38851
	11.726	-0.55467	-0.61733	-0.38859
	11.7269	-0.55615	-0.61658	-0.38816
	11.7277	-0.55555	-0.61523	-0.38768
	11.7285	-0.55535	-0.61474	-0.38718
	11.7294	-0.55539	-0.6156	-0.38718
	11.7302	-0.55486	-0.6162	-0.38771
	11.731	-0.55482	-0.61597	-0.38876
	11.7319	-0.55482	-0.6164	-0.38965
	11.7327	-0.5544	-0.6152	-0.38972
	11.7335	-0.55443	-0.61403	-0.38966
	11.7344	-0.55473	-0.61323	-0.38993
	11.7352	-0.55489	-0.61226	-0.38974
	11.736	-0.55409	-0.61116	-0.38935
	11.7369	-0.55255	-0.6101	-0.38993
	11.7377	-0.55206	-0.61036	-0.39069
	11.7385	-0.55282	-0.60951	-0.39087
	11.7393	-0.55342	-0.60843	-0.39019
	11.7402	-0.55246	-0.60733	-0.38934
	11.741	-0.55096	-0.60613	-0.38895
	11.7418	-0.55113	-0.60605	-0.38901
	11.7427	-0.55267	-0.60545	-0.38893
	11.7435	-0.55264	-0.60393	-0.38885
	11.7444	-0.5521	-0.60365	-0.3883
	11.7452	-0.55221	-0.60286	-0.38762
	11.746	-0.55239	-0.60336	-0.38709
	11.7469	-0.5523	-0.60419	-0.38685
	11.7477	-0.55172	-0.60454	-0.38758
	11.7485	-0.55099	-0.60487	-0.38757
	11.7493	-0.55168	-0.60521	-0.38702
	11.7502	-0.55328	-0.60391	-0.38677
	11.751	-0.55495	-0.60294	-0.3872
	11.7518	-0.55549	-0.60259	-0.38735
	11.7527	-0.55698	-0.60157	-0.38701
	11.7535	-0.55776	-0.60175	-0.38724
	11.7544	-0.55756	-0.60161	-0.38721
	11.7552	-0.55725	-0.59995	-0.38633
	11.756	-0.55784	-0.5983	-0.38613
	11.7569	-0.55804	-0.59774	-0.38568
	11.7577	-0.55822	-0.59811	-0.38524
	11.7585	-0.55935	-0.59738	-0.38593
	11.7593	-0.55912	-0.59729	-0.38584
	11.7602	-0.55832	-0.59806	-0.38604
	11.761	-0.55912	-0.59865	-0.3864
	11.7619	-0.55976	-0.5993	-0.38659
	11.7627	-0.55901	-0.59911	-0.38734
	11.7635	-0.55786	-0.59876	-0.38819
	11.7644	-0.55763	-0.59985	-0.38791
	11.7652	-0.55811	-0.60102	-0.38742
	11.766	-0.5583	-0.60321	-0.38756
	11.7668	-0.55717	-0.60347	-0.38769
	11.7677	-0.55749	-0.60182	-0.38752
	11.7685	-0.55718	-0.60121	-0.38692
	11.7693	-0.55768	-0.60116	-0.3866
	11.7702	-0.55679	-0.60016	-0.38669
	11.771	-0.55598	-0.59936	-0.38718
	11.7719	-0.55497	-0.59853	-0.38627
	11.7727	-0.55491	-0.59788	-0.38534
	11.7735	-0.5541	-0.59844	-0.38542
	11.7744	-0.55424	-0.59845	-0.38515
	11.7752	-0.55546	-0.59903	-0.38495
	11.776	-0.55531	-0.60049	-0.38511
	11.7768	-0.55446	-0.60094	-0.38472
	11.7777	-0.55526	-0.60067	-0.38463
	11.7785	-0.55609	-0.6002	-0.38501
	11.7794	-0.55613	-0.5996	-0.38441
	11.7802	-0.55593	-0.59828	-0.38387
	11.781	-0.55725	-0.59666	-0.38354
	11.7818	-0.55661	-0.59672	-0.3835
	11.7827	-0.55691	-0.59689	-0.38386
	11.7835	-0.55718	-0.59597	-0.38355
	11.7843	-0.55911	-0.59528	-0.38257
	11.7852	-0.55913	-0.59457	-0.38204
	11.786	-0.55892	-0.59309	-0.38187
	11.7868	-0.55965	-0.59105	-0.38156
	11.7877	-0.5605	-0.58968	-0.38076
	11.7885	-0.55984	-0.58942	-0.37934
	11.7893	-0.56052	-0.58957	-0.37853
	11.7902	-0.56069	-0.58955	-0.37816
	11.791	-0.56079	-0.59011	-0.37823
	11.7918	-0.56053	-0.59097	-0.37761
	11.7927	-0.56137	-0.59081	-0.37783
	11.7935	-0.56169	-0.59026	-0.37832
	11.7943	-0.56228	-0.58976	-0.37834
	11.7952	-0.56178	-0.58999	-0.3786
	11.796	-0.56145	-0.58955	-0.37895
	11.7968	-0.56123	-0.58858	-0.37893
	11.7977	-0.56205	-0.58784	-0.37876
	11.7985	-0.56196	-0.58683	-0.37859
	11.7993	-0.56126	-0.58694	-0.37819
	11.8002	-0.56085	-0.58754	-0.37901
	11.801	-0.56092	-0.58825	-0.37988
	11.8018	-0.55987	-0.58888	-0.37964
	11.8027	-0.56001	-0.58862	-0.37934
	11.8035	-0.55942	-0.5882	-0.37841
	11.8043	-0.55807	-0.58892	-0.37844
	11.8052	-0.55636	-0.58942	-0.37883
	11.806	-0.55745	-0.58895	-0.37859
	11.8068	-0.55786	-0.58867	-0.37873
	11.8077	-0.55718	-0.58862	-0.37965
	11.8085	-0.55708	-0.58871	-0.38068
	11.8093	-0.55709	-0.58903	-0.3812
	11.8102	-0.55611	-0.58861	-0.38171
	11.811	-0.55652	-0.58733	-0.38305
	11.8118	-0.5565	-0.58601	-0.38315
	11.8127	-0.55579	-0.58378	-0.38352
	11.8135	-0.5554	-0.58333	-0.38405
	11.8143	-0.55452	-0.58283	-0.38421
	11.8152	-0.55427	-0.58234	-0.38381
	11.816	-0.55405	-0.58117	-0.38324
	11.8168	-0.5545	-0.57987	-0.38363
	11.8177	-0.5542	-0.57968	-0.38452
	11.8185	-0.55408	-0.58044	-0.385
	11.8193	-0.55404	-0.58078	-0.38513
	11.8202	-0.55596	-0.58043	-0.38536
	11.821	-0.55749	-0.57925	-0.38424
	11.8218	-0.55805	-0.57799	-0.38396
	11.8227	-0.55809	-0.57749	-0.38429
	11.8235	-0.55777	-0.57749	-0.38364
	11.8243	-0.55826	-0.57712	-0.38332
	11.8252	-0.55925	-0.57616	-0.38323
	11.826	-0.55837	-0.57551	-0.38325
	11.8268	-0.55722	-0.57604	-0.38416
	11.8277	-0.55646	-0.57683	-0.3846
	11.8285	-0.55534	-0.57677	-0.38451
	11.8293	-0.55596	-0.57623	-0.38463
	11.8302	-0.55583	-0.57564	-0.38487
	11.831	-0.55548	-0.57577	-0.38566
	11.8318	-0.55486	-0.57658	-0.38602
	11.8327	-0.55473	-0.57668	-0.38691
	11.8335	-0.55539	-0.57763	-0.3877
	11.8343	-0.55585	-0.57749	-0.3882
	11.8352	-0.55564	-0.57768	-0.38806
	11.836	-0.55598	-0.57783	-0.38877
	11.8368	-0.55623	-0.57898	-0.38943
	11.8377	-0.55497	-0.57977	-0.38882
	11.8385	-0.55633	-0.57891	-0.38798
	11.8393	-0.5574	-0.57786	-0.38809
	11.8402	-0.55743	-0.57675	-0.3878
	11.841	-0.55546	-0.57589	-0.38737
	11.8418	-0.55476	-0.57672	-0.38796
	11.8427	-0.55442	-0.5773	-0.38829
	11.8435	-0.55575	-0.5771	-0.38766
	11.8443	-0.55714	-0.57585	-0.38813
	11.8452	-0.55684	-0.57499	-0.38957
	11.846	-0.55731	-0.5742	-0.38936
	11.8468	-0.55777	-0.57355	-0.38875
	11.8477	-0.55763	-0.57219	-0.38819
	11.8485	-0.55786	-0.5698	-0.38838
	11.8493	-0.55967	-0.5691	-0.38772
	11.8502	-0.55976	-0.56889	-0.38715
	11.851	-0.55978	-0.5682	-0.388
	11.8518	-0.55971	-0.56755	-0.38722
	11.8527	-0.56066	-0.56886	-0.38591
	11.8535	-0.56054	-0.56945	-0.38477
	11.8543	-0.56048	-0.56961	-0.38413
	11.8552	-0.5594	-0.56982	-0.38334
	11.856	-0.56021	-0.57007	-0.38248
	11.8568	-0.55924	-0.56951	-0.38139
	11.8577	-0.55856	-0.56775	-0.38045
	11.8585	-0.55979	-0.56692	-0.38012
	11.8593	-0.55949	-0.56698	-0.3796
	11.8602	-0.55846	-0.5674	-0.37941
	11.861	-0.5582	-0.56791	-0.38044
	11.8618	-0.55943	-0.5679	-0.38052
	11.8627	-0.55839	-0.56764	-0.38032
	11.8635	-0.55763	-0.56744	-0.37964
	11.8643	-0.5561	-0.5674	-0.3804
	11.8652	-0.55494	-0.56778	-0.38037
	11.866	-0.55508	-0.56681	-0.37875
	11.8668	-0.55389	-0.56598	-0.37793
	11.8677	-0.55371	-0.56522	-0.37749
	11.8685	-0.55441	-0.56473	-0.37737
	11.8693	-0.55462	-0.56587	-0.37702
	11.8702	-0.55431	-0.56589	-0.37759
	11.871	-0.55414	-0.56604	-0.37754
	11.8718	-0.55394	-0.56657	-0.3768
	11.8727	-0.55386	-0.56619	-0.37681
	11.8735	-0.55278	-0.56346	-0.37733
	11.8743	-0.55398	-0.56269	-0.37773
	11.8752	-0.55412	-0.56244	-0.37779
	11.876	-0.55581	-0.56174	-0.37827
	11.8768	-0.55577	-0.5603	-0.37882
	11.8777	-0.55661	-0.56003	-0.37933
	11.8785	-0.55611	-0.55995	-0.37978
	11.8793	-0.55547	-0.55877	-0.37975
	11.8802	-0.55563	-0.5582	-0.37972
	11.881	-0.55574	-0.55793	-0.37977
	11.8818	-0.55604	-0.55811	-0.37948
	11.8826	-0.55613	-0.55807	-0.37928
	11.8835	-0.55806	-0.55738	-0.37867
	11.8843	-0.56026	-0.55614	-0.37832
	11.8851	-0.56055	-0.55496	-0.37689
	11.886	-0.56095	-0.55429	-0.37584
	11.8868	-0.56117	-0.5547	-0.37652
	11.8877	-0.56159	-0.55565	-0.37745
	11.8885	-0.56172	-0.55705	-0.37747
	11.8893	-0.56144	-0.55812	-0.37797
	11.8902	-0.56182	-0.55803	-0.37837
	11.891	-0.56136	-0.55787	-0.37787
	11.8918	-0.56079	-0.55697	-0.37841
	11.8926	-0.56102	-0.55561	-0.37859
	11.8935	-0.56102	-0.55454	-0.37881
	11.8943	-0.56124	-0.55466	-0.37825
	11.8951	-0.55984	-0.5547	-0.37837
	11.896	-0.56039	-0.55411	-0.37818
	11.8968	-0.5596	-0.55372	-0.37752
	11.8977	-0.55902	-0.55355	-0.37754
	11.8985	-0.55831	-0.55185	-0.37783
	11.8993	-0.55869	-0.55086	-0.37836
	11.9002	-0.55863	-0.55091	-0.37845
	11.901	-0.55738	-0.55035	-0.37864
	11.9018	-0.55711	-0.54982	-0.37896
	11.9026	-0.55716	-0.54946	-0.3788
	11.9035	-0.55727	-0.54919	-0.37843
	11.9043	-0.55671	-0.54838	-0.37864
	11.9052	-0.5557	-0.5487	-0.37817
	11.906	-0.55537	-0.54906	-0.37828
	11.9068	-0.55462	-0.54793	-0.37866
	11.9077	-0.5539	-0.54704	-0.37828
	11.9085	-0.5542	-0.54649	-0.37784
	11.9093	-0.55427	-0.54539	-0.37802
	11.9101	-0.55426	-0.54361	-0.37803
	11.911	-0.55507	-0.5419	-0.37868
	11.9118	-0.55505	-0.54092	-0.37963
	11.9126	-0.55466	-0.53991	-0.38027
	11.9135	-0.55411	-0.53922	-0.38054
	11.9143	-0.55423	-0.53936	-0.38059
	11.9152	-0.55467	-0.53826	-0.38111
	11.916	-0.55571	-0.53677	-0.38104
	11.9168	-0.55587	-0.53644	-0.38136
	11.9177	-0.55553	-0.53604	-0.38154
	11.9185	-0.55581	-0.53589	-0.38031
	11.9193	-0.55595	-0.53648	-0.37879
	11.9201	-0.55653	-0.53633	-0.37754
	11.921	-0.55619	-0.53659	-0.377
	11.9218	-0.5574	-0.53754	-0.37681
	11.9227	-0.55754	-0.53793	-0.37674
	11.9235	-0.55688	-0.53729	-0.37726
	11.9243	-0.55617	-0.53717	-0.37833
	11.9251	-0.5552	-0.53771	-0.37887
	11.926	-0.55536	-0.53759	-0.37915
	11.9268	-0.55578	-0.53704	-0.37901
	11.9276	-0.55703	-0.5372	-0.37874
	11.9285	-0.55781	-0.53729	-0.37846
	11.9293	-0.55784	-0.53701	-0.37855
	11.9301	-0.5589	-0.53718	-0.37892
	11.931	-0.55916	-0.53782	-0.37805
	11.9318	-0.55703	-0.53798	-0.37656
	11.9326	-0.5572	-0.53776	-0.37508
	11.9335	-0.55689	-0.53789	-0.3735
	11.9343	-0.5576	-0.53853	-0.37247
	11.9351	-0.55673	-0.53921	-0.37172
	11.936	-0.55585	-0.5397	-0.37083
	11.9368	-0.55505	-0.54014	-0.36956
	11.9376	-0.55439	-0.53991	-0.36868
	11.9385	-0.55387	-0.53994	-0.36867
	11.9393	-0.55429	-0.53967	-0.37009
	11.9401	-0.55445	-0.53901	-0.37108
	11.941	-0.55405	-0.53879	-0.37201
	11.9418	-0.55406	-0.53859	-0.3727
	11.9426	-0.55328	-0.538	-0.37197
	11.9435	-0.55316	-0.53707	-0.37047
	11.9443	-0.55361	-0.53638	-0.36925
	11.9451	-0.55428	-0.5355	-0.36891
	11.946	-0.55507	-0.53465	-0.3685
	11.9468	-0.55409	-0.53418	-0.36908
	11.9476	-0.55329	-0.53371	-0.37042
	11.9485	-0.55275	-0.53274	-0.37164
	11.9493	-0.55252	-0.53265	-0.3728
	11.9501	-0.55254	-0.53219	-0.37317
	11.951	-0.55157	-0.53122	-0.37328
	11.9518	-0.55096	-0.5311	-0.37399
	11.9526	-0.55239	-0.53083	-0.37394
	11.9535	-0.55254	-0.53022	-0.37425
	11.9543	-0.55344	-0.52995	-0.3747
	11.9551	-0.55341	-0.5298	-0.37487
	11.956	-0.55452	-0.52845	-0.37525
	11.9568	-0.55436	-0.52797	-0.37576
	11.9576	-0.5543	-0.52741	-0.37651
	11.9585	-0.55447	-0.52716	-0.37685
	11.9593	-0.55459	-0.52688	-0.37723
	11.9601	-0.55395	-0.52713	-0.37691
	11.961	-0.55366	-0.52802	-0.37694
	11.9618	-0.55316	-0.52866	-0.37635
	11.9626	-0.55264	-0.52815	-0.3761
	11.9635	-0.55263	-0.52682	-0.37762
	11.9643	-0.55312	-0.52622	-0.37955
	11.9651	-0.55251	-0.52594	-0.38045
	11.966	-0.55105	-0.52477	-0.37977
	11.9668	-0.55073	-0.52394	-0.37938
	11.9676	-0.55175	-0.52303	-0.3789
	11.9685	-0.55248	-0.52252	-0.37858
	11.9693	-0.55261	-0.52281	-0.37858
	11.9701	-0.55225	-0.52271	-0.37819
	11.971	-0.55188	-0.52228	-0.37799
	11.9718	-0.55222	-0.52253	-0.37821
	11.9726	-0.55225	-0.52219	-0.37797
	11.9735	-0.55105	-0.52272	-0.37828
	11.9743	-0.5511	-0.52223	-0.37806
	11.9751	-0.55102	-0.52128	-0.37772
	11.976	-0.55063	-0.52043	-0.37823
	11.9768	-0.55057	-0.52059	-0.37828
	11.9776	-0.55189	-0.52039	-0.37774
	11.9785	-0.55192	-0.51993	-0.37719
	11.9793	-0.55249	-0.51894	-0.3773
	11.9801	-0.55205	-0.51727	-0.37646
	11.981	-0.55096	-0.51588	-0.37552
	11.9818	-0.55046	-0.51492	-0.37541
	11.9826	-0.55038	-0.51369	-0.37573
	11.9835	-0.55118	-0.51266	-0.37605
	11.9843	-0.55101	-0.51242	-0.37583
	11.9851	-0.55099	-0.51107	-0.37596
	11.986	-0.55147	-0.51018	-0.37673
	11.9868	-0.55293	-0.51063	-0.37751
	11.9876	-0.55278	-0.51028	-0.3779
	11.9885	-0.55255	-0.50989	-0.37804
	11.9893	-0.55168	-0.50917	-0.3776
	11.9901	-0.55116	-0.50877	-0.37699
	11.991	-0.55038	-0.50799	-0.37657
	11.9918	-0.54986	-0.50673	-0.37591
	11.9926	-0.54985	-0.5059	-0.37517
	11.9935	-0.54952	-0.50557	-0.37539
	11.9943	-0.5486	-0.50471	-0.37573
	11.9951	-0.54754	-0.50443	-0.37646
	11.996	-0.54777	-0.50434	-0.37677
	11.9968	-0.54678	-0.50393	-0.37611
	11.9976	-0.54548	-0.50237	-0.37592
	11.9985	-0.54478	-0.50084	-0.37587
	11.9993	-0.54487	-0.4996	-0.37593
	12.0001	-0.54393	-0.49902	-0.37564
	12.001	-0.54416	-0.49951	-0.3763
	12.0018	-0.5461	-0.5001	-0.3783
	12.0026	-0.54643	-0.49974	-0.37915
	12.0035	-0.54626	-0.49929	-0.37899
	12.0043	-0.54511	-0.50043	-0.37897
	12.0051	-0.54392	-0.50109	-0.37921
	12.006	-0.54366	-0.50213	-0.37804
	12.0068	-0.54357	-0.50302	-0.37688
	12.0076	-0.54319	-0.50252	-0.37632
	12.0085	-0.54289	-0.50277	-0.37659
	12.0093	-0.54149	-0.50282	-0.37686
	12.0101	-0.54148	-0.50259	-0.37717
	12.011	-0.5416	-0.50239	-0.37727
	12.0118	-0.54264	-0.50165	-0.37811
	12.0126	-0.54384	-0.50155	-0.37992
	12.0135	-0.5441	-0.50111	-0.3814
	12.0143	-0.54393	-0.5007	-0.38214
	12.0151	-0.54532	-0.50073	-0.38225
	12.016	-0.54681	-0.50099	-0.38207
	12.0168	-0.54657	-0.50156	-0.38226
	12.0176	-0.54735	-0.50137	-0.38311
	12.0185	-0.54891	-0.50157	-0.38353
	12.0193	-0.54871	-0.5022	-0.38411
	12.0201	-0.54835	-0.50307	-0.38441
	12.021	-0.54811	-0.50357	-0.3841
	12.0218	-0.54739	-0.50288	-0.3834
	12.0226	-0.54624	-0.50097	-0.3823
	12.0235	-0.54639	-0.49952	-0.38145
	12.0243	-0.54719	-0.4986	-0.381
	12.0251	-0.54869	-0.49683	-0.38026
	12.026	-0.54993	-0.49543	-0.38039
	12.0268	-0.54964	-0.49411	-0.38174
	12.0276	-0.54991	-0.49213	-0.38207
	12.0285	-0.54946	-0.49069	-0.38237
	12.0293	-0.54916	-0.48956	-0.38259
	12.0301	-0.54995	-0.48892	-0.3826
	12.031	-0.54985	-0.48823	-0.38238
	12.0318	-0.54879	-0.488	-0.38246
	12.0326	-0.54724	-0.48811	-0.38212
	12.0335	-0.5474	-0.4881	-0.38144
	12.0343	-0.54789	-0.48813	-0.38071
	12.0351	-0.54948	-0.48728	-0.37964
	12.0359	-0.55016	-0.48606	-0.37922
	12.0368	-0.54964	-0.48593	-0.37927
	12.0376	-0.54943	-0.48545	-0.37895
	12.0384	-0.54912	-0.48511	-0.37835
	12.0393	-0.54844	-0.48539	-0.3781
	12.0401	-0.54783	-0.48567	-0.37813
	12.041	-0.54672	-0.48498	-0.37851
	12.0418	-0.54733	-0.48365	-0.37917
	12.0426	-0.548	-0.48395	-0.38005
	12.0434	-0.54734	-0.48413	-0.37989
	12.0443	-0.54649	-0.48457	-0.37944
	12.0451	-0.54596	-0.48455	-0.37999
	12.0459	-0.54551	-0.48402	-0.38096
	12.0468	-0.54613	-0.4843	-0.38047
	12.0476	-0.54636	-0.4849	-0.37929
	12.0485	-0.54632	-0.4854	-0.37896
	12.0493	-0.54773	-0.48533	-0.37903
	12.0501	-0.54788	-0.48468	-0.37857
	12.051	-0.5473	-0.48435	-0.37779
	12.0518	-0.54769	-0.48457	-0.37773
	12.0526	-0.54837	-0.48322	-0.37785
	12.0534	-0.54861	-0.48296	-0.37786
	12.0543	-0.54755	-0.48303	-0.37742
	12.0551	-0.54643	-0.4817	-0.37712
	12.0559	-0.54524	-0.48134	-0.3772
	12.0568	-0.54427	-0.48133	-0.37734
	12.0576	-0.54368	-0.48043	-0.37727
	12.0585	-0.54373	-0.47984	-0.37739
	12.0593	-0.54323	-0.47903	-0.37757
	12.0601	-0.54303	-0.47752	-0.37812
	12.061	-0.54376	-0.47597	-0.3784
	12.0618	-0.54467	-0.47502	-0.3783
	12.0626	-0.54456	-0.47554	-0.3773
	12.0634	-0.5445	-0.47495	-0.37623
	12.0643	-0.54513	-0.47492	-0.37624
	12.0651	-0.54567	-0.47457	-0.37686
	12.066	-0.54602	-0.47414	-0.3767
	12.0668	-0.54649	-0.47374	-0.37607
	12.0676	-0.54617	-0.47282	-0.37551
	12.0685	-0.54615	-0.47217	-0.37538
	12.0693	-0.54504	-0.47237	-0.37574
	12.0701	-0.54328	-0.47295	-0.37575
	12.0709	-0.54284	-0.47246	-0.37635
	12.0718	-0.54344	-0.47156	-0.37751
	12.0726	-0.54451	-0.47047	-0.37768
	12.0734	-0.54551	-0.47039	-0.37794
	12.0743	-0.5459	-0.47016	-0.37846
	12.0751	-0.54544	-0.46981	-0.3785
	12.0759	-0.54606	-0.4702	-0.37893
	12.0768	-0.54704	-0.46864	-0.37967
	12.0776	-0.54737	-0.46707	-0.37965
	12.0784	-0.54772	-0.46582	-0.37942
	12.0793	-0.5481	-0.46434	-0.37976
	12.0801	-0.54829	-0.46357	-0.38072
	12.0809	-0.54797	-0.46321	-0.38072
	12.0818	-0.54804	-0.46222	-0.37993
	12.0826	-0.54904	-0.46172	-0.38032
	12.0834	-0.5496	-0.46114	-0.38159
	12.0843	-0.54984	-0.46052	-0.38244
	12.0851	-0.55001	-0.45993	-0.38304
	12.0859	-0.5497	-0.45953	-0.38307
	12.0868	-0.54931	-0.45914	-0.38322
	12.0876	-0.549	-0.45833	-0.38359
	12.0884	-0.54883	-0.45748	-0.3838
	12.0893	-0.54906	-0.45627	-0.38338
	12.0901	-0.54994	-0.45482	-0.38237
	12.0909	-0.55034	-0.45395	-0.38244
	12.0918	-0.55087	-0.454	-0.38311
	12.0926	-0.5511	-0.4535	-0.38377
	12.0934	-0.5495	-0.45401	-0.38459
	12.0943	-0.54787	-0.45377	-0.3848
	12.0951	-0.54797	-0.45244	-0.38509
	12.0959	-0.54976	-0.45151	-0.38601
	12.0968	-0.55021	-0.45104	-0.38612
	12.0976	-0.54956	-0.45129	-0.38599
	12.0984	-0.54901	-0.45159	-0.3868
	12.0993	-0.54912	-0.45128	-0.38765
	12.1001	-0.5494	-0.45135	-0.38807
	12.1009	-0.55017	-0.45176	-0.38804
	12.1018	-0.55143	-0.45124	-0.38856
	12.1026	-0.55137	-0.45096	-0.38894
	12.1034	-0.55019	-0.45029	-0.38859
	12.1043	-0.54996	-0.44871	-0.38866
	12.1051	-0.54978	-0.4477	-0.38812
	12.1059	-0.54935	-0.44754	-0.38681
	12.1068	-0.54876	-0.4472	-0.38627
	12.1076	-0.54841	-0.44704	-0.38639
	12.1084	-0.54815	-0.4475	-0.38642
	12.1093	-0.54762	-0.44781	-0.38737
	12.1101	-0.54695	-0.44795	-0.38879
	12.1109	-0.54649	-0.44916	-0.38929
	12.1118	-0.54643	-0.44934	-0.38829
	12.1126	-0.54604	-0.44925	-0.38644
	12.1134	-0.54528	-0.45033	-0.38582
	12.1143	-0.54632	-0.44979	-0.38649
	12.1151	-0.54766	-0.44899	-0.3867
	12.1159	-0.54762	-0.44801	-0.3862
	12.1168	-0.54653	-0.44656	-0.38564
	12.1176	-0.54563	-0.44526	-0.38495
	12.1184	-0.54518	-0.44448	-0.38404
	12.1193	-0.54558	-0.44387	-0.38381
	12.1201	-0.54492	-0.44447	-0.38335
	12.1209	-0.54359	-0.44492	-0.38197
	12.1218	-0.54275	-0.44416	-0.38083
	12.1226	-0.542	-0.44461	-0.37993
	12.1234	-0.54125	-0.4456	-0.38066
	12.1243	-0.54095	-0.44555	-0.38111
	12.1251	-0.54115	-0.44558	-0.38036
	12.1259	-0.54132	-0.44569	-0.38046
	12.1268	-0.5416	-0.44492	-0.38175
	12.1276	-0.54296	-0.44385	-0.38247
	12.1284	-0.54376	-0.44273	-0.38194
	12.1293	-0.54363	-0.44179	-0.38164
	12.1301	-0.54422	-0.44133	-0.38172
	12.1309	-0.54482	-0.44149	-0.38093
	12.1318	-0.5447	-0.44039	-0.38053
	12.1326	-0.54455	-0.44026	-0.38204
	12.1334	-0.54498	-0.43943	-0.38332
	12.1343	-0.54565	-0.43779	-0.38319
	12.1351	-0.54492	-0.43732	-0.38268
	12.1359	-0.54338	-0.43676	-0.38266
	12.1368	-0.54325	-0.43669	-0.3825
	12.1376	-0.54408	-0.4373	-0.3818
	12.1384	-0.54492	-0.4372	-0.38185
	12.1393	-0.54503	-0.43764	-0.3827
	12.1401	-0.54467	-0.43697	-0.38291
	12.1409	-0.5453	-0.43583	-0.38271
	12.1418	-0.54634	-0.43508	-0.38325
	12.1426	-0.54737	-0.43372	-0.38348
	12.1434	-0.54774	-0.43191	-0.38304
	12.1443	-0.54854	-0.43057	-0.38252
	12.1451	-0.5495	-0.43083	-0.38192
	12.1459	-0.54857	-0.43093	-0.38219
	12.1468	-0.54784	-0.43058	-0.38327
	12.1476	-0.54688	-0.43051	-0.38321
	12.1484	-0.54589	-0.43026	-0.38302
	12.1493	-0.54564	-0.42926	-0.3837
	12.1501	-0.54534	-0.42876	-0.38432
	12.1509	-0.54541	-0.42848	-0.38412
	12.1518	-0.54523	-0.42645	-0.38451
	12.1526	-0.54538	-0.424	-0.3852
	12.1534	-0.54652	-0.42161	-0.3845
	12.1543	-0.54684	-0.42039	-0.38414
	12.1551	-0.54697	-0.42016	-0.38453
	12.1559	-0.54793	-0.41906	-0.38381
	12.1568	-0.54972	-0.41768	-0.38352
	12.1576	-0.55069	-0.41725	-0.38434
	12.1584	-0.5501	-0.41657	-0.38522
	12.1593	-0.54944	-0.41531	-0.38586
	12.1601	-0.5495	-0.4146	-0.38606
	12.1609	-0.54994	-0.41374	-0.38574
	12.1618	-0.55014	-0.41293	-0.38527
	12.1626	-0.54946	-0.41167	-0.38453
	12.1634	-0.54919	-0.41211	-0.38473
	12.1643	-0.54924	-0.41312	-0.38629
	12.1651	-0.54939	-0.4124	-0.38739
	12.1659	-0.54927	-0.41036	-0.38825
	12.1668	-0.54974	-0.40852	-0.38848
	12.1676	-0.54978	-0.40654	-0.38743
	12.1684	-0.54977	-0.40489	-0.387
	12.1693	-0.54968	-0.40386	-0.38673
	12.1701	-0.54978	-0.40354	-0.38623
	12.1709	-0.55073	-0.40238	-0.38611
	12.1718	-0.55066	-0.40102	-0.38573
	12.1726	-0.55047	-0.40129	-0.38564
	12.1734	-0.55071	-0.40074	-0.38571
	12.1743	-0.54991	-0.40047	-0.38611
	12.1751	-0.54888	-0.40018	-0.38584
	12.1759	-0.54723	-0.3991	-0.38473
	12.1768	-0.54614	-0.39898	-0.38503
	12.1776	-0.54572	-0.39906	-0.3857
	12.1784	-0.54514	-0.39849	-0.38566
	12.1792	-0.54514	-0.39816	-0.38533
	12.1801	-0.5454	-0.3979	-0.38489
	12.1809	-0.54597	-0.39646	-0.38502
	12.1817	-0.54605	-0.39616	-0.38509
	12.1826	-0.54599	-0.39476	-0.38515
	12.1834	-0.54613	-0.39407	-0.38594
	12.1843	-0.54547	-0.39385	-0.38634
	12.1851	-0.54525	-0.39294	-0.38596
	12.1859	-0.54493	-0.39238	-0.38536
	12.1867	-0.54524	-0.39225	-0.38495
	12.1876	-0.54586	-0.39254	-0.38495
	12.1884	-0.54589	-0.39275	-0.38519
	12.1892	-0.54605	-0.39185	-0.38557
	12.1901	-0.54689	-0.39066	-0.3869
	12.1909	-0.54762	-0.3902	-0.38788
	12.1918	-0.54721	-0.38998	-0.38761
	12.1926	-0.54697	-0.38903	-0.38839
	12.1934	-0.54749	-0.38773	-0.38929
	12.1943	-0.54733	-0.38752	-0.39004
	12.1951	-0.54687	-0.38749	-0.39011
	12.1959	-0.54686	-0.38701	-0.39031
	12.1967	-0.54823	-0.38646	-0.39172
	12.1976	-0.5489	-0.38522	-0.39237
	12.1984	-0.54807	-0.38475	-0.39179
	12.1992	-0.54771	-0.38408	-0.39148
	12.2001	-0.5475	-0.38312	-0.39202
	12.2009	-0.54673	-0.3827	-0.39274
	12.2018	-0.54575	-0.38268	-0.39265
	12.2026	-0.54556	-0.38247	-0.39276
	12.2034	-0.5443	-0.38305	-0.39329
	12.2043	-0.54441	-0.38312	-0.39348
	12.2051	-0.545	-0.38227	-0.39347
	12.2059	-0.54495	-0.38147	-0.39265
	12.2067	-0.54555	-0.38078	-0.39264
	12.2076	-0.54523	-0.37961	-0.39357
	12.2084	-0.54492	-0.37828	-0.39343
	12.2093	-0.54523	-0.37708	-0.39347
	12.2101	-0.5455	-0.37626	-0.39376
	12.2109	-0.54488	-0.37575	-0.39321
	12.2118	-0.54428	-0.37494	-0.39259
	12.2126	-0.54391	-0.37411	-0.39206
	12.2134	-0.54367	-0.37363	-0.39093
	12.2142	-0.54311	-0.37317	-0.38992
	12.2151	-0.54307	-0.37355	-0.3884
	12.2159	-0.54379	-0.37328	-0.38746
	12.2167	-0.54393	-0.37256	-0.38765
	12.2176	-0.54342	-0.37207	-0.38716
	12.2184	-0.54265	-0.3711	-0.38604
	12.2192	-0.54224	-0.36963	-0.38593
	12.2201	-0.54167	-0.36858	-0.38639
	12.2209	-0.54142	-0.36751	-0.3868
	12.2217	-0.54194	-0.3671	-0.38666
	12.2226	-0.54232	-0.36638	-0.38663
	12.2234	-0.54183	-0.36512	-0.38671
	12.2242	-0.54308	-0.36404	-0.38644
	12.2251	-0.54389	-0.36276	-0.38661
	12.2259	-0.5443	-0.36178	-0.38667
	12.2267	-0.5443	-0.36056	-0.38704
	12.2276	-0.54375	-0.35956	-0.38654
	12.2284	-0.54354	-0.35936	-0.38559
	12.2292	-0.54279	-0.35891	-0.38633
	12.2301	-0.54312	-0.35901	-0.38748
	12.2309	-0.5446	-0.35939	-0.38829
	12.2317	-0.54592	-0.35892	-0.38843
	12.2326	-0.5462	-0.35867	-0.3889
	12.2334	-0.54582	-0.35871	-0.38972
	12.2342	-0.54556	-0.35882	-0.3901
	12.2351	-0.54518	-0.35856	-0.39051
	12.2359	-0.54411	-0.35758	-0.39147
	12.2367	-0.54309	-0.35649	-0.39214
	12.2376	-0.54335	-0.35591	-0.39241
	12.2384	-0.54398	-0.35567	-0.39221
	12.2392	-0.54467	-0.35671	-0.39222
	12.2401	-0.54544	-0.3582	-0.39233
	12.2409	-0.54603	-0.35855	-0.39147
	12.2417	-0.54632	-0.35838	-0.39019
	12.2426	-0.54599	-0.35735	-0.39007
	12.2434	-0.54522	-0.35632	-0.39063
	12.2442	-0.54531	-0.35572	-0.39097
	12.2451	-0.54465	-0.35539	-0.39141
	12.2459	-0.54297	-0.35537	-0.39165
	12.2467	-0.54285	-0.35455	-0.39237
	12.2476	-0.54325	-0.35333	-0.39294
	12.2484	-0.54307	-0.3529	-0.39301
	12.2492	-0.54352	-0.35272	-0.39302
	12.2501	-0.54418	-0.35203	-0.39237
	12.2509	-0.54385	-0.35086	-0.39172
	12.2517	-0.54325	-0.35025	-0.39131
	12.2526	-0.54306	-0.34973	-0.39131
	12.2534	-0.54314	-0.34835	-0.39154
	12.2542	-0.54385	-0.34739	-0.39197
	12.2551	-0.5436	-0.34633	-0.39268
	12.2559	-0.54328	-0.34527	-0.39261
	12.2567	-0.54453	-0.34455	-0.3925
	12.2576	-0.54531	-0.34369	-0.3924
	12.2584	-0.54478	-0.34338	-0.392
	12.2592	-0.54347	-0.34217	-0.39246
	12.2601	-0.54247	-0.3399	-0.39311
	12.2609	-0.54234	-0.33804	-0.39274
	12.2617	-0.54274	-0.33728	-0.39216
	12.2626	-0.54315	-0.33663	-0.39223
	12.2634	-0.54303	-0.33593	-0.39251
	12.2642	-0.54311	-0.33564	-0.39189
	12.2651	-0.54291	-0.33638	-0.39088
	12.2659	-0.54294	-0.33623	-0.39049
	12.2667	-0.54384	-0.33516	-0.39056
	12.2676	-0.54376	-0.33423	-0.39005
	12.2684	-0.54343	-0.33335	-0.38902
	12.2692	-0.5432	-0.33234	-0.38925
	12.2701	-0.54271	-0.33132	-0.39035
	12.2709	-0.54292	-0.33068	-0.39128
	12.2717	-0.54329	-0.3301	-0.39225
	12.2726	-0.54268	-0.32878	-0.39263
	12.2734	-0.54214	-0.32819	-0.39168
	12.2742	-0.54173	-0.32829	-0.39065
	12.2751	-0.54111	-0.32768	-0.39008
	12.2759	-0.54175	-0.32633	-0.38941
	12.2767	-0.54254	-0.32479	-0.38912
	12.2776	-0.54225	-0.324	-0.38898
	12.2784	-0.54184	-0.3233	-0.38892
	12.2792	-0.54163	-0.32155	-0.38903
	12.2801	-0.54235	-0.32034	-0.38867
	12.2809	-0.54307	-0.31971	-0.38802
	12.2817	-0.54295	-0.31969	-0.38831
	12.2826	-0.5428	-0.31862	-0.38919
	12.2834	-0.54295	-0.31709	-0.38932
	12.2842	-0.54284	-0.3155	-0.3889
	12.2851	-0.54238	-0.31369	-0.38927
	12.2859	-0.54167	-0.31169	-0.38971
	12.2867	-0.54168	-0.30983	-0.38979
	12.2876	-0.5417	-0.30835	-0.39016
	12.2884	-0.54139	-0.30756	-0.39002
	12.2892	-0.54114	-0.30731	-0.39071
	12.2901	-0.54155	-0.3071	-0.39068
	12.2909	-0.54168	-0.30605	-0.3898
	12.2917	-0.54097	-0.30458	-0.38869
	12.2926	-0.54008	-0.30409	-0.38759
	12.2934	-0.54004	-0.30344	-0.38711
	12.2942	-0.53986	-0.30255	-0.38732
	12.2951	-0.5399	-0.30162	-0.38765
	12.2959	-0.54063	-0.30032	-0.38853
	12.2967	-0.54061	-0.29968	-0.38906
	12.2976	-0.54057	-0.29977	-0.38878
	12.2984	-0.54078	-0.29935	-0.38892
	12.2992	-0.54118	-0.29866	-0.38906
	12.3001	-0.5418	-0.2986	-0.38848
	12.3009	-0.54215	-0.29862	-0.38827
	12.3017	-0.54192	-0.29839	-0.38862
	12.3026	-0.5418	-0.29648	-0.38878
	12.3034	-0.54153	-0.29516	-0.38882
	12.3042	-0.54071	-0.29432	-0.3893
	12.3051	-0.54036	-0.29456	-0.38961
	12.3059	-0.54073	-0.29475	-0.38906
	12.3067	-0.54187	-0.29308	-0.38904
	12.3076	-0.54204	-0.29144	-0.38876
	12.3084	-0.54117	-0.29002	-0.38785
	12.3092	-0.54021	-0.28899	-0.38753
	12.3101	-0.53989	-0.28814	-0.38809
	12.3109	-0.53916	-0.2875	-0.38878
	12.3117	-0.53813	-0.28714	-0.38884
	12.3126	-0.53777	-0.28742	-0.38956
	12.3134	-0.53791	-0.28633	-0.38952
	12.3142	-0.53839	-0.2854	-0.38982
	12.3151	-0.53827	-0.28414	-0.3907
	12.3159	-0.53786	-0.28217	-0.39117
	12.3167	-0.5381	-0.28106	-0.39085
	12.3176	-0.53794	-0.28084	-0.39105
	12.3184	-0.53761	-0.27983	-0.39165
	12.3192	-0.53763	-0.27861	-0.39186
	12.3201	-0.5376	-0.27766	-0.39202
	12.3209	-0.53814	-0.27632	-0.39179
	12.3217	-0.53849	-0.27488	-0.3913
	12.3226	-0.53902	-0.27429	-0.39066
	12.3234	-0.53899	-0.2744	-0.38989
	12.3242	-0.53938	-0.27343	-0.38921
	12.325	-0.54044	-0.27237	-0.3885
	12.3259	-0.5415	-0.2706	-0.3882
	12.3267	-0.54189	-0.26852	-0.38867
	12.3276	-0.5412	-0.26763	-0.38886
	12.3284	-0.54088	-0.2676	-0.38926
	12.3292	-0.54072	-0.26765	-0.38954
	12.33	-0.54113	-0.26702	-0.38976
	12.3309	-0.54111	-0.26568	-0.38923
	12.3317	-0.54125	-0.26434	-0.38894
	12.3325	-0.54209	-0.26276	-0.38944
	12.3334	-0.54195	-0.26097	-0.38928
	12.3342	-0.54146	-0.25971	-0.38923
	12.3351	-0.54109	-0.25792	-0.38885
	12.3359	-0.54077	-0.25672	-0.38848
	12.3367	-0.54071	-0.25658	-0.38899
	12.3376	-0.54009	-0.25589	-0.38927
	12.3384	-0.54067	-0.25395	-0.38907
	12.3392	-0.5408	-0.25266	-0.38882
	12.34	-0.53964	-0.25192	-0.38816
	12.3409	-0.53939	-0.25103	-0.38757
	12.3417	-0.53978	-0.24968	-0.38857
	12.3425	-0.5393	-0.24785	-0.38967
	12.3434	-0.53837	-0.24547	-0.39092
	12.3442	-0.53871	-0.24392	-0.39249
	12.3451	-0.53888	-0.24321	-0.39307
	12.3459	-0.5379	-0.24271	-0.3937
	12.3467	-0.53716	-0.24303	-0.3942
	12.3476	-0.53751	-0.24297	-0.39415
	12.3484	-0.53845	-0.24226	-0.39432
	12.3492	-0.5386	-0.24128	-0.39483
	12.35	-0.5386	-0.24047	-0.39527
	12.3509	-0.53881	-0.24009	-0.39528
	12.3517	-0.53829	-0.24015	-0.3955
	12.3526	-0.53773	-0.23914	-0.39545
	12.3534	-0.53787	-0.23825	-0.39514
	12.3542	-0.53839	-0.23766	-0.39546
	12.3551	-0.53895	-0.23742	-0.3963
	12.3559	-0.5397	-0.23795	-0.39577
	12.3567	-0.54083	-0.23821	-0.39551
	12.3575	-0.54155	-0.23738	-0.39515
	12.3584	-0.54183	-0.23618	-0.39488
	12.3592	-0.54183	-0.23521	-0.39451
	12.36	-0.54191	-0.23399	-0.39515
	12.3609	-0.54224	-0.23253	-0.39602
	12.3617	-0.54128	-0.23118	-0.3967
	12.3626	-0.54013	-0.2304	-0.39673
	12.3634	-0.54034	-0.23071	-0.39645
	12.3642	-0.54102	-0.23009	-0.39581
	12.3651	-0.54072	-0.22893	-0.39538
	12.3659	-0.53999	-0.22759	-0.39562
	12.3667	-0.53987	-0.22588	-0.39585
	12.3675	-0.54004	-0.2244	-0.39569
	12.3684	-0.5401	-0.22422	-0.39582
	12.3692	-0.5396	-0.22411	-0.39543
	12.37	-0.5393	-0.22229	-0.39488
	12.3709	-0.54063	-0.22111	-0.39553
	12.3717	-0.54188	-0.22023	-0.39688
	12.3725	-0.54348	-0.21834	-0.39656
	12.3734	-0.54512	-0.21615	-0.39649
	12.3742	-0.54508	-0.21452	-0.39682
	12.375	-0.54476	-0.21339	-0.39715
	12.3759	-0.54443	-0.21172	-0.39726
	12.3767	-0.54395	-0.20985	-0.39757
	12.3775	-0.54312	-0.20792	-0.39748
	12.3784	-0.54234	-0.20635	-0.39722
	12.3792	-0.54132	-0.20504	-0.3968
	12.38	-0.54058	-0.20368	-0.39689
	12.3809	-0.54059	-0.2028	-0.39692
	12.3817	-0.5418	-0.20156	-0.39693
	12.3825	-0.5426	-0.20035	-0.39671
	12.3834	-0.54221	-0.19977	-0.39601
	12.3842	-0.54156	-0.19821	-0.39584
	12.385	-0.54153	-0.19758	-0.39626
	12.3859	-0.54143	-0.19685	-0.39617
	12.3867	-0.54103	-0.19629	-0.39603
	12.3875	-0.54146	-0.19667	-0.3959
	12.3884	-0.54179	-0.19627	-0.39592
	12.3892	-0.54145	-0.19483	-0.39589
	12.39	-0.54137	-0.1932	-0.39648
	12.3909	-0.54167	-0.19246	-0.39646
	12.3917	-0.54119	-0.19132	-0.39485
	12.3925	-0.54021	-0.18944	-0.39373
	12.3934	-0.53926	-0.18892	-0.39404
	12.3942	-0.53895	-0.18948	-0.39391
	12.395	-0.53957	-0.18965	-0.39356
	12.3959	-0.54015	-0.18921	-0.39277
	12.3967	-0.54077	-0.18867	-0.39178
	12.3975	-0.54033	-0.18857	-0.39223
	12.3984	-0.53992	-0.18851	-0.39301
	12.3992	-0.54065	-0.18832	-0.39337
	12.4	-0.5414	-0.18838	-0.39441
	12.4009	-0.54109	-0.18871	-0.39497
	12.4017	-0.54069	-0.18802	-0.3947
	12.4025	-0.5408	-0.18777	-0.39441
	12.4034	-0.5413	-0.18738	-0.39488
	12.4042	-0.54246	-0.18581	-0.39638
	12.405	-0.54309	-0.1845	-0.39694
	12.4059	-0.54249	-0.1828	-0.39684
	12.4067	-0.54286	-0.18172	-0.39717
	12.4075	-0.54328	-0.1806	-0.39741
	12.4084	-0.54243	-0.17954	-0.39734
	12.4092	-0.54196	-0.17801	-0.39713
	12.41	-0.54189	-0.1768	-0.39652
	12.4109	-0.54236	-0.17603	-0.39581
	12.4117	-0.54249	-0.17524	-0.39571
	12.4125	-0.54247	-0.17446	-0.39561
	12.4134	-0.54246	-0.174	-0.39551
	12.4142	-0.54155	-0.17278	-0.39541
	12.415	-0.54014	-0.17097	-0.38348
	12.4159	-0.53892	-0.16878	-0.38304
	12.4167	-0.53837	-0.16683	-0.38252
	12.4175	-0.5385	-0.16442	-0.38192
	12.4184	-0.53928	-0.16137	-0.38219
	12.4192	-0.53924	-0.15896	-0.38327
	12.42	-0.53842	-0.15693	-0.38321
	12.4209	-0.5383	-0.15507	-0.38302
	12.4217	-0.53858	-0.15334	-0.3837
	12.4225	-0.53956	-0.15228	-0.38432
	12.4234	-0.54008	-0.15064	-0.38412
	12.4242	-0.54041	-0.14933	-0.38451
	12.425	-0.5409	-0.1483	-0.3852
	12.4259	-0.54157	-0.14735	-0.3845
	12.4267	-0.54218	-0.14673	-0.38414
	12.4275	-0.54145	-0.14549	-0.38453
	12.4284	-0.54104	-0.14397	-0.38381
	12.4292	-0.54187	-0.14168	-0.38352
	12.43	-0.54245	-0.14071	-0.38434
	12.4309	-0.543	-0.14029	-0.38522
	12.4317	-0.54357	-0.1393	-0.38586
	12.4325	-0.54359	-0.1383	-0.38606
	12.4334	-0.54272	-0.13689	-0.38574
	12.4342	-0.54212	-0.13506	-0.38527
	12.435	-0.54299	-0.13387	-0.38453
	12.4359	-0.54454	-0.13308	-0.38473
	12.4367	-0.54603	-0.13303	-0.38629
	12.4375	-0.54659	-0.13276	-0.38739
	12.4384	-0.54637	-0.13277	-0.38825
	12.4392	-0.54624	-0.13245	-0.38848
	12.44	-0.54668	-0.13083	-0.38743
	12.4409	-0.54688	-0.12984	-0.387
	12.4417	-0.54733	-0.12836	-0.38673
	12.4425	-0.54759	-0.12637	-0.38623
	12.4434	-0.54563	-0.12533	-0.38611
	12.4442	-0.54386	-0.12407	-0.38573
	12.445	-0.54304	-0.1222	-0.38564
	12.4459	-0.54252	-0.121	-0.38571
	12.4467	-0.54161	-0.1202	-0.38611
	12.4475	-0.54086	-0.11889	-0.38584
	12.4484	-0.54158	-0.11753	-0.38473
	12.4492	-0.54254	-0.11707	-0.38503
	12.45	-0.54289	-0.11703	-0.3857
	12.4509	-0.54318	-0.11546	-0.38566
	12.4517	-0.54352	-0.11284	-0.38533
	12.4525	-0.54305	-0.11098	-0.38489
	12.4534	-0.54277	-0.10946	-0.38502
	12.4542	-0.54382	-0.10719	-0.38509
	12.455	-0.54464	-0.10537	-0.38515
	12.4559	-0.54433	-0.1045	-0.38594
	12.4567	-0.54386	-0.10356	-0.38634
	12.4575	-0.54361	-0.10185	-0.38596
	12.4584	-0.54368	-0.09897	-0.38536
	12.4592	-0.54378	-0.09727	-0.38495
	12.46	-0.5435	-0.09617	-0.38495
	12.4609	-0.54392	-0.09541	-0.38519
	12.4617	-0.54438	-0.09356	-0.38557
	12.4625	-0.54404	-0.09237	-0.3869
	12.4634	-0.54456	-0.09138	-0.38788
	12.4642	-0.54551	-0.08953	-0.38761
	12.465	-0.54507	-0.08749	-0.38839
	12.4659	-0.54479	-0.08571	-0.38929
	12.4667	-0.54438	-0.08387	-0.39004
	12.4675	-0.54416	-0.08147	-0.39011
	12.4683	-0.54469	-0.07982	-0.39031
	12.4692	-0.54591	-0.07814	-0.39172
	12.47	-0.54637	-0.07579	-0.39237
	12.4709	-0.54561	-0.07319	-0.39179
	12.4717	-0.545	-0.07124	-0.39148
	12.4725	-0.54401	-0.07012	-0.39202
	12.4733	-0.5425	-0.06904	-0.39274
	12.4742	-0.5415	-0.06776	-0.39265
	12.475	-0.5411	-0.06723	-0.39276
	12.4758	-0.54052	-0.06648	-0.39329
	12.4767	-0.54032	-0.06474	-0.39348
	12.4775	-0.54053	-0.06248	-0.39347
	12.4784	-0.5404	-0.06082	-0.39265
	12.4792	-0.54055	-0.06039	-0.39264
	12.48	-0.54128	-0.05915	-0.39357
	12.4809	-0.54157	-0.05736	-0.39343
	12.4817	-0.54174	-0.05598	-0.39347
	12.4825	-0.54223	-0.05495	-0.39376
	12.4833	-0.54159	-0.05311	-0.39321
	12.4842	-0.54036	-0.05166	-0.39259
	12.485	-0.54132	-0.05025	-0.39206
	12.4858	-0.54231	-0.04899	-0.39093
	12.4867	-0.54142	-0.04841	-0.38992
	12.4875	-0.54114	-0.04687	-0.3884
	12.4884	-0.54164	-0.04495	-0.38746
	12.4892	-0.54152	-0.04325	-0.38765
	12.49	-0.54035	-0.04212	-0.38716
	12.4909	-0.5392	-0.04083	-0.38604
	12.4917	-0.53901	-0.0386	-0.38593
	12.4925	-0.5385	-0.03671	-0.38639
	12.4933	-0.5383	-0.03492	-0.3868
	12.4942	-0.5389	-0.03277	-0.38666
	12.495	-0.53976	-0.03046	-0.38663
	12.4959	-0.53981	-0.02828	-0.38671
	12.4967	-0.54026	-0.02628	-0.38644
	12.4975	-0.54109	-0.02492	-0.38661
	12.4984	-0.54071	-0.02416	-0.38667
	12.4992	-0.54006	-0.02141	-0.38704
	12.5	-0.53952	-0.01902	-0.38654
	12.5008	-0.53836	-0.01767	-0.38559
	12.5017	-0.53768	-0.01619	-0.38633
	12.5025	-0.53645	-0.0131	-0.38748
	12.5033	-0.5349	-0.01121	-0.38829
	12.5042	-0.5353	-0.00931	-0.38843
	12.505	-0.53647	-0.00711	-0.3889
	12.5059	-0.53607	-0.00533	-0.38972
	12.5067	-0.5356	-0.00343	-0.3901
	12.5075	-0.53641	-0.00146	-0.39051
	12.5084	-0.53659	-5.4e-05	-0.39147
	12.5092	-0.53632	0.000583	-0.39214
	12.51	-0.53666	0.001309	-0.39241
	12.5108	-0.53677	0.003315	-0.39221
	12.5117	-0.53665	0.005254	-0.39222
	12.5125	-0.53716	0.005988	-0.39233
	12.5133	-0.53722	0.007408	-0.39147
	12.5142	-0.53635	0.009384	-0.39019
	12.515	-0.53665	0.010866	-0.39007
	12.5158	-0.53688	0.012141	-0.39063
	12.5167	-0.53678	0.013853	-0.39097
	12.5175	-0.53769	0.016208	-0.39141
	12.5183	-0.53772	0.019783	-0.39165
	12.5192	-0.53798	0.022554	-0.39237
	12.52	-0.5377	0.024118	-0.39294
	12.5208	-0.53763	0.02698	-0.39301
	12.5217	-0.53849	0.030133	-0.39302
	12.5225	-0.53863	0.032615	-0.39237
	12.5233	-0.53814	0.033517	-0.39172
	12.5242	-0.53827	0.035428	-0.39131
	12.525	-0.53821	0.036482	-0.39131
	12.5258	-0.53761	0.037835	-0.39154
	12.5267	-0.53775	0.040343	-0.39197
	12.5275	-0.5387	0.042408	-0.39268
	12.5283	-0.53912	0.044689	-0.39261
	12.5292	-0.53939	0.046485	-0.3925
	12.53	-0.53975	0.047553	-0.3924
	12.5308	-0.54011	0.050088	-0.392
	12.5317	-0.53982	0.051934	-0.39246
	12.5325	-0.53893	0.0535	-0.39311
	12.5333	-0.53876	0.056076	-0.39274
	12.5342	-0.53945	0.057996	-0.39216
	12.535	-0.54061	0.059581	-0.39223
	12.5358	-0.54146	0.06176	-0.39251
	12.5367	-0.54119	0.063711	-0.39189
	12.5375	-0.54012	0.065377	-0.39088
	12.5383	-0.5379	0.066979	-0.39049
	12.5392	-0.53686	0.067509	-0.39056
	12.54	-0.53655	0.069113	-0.39005
	12.5408	-0.53728	0.070134	-0.38902
	12.5417	-0.537	0.070219	-0.38925
	12.5425	-0.53616	0.070839	-0.39035
	12.5433	-0.53637	0.071247	-0.39128
	12.5442	-0.53724	0.071804	-0.39225
	12.545	-0.53807	0.073214	-0.39263
	12.5458	-0.53803	0.075033	-0.39168
	12.5467	-0.53772	0.076564	-0.39065
	12.5475	-0.53713	0.078132	-0.39008
	12.5483	-0.53655	0.079434	-0.38941
	12.5492	-0.5365	0.080865	-0.38912
	12.55	-0.53645	0.082806	-0.38898
	12.5508	-0.53538	0.085433	-0.38892
	12.5517	-0.53376	0.087951	-0.38903
	12.5525	-0.53399	0.090697	-0.38867
	12.5533	-0.53583	0.092075	-0.38802
	12.5542	-0.53573	0.092925	-0.38831
	12.555	-0.53499	0.095592	-0.38919
	12.5558	-0.53494	0.098743	-0.38932
	12.5567	-0.53453	0.100323	-0.3889
	12.5575	-0.53465	0.102199	-0.38927
	12.5583	-0.53499	0.104241	-0.38971
	12.5592	-0.53577	0.106421	-0.38979
	12.56	-0.53599	0.108277	-0.39016
	12.5608	-0.53508	0.109862	-0.39002
	12.5617	-0.53439	0.112144	-0.39071
	12.5625	-0.5344	0.114465	-0.39068
	12.5633	-0.53357	0.116711	-0.3898
	12.5642	-0.53319	0.120358	-0.38869
	12.565	-0.5331	0.123456	-0.38759
	12.5658	-0.53249	0.125232	-0.38711
	12.5667	-0.5326	0.128423	-0.38732
	12.5675	-0.53226	0.131493	-0.38765
	12.5683	-0.53141	0.133249	-0.38853
	12.5692	-0.5313	0.134278	-0.38906
	12.57	-0.531	0.13674	-0.38878
	12.5708	-0.53059	0.138966	-0.38892
	12.5717	-0.53062	0.140144	-0.38906
	12.5725	-0.53082	0.140675	-0.38848
	12.5733	-0.53024	0.142316	-0.38827
	12.5742	-0.52989	0.144588	-0.38862
	12.575	-0.52997	0.147709	-0.38878
	12.5758	-0.52987	0.149577	-0.38882
	12.5767	-0.52919	0.150177	-0.3893
	12.5775	-0.52867	0.1526	-0.38961
	12.5783	-0.52878	0.15564	-0.38906
	12.5792	-0.52904	0.158697	-0.38904
	12.58	-0.52945	0.160627	-0.38876
	12.5808	-0.53042	0.163453	-0.38785
	12.5817	-0.53171	0.166134	-0.38753
	12.5825	-0.53199	0.168148	-0.38809
	12.5833	-0.53224	0.171138	-0.38878
	12.5842	-0.53289	0.173377	-0.38884
	12.585	-0.53293	0.174281	-0.38956
	12.5858	-0.53325	0.17604	-0.38952
	12.5867	-0.53379	0.178812	-0.38982
	12.5875	-0.53375	0.180883	-0.3907
	12.5883	-0.53522	0.183284	-0.39117
	12.5892	-0.53657	0.185036	-0.39085
	12.59	-0.53621	0.18779	-0.39105
	12.5908	-0.53633	0.189553	-0.39165
	12.5917	-0.53604	0.192139	-0.39186
	12.5925	-0.53562	0.195449	-0.39202
	12.5933	-0.53622	0.198512	-0.39179
	12.5942	-0.53688	0.200705	-0.3913
	12.595	-0.53682	0.203696	-0.39066
	12.5958	-0.53686	0.205565	-0.38989
	12.5967	-0.53702	0.207005	-0.38921
	12.5975	-0.53795	0.210863	-0.3885
	12.5983	-0.53828	0.213778	-0.3882
	12.5992	-0.53787	0.215572	-0.38867
	12.6	-0.53748	0.217072	-0.38886
	12.6008	-0.53678	0.2192	-0.38926
	12.6017	-0.53574	0.22117	-0.38954
	12.6025	-0.53473	0.223792	-0.38976
	12.6033	-0.53429	0.226656	-0.38923
	12.6042	-0.53375	0.228564	-0.38894
	12.605	-0.5336	0.231315	-0.38944
	12.6058	-0.53392	0.235436	-0.38928
	12.6067	-0.53387	0.239584	-0.38923
	12.6075	-0.53366	0.241657	-0.38885
	12.6083	-0.53398	0.242743	-0.38848
	12.6092	-0.53321	0.244309	-0.38899
	12.61	-0.53219	0.247795	-0.38927
	12.6108	-0.53218	0.251543	-0.38907
	12.6117	-0.53193	0.254442	-0.38882
	12.6125	-0.53186	0.256719	-0.38816
	12.6133	-0.53214	0.259285	-0.38757
	12.6142	-0.53164	0.262248	-0.38857
	12.615	-0.53133	0.264885	-0.38967
	12.6158	-0.53101	0.267235	-0.39092
	12.6166	-0.53044	0.269914	-0.39249
	12.6175	-0.53052	0.273059	-0.39307
	12.6183	-0.53068	0.275437	-0.3937
	12.6191	-0.53058	0.277927	-0.3942
	12.62	-0.53068	0.280925	-0.39415
	12.6208	-0.5314	0.283702	-0.39432
	12.6217	-0.53158	0.287476	-0.39483
	12.6225	-0.53143	0.291099	-0.39527
	12.6233	-0.53208	0.293698	-0.39528
	12.6242	-0.53208	0.296079	-0.3955
	12.625	-0.53201	0.299006	-0.39545
	12.6258	-0.53206	0.300908	-0.39514
	12.6266	-0.53159	0.301908	-0.39546
	12.6275	-0.53093	0.303516	-0.3963
	12.6283	-0.53061	0.306244	-0.39577
	12.6291	-0.53062	0.309106	-0.39551
	12.63	-0.53114	0.311435	-0.39515
	12.6308	-0.53127	0.314494	-0.39488
	12.6317	-0.53089	0.316064	-0.39451
	12.6325	-0.53026	0.318286	-0.39515
	12.6333	-0.52979	0.321791	-0.39602
	12.6341	-0.52947	0.32581	-0.3967
	12.635	-0.52969	0.328304	-0.39673
	12.6358	-0.52985	0.330428	-0.39645
	12.6366	-0.52936	0.333144	-0.39581
	12.6375	-0.52939	0.335791	-0.39538
	12.6383	-0.5297	0.338412	-0.39562
	12.6392	-0.52963	0.340491	-0.39585
	12.64	-0.52952	0.343193	-0.39569
	12.6408	-0.52941	0.345175	-0.39582
	12.6417	-0.52925	0.34761	-0.39543
	12.6425	-0.52951	0.349132	-0.39488
	12.6433	-0.52949	0.350239	-0.39553
	12.6441	-0.52926	0.352348	-0.39688
	12.645	-0.53011	0.354736	-0.39656
	12.6458	-0.53073	0.35659	-0.39649
	12.6466	-0.53068	0.360161	-0.39682
	12.6475	-0.53102	0.363299	-0.39715
	12.6483	-0.53171	0.365556	-0.39726
	12.6492	-0.53201	0.369201	-0.39757
	12.65	-0.53203	0.373167	-0.39748
	12.6508	-0.53154	0.376892	-0.39722
	12.6517	-0.53131	0.379204	-0.3968
	12.6525	-0.5312	0.383278	-0.39689
	12.6533	-0.53181	0.386788	-0.39692
	12.6541	-0.53295	0.389184	-0.39693
	12.655	-0.5341	0.391261	-0.39671
	12.6558	-0.5351	0.393949	-0.39601
	12.6567	-0.53502	0.396621	-0.39584
	12.6575	-0.535	0.399329	-0.39626
	12.6583	-0.53521	0.401769	-0.39617
	12.6591	-0.535	0.404154	-0.39603
	12.66	-0.53451	0.407083	-0.3959
	12.6608	-0.53377	0.408987	-0.39592
	12.6616	-0.5333	0.411877	-0.39589
	12.6625	-0.53284	0.41539	-0.39648
	12.6633	-0.53229	0.418721	-0.39646
	12.6641	-0.53267	0.423363	-0.39485
	12.665	-0.53319	0.428027	-0.39373
[truncated: 7,603 more rows]

## Sheet: Figure 2f
	Figure 2f

## Sheet: Figure 2g
	Figure 2g	Circular Dichroism (CD)
	Wavelength (nm)	IreB WT	IreB(T4E/T7E)	P-IreB
	260	-129.293	-348.313	-235.642
	259.5	-150.259	-318.762	-240.743
	259	-159.369	-334.415	-229.457
	258.5	-140.963	-298.551	-236.5
	258	-176.598	-336.666	-247.249
	257.5	-158.373	-322.645	-257.48
	257	-159.835	-379.124	-235.819
	256.5	-176.816	-361.481	-203.136
	256	-131.397	-337.83	-236.236
	255.5	-157.164	-385.133	-261.09
	255	-144.678	-405.234	-237.588
	254.5	-126.701	-365.507	-228.326
	254	-136.564	-388.697	-244.617
	253.5	-160.704	-312.181	-249.047
	253	-146.814	-380.757	-228.283
	252.5	-166.937	-382.525	-230.896
	252	-153.438	-402.048	-290.422
	251.5	-128.079	-413.942	-231.303
	251	-235.601	-384.483	-281.946
	250.5	-212.059	-419.886	-242.388
	250	-190.759	-370.904	-275.061
	249.5	-242.533	-450.164	-286.558
	249	-275.391	-441.333	-245.35
	248.5	-212.796	-463.365	-312.083
	248	-226.655	-473.92	-353.242
	247.5	-289.838	-532.487	-337.57
	247	-300.708	-581.221	-344.397
	246.5	-320.868	-512.874	-368.56
	246	-345.109	-540.336	-440.624
	245.5	-400.603	-606.18	-407.006
	245	-460.077	-733.868	-446.229
	244.5	-512.984	-733.01	-482.196
	244	-557.153	-780.736	-570.656
	243.5	-636.951	-812.972	-631.329
	243	-736.613	-825.777	-675.691
	242.5	-798.297	-1008.21	-742.692
	242	-851.665	-1105.27	-778.342
	241.5	-989.162	-1276.72	-907.066
	241	-1181.63	-1363.86	-993.249
	240.5	-1274.11	-1471.23	-1106.45
	240	-1403.79	-1660.56	-1237.92
	239.5	-1610.08	-1826.13	-1386.42
	239	-1777.87	-1951.47	-1515.72
	238.5	-1993.14	-2201.81	-1733.09
	238	-2219.37	-2344.88	-1911.82
	237.5	-2457.54	-2641.2	-2125.05
	237	-2718.78	-2848.29	-2405.14
	236.5	-3020.4	-3152.65	-2679.87
	236	-3228.75	-3461	-2948.73
	235.5	-3597.16	-3684.34	-3244.94
	235	-3918.55	-4111.47	-3615.44
	234.5	-4329.96	-4421.06	-4023.84
	234	-4745.93	-4853.4	-4367.3
	233.5	-5145.2	-5261.37	-4800.53
	233	-5570.84	-5598.04	-5264.14
	232.5	-6091.59	-6124.05	-5769.27
	232	-6487.11	-6617.82	-6280.01
	231.5	-6986.67	-7064.51	-6812.95
	231	-7449.81	-7530.07	-7275.41
	230.5	-8062.3	-8045.83	-7745.55
	230	-8574.79	-8543.45	-8325.76
	229.5	-9097.88	-9001.53	-8878.31
	229	-9549.52	-9516.83	-9348.73
	228.5	-10219.5	-9985.97	-9960.63
	228	-10594.8	-10514.1	-10431
	227.5	-11028.6	-11019.9	-10972.5
	227	-11598.4	-11378.6	-11321.9
	226.5	-12037	-11867.8	-11875.3
	226	-12398.7	-12259.5	-12304.3
	225.5	-12819.3	-12531.3	-12686.4
	225	-13170.3	-12923.5	-13064.6
	224.5	-13557.3	-13281.7	-13362.8
	224	-13780.6	-13570.2	-13684.9
	223.5	-14002.9	-13816.4	-13838.5
	223	-14317.7	-14021.3	-14070
	222.5	-14480.1	-14197.1	-14322.4
	222	-14657.8	-14376.9	-14423
	221.5	-14740.9	-14480.3	-14508.8
	221	-14895.4	-14511.2	-14548.2
	220.5	-14939.3	-14689.3	-14654.2
	220	-14995.1	-14728.9	-14657
	219.5	-15090.5	-14832.8	-14623.2
	219	-15050.7	-14732.6	-14651.8
	218.5	-15121.5	-14774.3	-14731.3
	218	-15003.7	-14757.6	-14673.4
	217.5	-15011	-14823.7	-14734.5
	217	-15071.8	-14710.9	-14776.4
	216.5	-14957.4	-14791.9	-14840.5
	216	-14999.6	-14751.9	-14920.4
	215.5	-14982.5	-14765.6	-14898.9
	215	-15000.1	-14826.3	-15092
	214.5	-15105.5	-14759.4	-15085.7
	214	-15028.1	-14907.1	-15248.2
	213.5	-15316.4	-14951.5	-15499.7
	213	-15402.4	-15039.2	-15796.6
	212.5	-15473.5	-15205.3	-16051.9
	212	-15946.5	-15551.8	-16319.6
	211.5	-15973.7	-15733.1	-16767.4
	211	-16419.7	-16005.7	-17365.9
	210.5	-16707.2	-16447.2	-17656
	210	-17045	-16890.3	-18251.9
	209.5	-17282.4	-17170.5	-18736.8
	209	-17553	-17386.2	-19123.8
	208.5	-17490.9	-17540.6	-19450
	208	-17645.5	-17286.7	-19801.5
	207.5	-17719.4	-16875.5	-19283.1
	207	-16897.5	-16574.5	-18871.1
	206.5	-16079.6	-15913.3	-18569.1
	206	-14999.9	-15555.7	-17592.8
	205.5	-14145.9	-13854.9	-16511.1
	205	-12618	-12916.8	-15383.1
	204.5	-10674.1	-11784.2	-13654.8
	204	-9805.92	-10017.6	-12133.2
	203.5	-7793.98	-6550.9	-10268
	203	-4452.96	-4775.81	-6036.51
	202.5	-3604.94	-4981.17	-3279.29
	202	-1359.69	-366.625	-769.832
	201.5	3854.73	-40.0006	145.993
	201	10505	10050	10067.1
	200.5	11259	11500	12709.9
	200	8329.1	4104.59	7642.8

## Sheet: Figure 3a
	Figure 3a	Relative Fluorescence Intensity
		WT	ΔmurA	ΔmurZ	ΔmurAΔireB	ΔmurZΔireB	murZ TM
		36.249	32.557	27.921	49.1	30.032	53.96
		31.3588	31.8319	29.3125	47.352	28.182	49.14
		32.3588	34.2635	30.2	48.159	29.021	49.9

[truncated: 29 more sheets: Figure 3c, Figure 3d, Figure 3e, Figure 3f, Figure 3g, Figure 3h, Figure 3i, Figure 4a, Figure 4d, Figure 5e, Figure 5i, Supplementary Figure 1a, Supplementary Figure 2a, Supplementary Figure 2b, Supplementary Figure 2c, Supplementary Figure 2d, Supplementary Figure 2f, Supplementary Figure 2g, Supplementary Figure 3, Supplementary Figure 4 …]
