# Supplementary material
Source: Research Square preprint supplement (doi:10.21203/rs.3.rs-9591596/v1)
Supplement: Supplementary file 2 [file ba917dc6540ef6fe0d6bd381.pdf]

**Supplementary table 5**

| <b>Primer</b>                                   | <b>Sequence (5' to 3')</b>                              | <b>Product Name</b> | <b>Template</b> |
|-------------------------------------------------|---------------------------------------------------------|---------------------|-----------------|
| For IreB expression in pET22b                   |                                                         |                     |                 |
| P1-F                                            | ACTTTAAGAAGGAGATATACATATGGGATTTACCGAAGAAACCG            | P1                  | WT              |
| P1-R                                            | GGTGGTGGTGCTCGAGGAGGTCAATCCCATTCCCTTT                   |                     |                 |
| For STKcat expression in pET42a                 |                                                         |                     |                 |
| P2-F                                            | GGATATCGGGGATCCATTCAAATCGGTAAGATCTTTG                   | P2                  | WT              |
| P2-R                                            | GGTGGTGGTGCTCGAGGCGTGTACGTATGCCTGGCC                    |                     |                 |
| For STP expression in pET22b                    |                                                         |                     |                 |
| P3-F                                            | ACTTTAAGAAGGAGATATACATATGGAAATTGCATTACTTACTG            | P3                  | WT              |
| P3-R                                            | GGTGGTGGTGCTCGAGCCTAGCCTCCTCCGTAATG                     |                     |                 |
| For introducing T4A mutation into P1            |                                                         |                     |                 |
| P4-F                                            | GAAAACGAACGGTTTCTTCGGCAAATCCCATATGTATATC                | P4                  | P1              |
| P4-R                                            | GATATACATATGGGATTTGCCGAAGAAACCGTTCGTTTTTC               |                     |                 |
| For introducing T7A mutation into P1            |                                                         |                     |                 |
| P5-F                                            | CATCTAGGCGAAAACGAACGGCTTCTTCGGTAAATCCCAT                | P5                  | P1              |
| P5-R                                            | ATGGGATTTACCGAAGAAGCCGTTTCGTTTTTCGCCTAGATG              |                     |                 |
| For introducing T4A and T7A mutations into P1   |                                                         |                     |                 |
| P6-F                                            | CTAGGCGAAAACGAACGGCTTCTTCGGCAAATCCCATATGTATAT           | P6                  | P1              |
| P6-R                                            | ATATACATATGGGATTTGCCGAAGAAGCCGTTTCGTTTTTCGCCTAG         |                     |                 |
| For introducing T4E and T7E mutations into P1   |                                                         |                     |                 |
| P7-F                                            | CTAGGCGAAAACGAACTTCTTCTTCTTCAAATCCCATATGTATAT           | P7                  | P1              |
| P7-R                                            | ATATACATATGGGATTTGAAGAAGAAGAAGTTTCGTTTTTCGCCTAG         |                     |                 |
| For IreB-GFP expression in pET22b               |                                                         |                     |                 |
| P9-F                                            | ACTTTAAGAAGGAGATATACATATGGGATTTACCGAAGAAACCG            | P9                  | PIG             |
| P9-R                                            | GGTGGTGGTGCTCGAGCTTATAAAGCTCATCCATGCCG                  |                     |                 |
| For introducing I73R and Y80E mutations into P1 |                                                         |                     |                 |
| P10-F                                           | CATGAACGAGATGAAATCCGTGAAGAATTGGTGCCTACGAACGTAAAGGGAATG  | P10                 | P1              |
| P10-R                                           | CCATTCCCTTTACGTTCTAGCGCACCAATTCTTACGGATTTTCATCTCGTTCATG |                     |                 |
| For MurA expression in pET22b                   |                                                         |                     |                 |
| P11-F                                           | ACTTTAAGAAGGAGATATACATATGGATAACAATTATTATTACAGGTAG       | P11                 | WT              |
| P11-R                                           | GGTGGTGGTGCTCGAGTCCATTTTCATCTTCTCCAC                    |                     |                 |

|                                                           |                                                             |     |     |
|-----------------------------------------------------------|-------------------------------------------------------------|-----|-----|
| For MurZ expression in pET22b                             |                                                             |     |     |
| P12-F                                                     | ACTTTAAGAAGGAGATATACATATGAGAAAAATTGTAATTAATGGTG             | P12 | WT  |
| P12-R                                                     | GGTGGTGGTGCTCGAGATCCTCAATCAATTGAATATC                       |     |     |
| For introducing D280Y, then E259A and I265V, into P12     |                                                             |     |     |
| P13-F                                                     | GTTCCGATGACCATTTCTGAATATAGTATTTTTGTTGAAAAG                  | P13 | P12 |
| P13-R                                                     | CTTTTCAACAAAAATACTATATTCAGAAATGGTCATGCGAAC                  |     |     |
| P14-F                                                     | ATCGATAATGTCCTTTATGCACACTTAGAGAGTTACGTCGCTAAGTTGGAAGAAATC   | P14 | P13 |
| P14-R                                                     | CATTTCTTCCAACCTTAGCGACGTAACCTCTCTAAGTGTGCATAAAGGACATTATCGAT |     |     |
| For construction of P15 (pKT25::ireB)                     |                                                             |     |     |
| P15-F                                                     | GATCGGATCCCATGGGATTTACCGAAGAAAC                             | P15 | WT  |
| P15-R                                                     | GATCGGTACCCGGAGGTCAATCCCATTC                                |     |     |
| For construction of P16 (pKNT25::ireB)                    |                                                             |     |     |
| P16-F                                                     | GATCGGATCCCATGGGATTTACCGAAGAAAC                             | P16 | WT  |
| P16-R                                                     | GATCGGTACCCGGAGGTCAATCCCATTC                                |     |     |
| For construction of P17 (pUT18C::murA)                    |                                                             |     |     |
| P17-F                                                     | GATCCTGCAGGATGGATACAATTATTATTACAGGTAG                       | P17 | WT  |
| P17-R                                                     | GATCGGATCCTCTCCATTTTCATCTTCTCCACTC                          |     |     |
| For construction of P18 (pUT18::murA)                     |                                                             |     |     |
| P18-F                                                     | GATCCTGCAGGATGGATACAATTATTATTACAGGTAG                       | P18 | WT  |
| P18-R                                                     | GATCGGATCCTCTCCATTTTCATCTTCTCCACTC                          |     |     |
| For construction of P19 (pUT18C::murZ)                    |                                                             |     |     |
| P19-F                                                     | GATCGGATCCCATGAGAAAAATTGTAATTAATGGTGG                       | P19 | WT  |
| P19-R                                                     | GATCGGTACCCGATCCTCAATCAATTGAATATCTGC                        |     |     |
| For construction of P20 (pUT18::murZ)                     |                                                             |     |     |
| P20-F                                                     | GATCGGATCCCATGAGAAAAATTGTAATTAATGGTGG                       | P20 | WT  |
| P20-R                                                     | GATCGGTACCCGATCCTCAATCAATTGAATATCTGC                        |     |     |
| For construction of P21 (pUT18C::murZ(E259A/I265V/D280Y)) |                                                             |     |     |
| P21-F                                                     | GATCGGATCCCATGAGAAAAATTGTAATTAATGGTGG                       | P21 | WT  |
| P21-R                                                     | GATCGGTACCCGATCCTCAATCAATTGAATATCTGC                        |     |     |
| For construction of P22 (pUT18::murZ(E259A/I265V/D280Y))  |                                                             |     |     |
| P22-F                                                     | GATCGGATCCCATGAGAAAAATTGTAATTAATGGTGG                       | P22 | WT  |
| P22-R                                                     | GATCGGTACCCGATCCTCAATCAATTGAATATCTGC                        |     |     |

| For construction of <i>S. suis</i> mutant strains |                                                    |                    |                  |
|---------------------------------------------------|----------------------------------------------------|--------------------|------------------|
| <i>ΔireB</i> strain                               |                                                    |                    |                  |
| IreB-up1-F                                        | CTTGATGGCGGTATTGAA                                 | <i>ΔireB</i> ::PPE | WT               |
| IreB-up1-R                                        | ACTTACACCTTCTTTCCCT                                |                    |                  |
| IreB-PPE-F                                        | AGGGAAAGAAGGTGTAAGTTGTTTCGCCAGAGGCTT               |                    | PPE <sup>6</sup> |
| IreB-PPE-R                                        | ACGTCTAATCCCATTATTCTCACCAAATTCCCCGTAGGC            |                    |                  |
| IreB-dn1-F                                        | TGAGAATAATGGGATTAGACGT                             |                    | WT               |
| IreB-dn1-R                                        | TCTGCTGTTGCGTCTTCT                                 |                    |                  |
| IreB-up2-F                                        | CTTGATGGCGGTATTGAA                                 | <i>ΔireB</i>       | WT               |
| IreB-up2-R                                        | ACTTACACCTTCTTTCCCT                                |                    |                  |
| IreB-dn2-F                                        | AGGGAAAGAAGGTGTAAGTTGAGAATAATGGGATTAGACGT          |                    |                  |
| IreB-dn2-R                                        | TCTGCTGTTGCGTCTTCT                                 |                    |                  |
| <i>CΔireB</i> strain                              |                                                    |                    |                  |
| CIreB-up2-F                                       | ACAACGCCTGGTGGACG                                  | <i>CΔireB</i>      | <i>ΔireB</i> ::P |
| CIreB-up2-R                                       | ACTTACACCTTCTTTCCCT                                |                    |                  |
| CIreB-dn2-F                                       | AGGGAAAGAAGGTGTAAGTTGAGAATAATGGGATTAGACGT          |                    |                  |
| CIreB-dn2-R                                       | TGATAGGCTGGATAGTTTTGATA                            |                    |                  |
| <i>ΔmurZ</i> strain                               |                                                    |                    |                  |
| MurZ-up1-F                                        | TGTTGCTCACCCAGTTTCAGTTC                            | <i>ΔmurZ</i> ::PPE | WT               |
| MurZ-up1-R                                        | ACTACAGAAAGCCTCTGGCGAAACAACATACTTCTTAATTTGC        |                    |                  |
| MurZ-PPE-F                                        | TGTTTCGCCAGAGGCTTTCTGTAGT                          |                    | PPE              |
| MurZ-PPE-R                                        | CCAAATTCCCCGTAGGCGCTAG                             |                    |                  |
| MurZ-dn1-F                                        | CTAGCGCCTACGGGGAATTTGGAGAGTCTAATTGAGAACTACTTTCT    |                    | WT               |
| MurZ-dn1-R                                        | ATACGATTGCCAACAACACTGCTT                           |                    |                  |
| MurZ-up2-F                                        | TGTTGCTCACCCAGTTTCAGTTC                            | <i>ΔmurZ</i>       | WT               |
| MurZ-up2-R                                        | AGAAAGTAGTTCTCAATTAGACTCTACTAACATACTTCTTAATTTGC    |                    |                  |
| MurZ-dn2-F                                        | GCAAATTAAGAAAGTGAATGTTAGTAGAGTCTAATTGAGAACTACTTTCT |                    |                  |
| MurZ-dn2-R                                        | ATACGATTGCCAACAACACTGCTT                           |                    |                  |
| <i>ΔmurA</i> strain                               |                                                    |                    |                  |
| MurA-up1-F                                        | AGCCTTCGCTCACTTGGATTCA                             | <i>ΔmurA</i> ::PPE | WT               |
| MurA-up1-R                                        | TTCTTATCCTTTTCTTACTTAAATC                          |                    |                  |
| MurA-PPE-F                                        | GATTTAAGTAAGAAAAGGATAAGAATGTTTCGCCAGAGGCTT         |                    | PPE              |

|                      |                                                 |                     |     |
|----------------------|-------------------------------------------------|---------------------|-----|
| MurA-PPE-R           | CCAAATTCCCCGTAGGC                               |                     | PPE |
| MurA-dn1-F           | GCCTACGGGGAATTTGGGGATAATCTTAGCTATGTTGGTA        |                     |     |
| MurA-dn1-R           | ATCCTCCTAAATGTTTTCTACG                          | $\Delta murA$       | WT  |
| MurA-up2-F           | AGCCTTCGCTCACTTGGATTCA                          |                     |     |
| MurA-up2-R           | ACCAACATAGCTAAGATTATCCTTCTTATCCTTTTCTTACTTAAAT  |                     |     |
| MurA-dn2-F           | ATTTAAGTAAGAAAAGGATAAGAAGGATAATCTTAGCTATGTTGGT  |                     |     |
| MurA-dn2-R           | ATCCTCCTAAATGTTTTCTACG                          |                     |     |
| $\Delta stp$ strain  |                                                 |                     |     |
| STP-up1-F            | TATCCGTTCAGTATTCTGTGCCA                         | $\Delta stp :: PPE$ | WT  |
| STP-up1-R            | ACTACAGAAAGCCTCTGGCGAAACAAATTTTTATCGTTGCTAAGCAA |                     |     |
| STP-PPE-F            | TGTTTCGCCAGAGGCTTTCTGTAGT                       |                     |     |
| STP-PPE-R            | CCAAATTCCCCGTAGGCGCTAG                          |                     |     |
| STP-dn1-F            | CTAGCGCCTACGGGGAATTTGGATGATTCAAATCGGTAAGATCTT   |                     |     |
| STP-dn1-R            | CTTCGCCACTTCTTTCTTACCAG                         |                     |     |
| STP-up2-F            | TATCCGTTCAGTATTCTGTGCCA                         | $\Delta stp$        | WT  |
| STP-up2-R            | AAGATCTTACCGATTGAATCATAATTTTTATCGTTGCTAAGCAA    |                     |     |
| STP-dn2-F            | TTGCTTAGCAACGATAAAAATTATGATTCAAATCGGTAAGATCTT   |                     |     |
| STP-dn2-R            | CTTCGCCACTTCTTTCTTACCAG                         |                     |     |
| $\Delta stk$ strain  |                                                 |                     |     |
| STK-up1-F            | ATCGATGGATTTTGATTCTCTAAAGA                      | $\Delta stk :: PPE$ | WT  |
| STK-up1-R            | ACTACAGAAAGCCTCTGGCGAAACATTACCTAGCCTCCTCCGTAAT  |                     |     |
| STK-PPE-F            | TGTTTCGCCAGAGGCTTTCTGTAGT                       |                     |     |
| STK-PPE-R            | CCAAATTCCCCGTAGGCGCTAG                          |                     |     |
| STK-dn1-F            | CTAGCGCCTACGGGGAATTTGGAGATGAATAAGGTTGGGGAGAT    |                     |     |
| STK-dn1-R            | ACCTATCTTGAGAGTGGTCGTGG                         |                     |     |
| STK-up2-F            | ATCGATGGATTTTGATTCTCTAAAGA                      | $\Delta stk$        | WT  |
| STK-up2-R            | ATCTCCCCAACCTTATTCATCTTTACCTAGCCTCCTCCGTAAT     |                     |     |
| STK-dn2-F            | ATTACGGAGGAGGCTAGGTAAAGATGAATAAGGTTGGGGAGAT     |                     |     |
| STK-dn2-R            | ACCTATCTTGAGAGTGGTCGTGG                         |                     |     |
| $\Delta clpP$ strain |                                                 |                     |     |
| ClpP-up1-F           | CTGTGTATGCTTTCTTGAACGCC                         |                     | WT  |

|                      |                                                   |                     |     |
|----------------------|---------------------------------------------------|---------------------|-----|
| ClpP-up1-R           | ACTACAGAAAGCCTCTGGCGAAACAGCAGTGACAAATATGTAATAGTA  |                     | W 1 |
| ClpP-PPE-F           | TGTTTCGCCAGAGGCTTTCTGTAGT                         | $\Delta clpP$ ::PPE | PPE |
| ClpP-PPE-R           | CCAAATTCCCGTAGGCGCTAG                             |                     |     |
| ClpP-dn1-F           | CTAGCGCCTACGGGGAATTTGGAAAATTACTCCTTTTCGAGAT       |                     | WT  |
| ClpP-dn1-R           | TTCGGAAAGAGTATCCTTGTATGTC                         |                     |     |
| ClpP-up2-F           | CTGTGTATGCTTTCTTGAACGCC                           | $\Delta clpP$       |     |
| ClpP-up2-R           | ATCTCGAAAAGGAGTAATTTTGCAGTGACAAATATGTAATAGTA      |                     | WT  |
| ClpP-dn2-F           | TACTATTACATATTTGTCACTGCAAATTACTCCTTTTCGAGAT       |                     |     |
| ClpP-dn2-R           | TTCGGAAAGAGTATCCTTGTATGTC                         |                     |     |
| $\Delta clpC$ strain |                                                   |                     |     |
| ClpC-up1-F           | AGAGCCTGTCGGTAGAACAAGA                            | $\Delta clpC$ ::PPE | WT  |
| ClpC-up1-R           | ACTACAGAAAGCCTCTGGCGAAACAACCTGCTTTTCTTTTCGGCTTGCT |                     | PPE |
| ClpC-PPE-F           | TGTTTCGCCAGAGGCTTTCTGTAGT                         |                     | WT  |
| ClpC-PPE-R           | CCAAATTCCCGTAGGCGCTAG                             |                     |     |
| ClpC-dn1-F           | CTAGCGCCTACGGGGAATTTGGTCTAACTACTCCTCTTTTCTATCC    | $\Delta clpC$       | WT  |
| ClpC-dn1-R           | AGTAGATTTAGCGACCAGGAGGC                           |                     |     |
| ClpC-up2-F           | AGAGCCTGTCGGTAGAACAAGA                            |                     | WT  |
| ClpC-up2-R           | GGATAGGAAAGAGGAGTAGTTAGAACCTGCTTTTCTTTTCGGCTTGCT  |                     |     |
| ClpC-dn2-F           | AGCAAGCCGAAAGAAAAGCAGGTTCTAACTACTCCTCTTTTCTATCC   |                     |     |
| ClpC-dn2-R           | AGTAGATTTAGCGACCAGGAGGC                           |                     |     |
| $\Delta clpE$ strain |                                                   |                     |     |
| ClpE-up1-F           | GTGTGAATCGTTTGAATGGCAGC                           | $\Delta clpE$ ::PPE | WT  |
| ClpE-up1-R           | ACTACAGAAAGCCTCTGGCGAAACAGAAAATAGAGCTGCTCTCTACGA  |                     | PPE |
| ClpE-PPE-F           | TGTTTCGCCAGAGGCTTTCTGTAGT                         |                     | WT  |
| ClpE-PPE-R           | CCAAATTCCCGTAGGCGCTAG                             |                     |     |
| ClpE-dn1-F           | CTAGCGCCTACGGGGAATTTGGAATTCTACCTCTTTCTGTGAA       | $\Delta clpE$       | WT  |
| ClpE-dn1-R           | AGATACATAGGCACCCGAGTTCA                           |                     |     |
| ClpE-up2-F           | GTGTGAATCGTTTGAATGGCAGC                           |                     | WT  |
| ClpE-up2-R           | TTCACAGAAAGAGGTAGAATTGAAAATAGAGCTGCTCTCTACGA      |                     |     |
| ClpE-dn2-F           | TCGTAGAGAGCAGCTCTATTTTCAATTCTACCTCTTTCTGTGAA      |                     |     |
| ClpE-dn2-R           | AGATACATAGGCACCCGAGTTCA                           |                     |     |
| $\Delta clpX$ strain |                                                   |                     |     |

|                                                    |                                                       |                                             |     |
|----------------------------------------------------|-------------------------------------------------------|---------------------------------------------|-----|
| ClpX-up1-F                                         | TCGTTCTTGCTATTTCCAACCTTC                              | <i>ΔclpX</i> ::PPE                          | WT  |
| ClpX-up1-R                                         | ACTACAGAAAGCCTCTGGCGAAACAGTGTTTCCTCTTTCATATCTCTT      |                                             |     |
| ClpX-PPE-F                                         | TGTTTCGCCAGAGGCTTTCTGTAGT                             |                                             |     |
| ClpX-PPE-R                                         | CCAAATTCCCCGTAGGCGCTAG                                |                                             |     |
| ClpX-dn1-F                                         | CTAGCGCCTACGGGGAATTTGGAAAAATAAAGGGTGGAAACT            |                                             |     |
| ClpX-dn1-R                                         | GAATAGTCCCAGGTAGGGCGTTTA                              |                                             |     |
| ClpX-up2-F                                         | TCGTTCTTGCTATTTCCAACCTTC                              | <i>ΔclpX</i>                                | WT  |
| ClpX-up2-R                                         | AGTTTCCACCCTTTATTTTTGTGTTTCCTCTTTCATATCTCTT           |                                             |     |
| ClpX-dn2-F                                         | AAGAGATATGAAAGAGGAAACACAAAAATAAAGGGTGGAAACT           |                                             |     |
| ClpX-dn2-R                                         | GAATAGTCCCAGGTAGGGCGTTTA                              |                                             |     |
| <i>ΔclpL</i> strain                                |                                                       |                                             |     |
| ClpL-up1-F                                         | TGAAAGGAGATACTTGGACCGAT                               | <i>ΔclpL</i> ::PPE                          | WT  |
| ClpL-up1-R                                         | ACTACAGAAAGCCTCTGGCGAAACAAGTTTTTACCTCGTTTCATGTTA      |                                             |     |
| ClpL-PPE-F                                         | TGTTTCGCCAGAGGCTTTCTGTAGT                             |                                             |     |
| ClpL-PPE-R                                         | CCAAATTCCCCGTAGGCGCTAG                                |                                             |     |
| ClpL-dn1-F                                         | CTAGCGCCTACGGGGAATTTGGAAATAGTGAAGAATTTGAAAAATC        |                                             |     |
| ClpL-dn1-R                                         | TGACCATCTGCCGAGAAGTTATC                               |                                             |     |
| ClpL-up2-F                                         | TGAAAGGAGATACTTGGACCGAT                               | <i>ΔclpL</i>                                | WT  |
| ClpL-up2-R                                         | GATTTTTCAAATTCCTTCACTATTTAGTTTTTACCTCGTTTCATGTTA      |                                             |     |
| ClpL-dn2-F                                         | TAACATGAAACGAGGTA AAAACTAAATAGTGAAGAATTTGAAAAATC      |                                             |     |
| ClpL-dn2-R                                         | TGACCATCTGCCGAGAAGTTATC                               |                                             |     |
| PIG (P <sub>1503</sub> :: <i>ireB-gfp</i> ) strain |                                                       |                                             |     |
| IreB-up3-F                                         | TTGAAGAAGTTGCGACCGAAG                                 | PIG (P <sub>1503</sub> :: <i>ireB-gfp</i> ) | WT  |
| IreB-up3-R                                         | GAAAGCCTCTGGCGAAACA ACTTACACCTTCTTTCCCTA              |                                             |     |
| Peno-F                                             | TGTTTCGCCAGAGGCTTTC                                   |                                             | PPE |
| Peno-R                                             | CGGTTTCTTCGGTAAATCCATTATATTACTCTCCTTTGAGTT            |                                             |     |
| IreB-F                                             | ATGGGATTTACCGAAGAAACCGT                               |                                             | WT  |
| IreB-F                                             | CAGCGGAGCCAGCGGATCCGAGGTCAATCCATTCCCTTTC              |                                             |     |
| Linker-gfp-F                                       | GGATCCGCTGGCTCCGCTGCTGGTTCTGGCGAATTCATGTCAAAGGAGAAGAC |                                             | P8  |
| Linker-gfp-R                                       | TTACTTATAAAGCTCATCCATG                                |                                             |     |
| IreB-dn3-F                                         | GGCATGGATGAGCTTTATAAGTAATGAGAATAATGGGATTAGACG         |                                             | WT  |
| IreB-dn3-R                                         | ATTCATTCTCCCCTTGCTATTT                                |                                             |     |

|                                                                         |                                                |                                                                     |                                                                     |
|-------------------------------------------------------------------------|------------------------------------------------|---------------------------------------------------------------------|---------------------------------------------------------------------|
| IreB-up3-F                                                              | TTGAAGAAGTTGCGACCGAAG                          | IG( <i>ireB-gfp</i> )                                               | WT                                                                  |
| IreB-up3-R                                                              | GAAAGCCTCTGGCGAAACAACCTTACACCTTCTTTCCCTAT      |                                                                     | PIG                                                                 |
| IreB-Linker-gfp-F                                                       | TGTTTCGCCAGAGGCTTTC                            |                                                                     |                                                                     |
| IreB-Linker-gfp-R                                                       | TTACTTATAAAGCTCATCCATGCC                       |                                                                     | WT                                                                  |
| IreB-dn3-F                                                              | GGCATGGATGAGCTTTATAAGTAATGAGAATAATGGGATTAGACG  |                                                                     |                                                                     |
| IreB-dn3-R                                                              | ATTCATTCCCTCCCCTTGCTATTT                       |                                                                     |                                                                     |
| PI(I73R/Y80E)G (P <sub>1503</sub> :: <i>ireB(I73RY80E)-gfp</i> ) strain |                                                |                                                                     |                                                                     |
| IreB(I73R/Y80E)-up1-F                                                   | ATAGGTGTGTATGAAGTTGTTTAGT                      | <i>ireB(I73R/Y80E)</i>                                              | WT                                                                  |
| IreB(I73R/Y80E)-up1-R                                                   | ACGGTTTCTTCGGTAAATCCCATACTTACACCTTCTTTCCCTATT  |                                                                     | P9                                                                  |
| I73RY80E-F                                                              | ATGGGATTTACCGAAGAAACCGT                        |                                                                     | WT                                                                  |
| I73RY80E-R                                                              | TTCGTAGCGCACCAATTCTTCA                         |                                                                     |                                                                     |
| IreB(I73R/Y80E)-dn1-F                                                   | GGAATGGGATTGACCTCTAATGAGAATAATGGGATTAGACGTC    |                                                                     | PI(I73R/Y80E)G<br>(P <sub>1503</sub> :: <i>ireB(I73RY80E)-gfp</i> ) |
| IreB(I73R/Y80E)-dn1-R                                                   | TCTTACCAAACCTCTTCTTGACCGT                      | PIG                                                                 |                                                                     |
| IreB(I73R/Y80E)-up1-F                                                   | ATAGGTGTGTATGAAGTTGTTTAGT                      | PI(I73R/Y80E)G<br>(P <sub>1503</sub> :: <i>ireB(I73RY80E)-gfp</i> ) | P9                                                                  |
| IreB(I73R/Y80E)-up1-R                                                   | CGGTTTCTTCGGTAAATCCCATTATATTACTCTCCTTTGAGTT    |                                                                     | WT                                                                  |
| I73RY80E-F                                                              | ATGGGATTTACCGAAGAAACCGT                        |                                                                     |                                                                     |
| I73RY80E-R                                                              | TTCGTAGCGCACCAATTCTTCA                         |                                                                     |                                                                     |
| IreB(I73R/Y80E)-dn1-F                                                   | GGAATGGGATTGACCTCTAATGAGAATAATGGGATTAGACGTC    |                                                                     |                                                                     |
| IreB(I73R/Y80E)-dn1-R                                                   | TCTTACCAAACCTCTTCTTGACCGT                      |                                                                     |                                                                     |
| <i>ireB(T4A/T7A)</i> strain                                             |                                                |                                                                     |                                                                     |
| IreB-up4-F                                                              | TTGAAGAAGTTGCGACCGAAG                          | <i>ireB(T4A/T7A)</i>                                                | WT                                                                  |
| IreB-up4-R                                                              | ACTTACACCTTCTTTCCCTAT                          |                                                                     | P6                                                                  |
| IreB-T4A/T7A-F                                                          | ATAGGGAAAGAAGGTGTAAGTATGGGATTTGCCGAAGAAGCCG    |                                                                     |                                                                     |
| IreB-T4A/T7A-R                                                          | CGTCTAATCCCATTATTCTCATTAGAGGTCAATCCCATTCCCTTTC |                                                                     | WT                                                                  |
| IreB-dn4-F                                                              | TGAGAATAATGGGATTAGACG                          |                                                                     |                                                                     |
| IreB-dn4-R                                                              | ATTCATTCCCTCCCCTTGCTATTT                       |                                                                     |                                                                     |
| <i>ireB(T4E/T7E)</i> strain                                             |                                                |                                                                     |                                                                     |
| IreB-up4-F                                                              | TTGAAGAAGTTGCGACCGAAG                          | <i>ireB(T4E/T7E)</i>                                                | WT                                                                  |
| IreB-up4-R                                                              | ACTTACACCTTCTTTCCCTAT                          |                                                                     | P7                                                                  |
| IreB-T4E/T7E-F                                                          | ATAGGGAAAGAAGGTGTAAGTATGGGATTTGAAGAAGAAGAAG    |                                                                     |                                                                     |
| IreB-T4E/T7E-R                                                          | CGTCTAATCCCATTATTCTCATTAGAGGTCAATCCCATTCCCTTTC |                                                                     | WT                                                                  |
| IreB-dn4-F                                                              | TGAGAATAATGGGATTAGACG                          |                                                                     |                                                                     |

|                                                                        |                                                |                                                                 |                  |
|------------------------------------------------------------------------|------------------------------------------------|-----------------------------------------------------------------|------------------|
| IreB-dn4-R                                                             | ATTCATTCTCCCCTTGCTATTT                         |                                                                 | WT               |
| PIG-TA(P <sub>1503</sub> - <i>ireB(T4A/T7A)</i> - <i>gfp</i> ) strain  |                                                |                                                                 |                  |
| IreB-up4-F                                                             | TTGAAGAAGTTGCGACCGAAG                          | PIG-TA (P <sub>1503</sub> - <i>ireB(T4A/T7A)</i> - <i>gfp</i> ) | WT               |
| IreB-up4-R                                                             | ACTTACACCTTCTTTCCCTAT                          |                                                                 |                  |
| IreB-T4A/T7A-F                                                         | ATAGGGAAAGAAGGTGTAAGTATGGGATTTGCCGAAGAAGCCG    |                                                                 | P6               |
| IreB-T4A/T7A-R                                                         | CGTCTAATCCCATTATTCTCATTAGAGGTCAATCCCATTCCCTTTC |                                                                 |                  |
| IreB-dn4-F                                                             | TGAGAATAATGGGATTAGACG                          |                                                                 | WT               |
| IreB-dn4-R                                                             | ATTCATTCTCCCCTTGCTATTT                         |                                                                 |                  |
| PIG-TE (P <sub>1503</sub> - <i>ireB(T4E/T7E)</i> - <i>gfp</i> ) strain |                                                |                                                                 |                  |
| IreB-up4-F                                                             | TTGAAGAAGTTGCGACCGAAG                          | PIG-TE(P <sub>1503</sub> - <i>ireB(T4E/T7E)</i> - <i>gfp</i> )  | WT               |
| IreB-up4-R                                                             | ACTTACACCTTCTTTCCCTAT                          |                                                                 |                  |
| IreB-T4E/T7E-F                                                         | ATAGGGAAAGAAGGTGTAAGTATGGGATTTGAAGAAGAAGAAG    |                                                                 | P7               |
| IreB-T4E/T7E-R                                                         | CGTCTAATCCCATTATTCTCATTAGAGGTCAATCCCATTCCCTTTC |                                                                 |                  |
| IreB-dn4-F                                                             | TGAGAATAATGGGATTAGACG                          |                                                                 | WT               |
| IreB-dn4-R                                                             | ATTCATTCTCCCCTTGCTATTT                         |                                                                 |                  |
| PIG $\Delta$ <i>stk</i> strain                                         |                                                |                                                                 |                  |
| STK-up1-F                                                              | ATCGATGGATTTTGATTCTCTAAAGA                     | PIG $\Delta$ <i>stk</i> ::PPE                                   | WT               |
| STK-up1-R                                                              | ACTACAGAAAGCCTCTGGCGAAACATTACCTAGCCTCCTCCGTAAT |                                                                 |                  |
| STK-PPE-F                                                              | TGTTTCGCCAGAGGCTTTCTGTAGT                      |                                                                 | PPE              |
| STK-PPE-R                                                              | CCAAATTCCCCGTAGGCGCTAG                         |                                                                 |                  |
| STK-dn1-F                                                              | CTAGCGCCTACGGGAATTTGGAGATGAATAAGGTTGGGGAGAT    |                                                                 | WT               |
| STK-dn1-R                                                              | ACCTATCTTGAGAGTGGTCGTGG                        |                                                                 |                  |
| STK-up2-F                                                              | ATCGATGGATTTTGATTCTCTAAAGA                     | PIG $\Delta$ <i>stk</i>                                         | WT               |
| STK-up2-R                                                              | ATCTCCCCAACCTTATTCATCTTTACCTAGCCTCCTCCGTAAT    |                                                                 |                  |
| STK-dn2-F                                                              | ATTACGGAGGAGGCTAGGTAAAGATGAATAAGGTTGGGGAGAT    |                                                                 |                  |
| STK-dn2-R                                                              | ACCTATCTTGAGAGTGGTCGTGG                        |                                                                 |                  |
| PIG $\Delta$ <i>stp</i> strain                                         |                                                |                                                                 |                  |
| STP-up1-F                                                              | TATCCGTTTCAGTATTCTGTGCCA                       | PIG $\Delta$ <i>stp</i> ::PPE                                   | WT               |
| STP-up1-R                                                              | ACTACAGAAAGCCTCTGGCGAAACAAATTTTATCGTTGCTAAGCAA |                                                                 |                  |
| STP-PPE-F                                                              | TGTTTCGCCAGAGGCTTTCTGTAGT                      |                                                                 | PPE <sup>2</sup> |
| STP-PPE-R                                                              | CCAAATTCCCCGTAGGCGCTAG                         |                                                                 |                  |

|                                    |                                                |                                   |     |
|------------------------------------|------------------------------------------------|-----------------------------------|-----|
| STP-dn1-F                          | CTAGCGCCTACGGGGAATTTGGATGATTCAAATCGGTAAGATCTT  |                                   | WT  |
| STP-dn1-R                          | CTTCGCCACTTCTTTCTTACCAG                        |                                   |     |
| STP-up2-F                          | TATCCGTTCAAGTATTCTGTGCCA                       | PIG $\Delta$ stp                  | WT  |
| STP-up2-R                          | AAGATCTTACCGATTTGAATCATAATTTTATCGTTGCTAAGCAA   |                                   |     |
| STP-dn2-F                          | TTGCTTAGCAACGATAAAAATTATGATTCAAATCGGTAAGATCTT  |                                   |     |
| STP-dn2-R                          | CTTCGCCACTTCTTTCTTACCAG                        |                                   |     |
| PIG-TE $\Delta$ stk strain         |                                                |                                   |     |
| STK-up1-F                          | ATCGATGGATTTTGATTCTCTAAAGA                     | PIG-TE $\Delta$ stk ::PPE         | WT  |
| STK-up1-R                          | ACTACAGAAAGCCTCTGGCGAAACATTACCTAGCCTCCTCCGTAAT |                                   |     |
| STK-PPE-F                          | TGTTTCGCCAGAGGCTTTCTGTAGT                      |                                   | PPE |
| STK-PPE-R                          | CCAAATCCCCGTAGGCGCTAG                          |                                   |     |
| STK-dn1-F                          | CTAGCGCCTACGGGGAATTTGGAGATGAATAAGGTTGGGGAGAT   |                                   | WT  |
| STK-dn1-R                          | ACCTATCTTGAGAGTGGTCGTGG                        |                                   |     |
| STK-up2-F                          | ATCGATGGATTTTGATTCTCTAAAGA                     | PIG-TE $\Delta$ stk               | WT  |
| STK-up2-R                          | ATCTCCCCAACCTTATTCATCTTTACCTAGCCTCCTCCGTAAT    |                                   |     |
| STK-dn2-F                          | ATTACGGAGGAGGCTAGGTAAAGATGAATAAGGTTGGGGAGAT    |                                   |     |
| STK-dn2-R                          | ACCTATCTTGAGAGTGGTCGTGG                        |                                   |     |
| $\Delta$ murA $\Delta$ ireB strain |                                                |                                   |     |
| IreB-up1-F                         | CTTGATGGCGGTATTGAA                             | $\Delta$ murA $\Delta$ ireB ::PPE | WT  |
| IreB-up1-R                         | ACTTACACCTTCTTTCCCT                            |                                   |     |
| IreB-PPE-F                         | AGGGAAAGAAGGTGTAAGTTGTTTCGCCAGAGGCTT           |                                   | PPE |
| IreB-PPE-R                         | ACGTCTAATCCATTATTCTCACCAAATCCCCGTAGGC          |                                   |     |
| IreB-dn1-F                         | TGAGAATAATGGGATTAGACGT                         |                                   | WT  |
| IreB-dn1-R                         | TCTGCTGTTGCGTCTTCT                             |                                   |     |
| IreB-up2-F                         | CTTGATGGCGGTATTGAA                             | $\Delta$ murA $\Delta$ ireB       | WT  |
| IreB-up2-R                         | ACTTACACCTTCTTTCCCT                            |                                   |     |
| IreB-dn2-F                         | AGGGAAAGAAGGTGTAAGTTGAGAATAATGGGATTAGACGT      |                                   |     |
| IreB-dn2-R                         | TCTGCTGTTGCGTCTTCT                             |                                   |     |
| $\Delta$ murZ $\Delta$ ireB strain |                                                |                                   |     |
| IreB-up1-F                         | CTTGATGGCGGTATTGAA                             | $\Delta$ murZ $\Delta$ ireB ::PPE | WT  |
| IreB-up1-R                         | ACTTACACCTTCTTTCCCT                            |                                   |     |
| IreB-PPE-F                         | AGGGAAAGAAGGTGTAAGTTGTTTCGCCAGAGGCTT           |                                   | PPE |

|            |                                                  |                    |    |
|------------|--------------------------------------------------|--------------------|----|
| IreB-PPE-R | <b>ACGTCTAATCCCATTATTCTCACCAAATTCCCCGTAGGC</b>   | <i>ΔmurZ ΔireB</i> |    |
| IreB-dn1-F | TGAGAATAATGGGATTAGACGT                           |                    | WT |
| IreB-dn1-R | TCTGCTGTTGCGTCTTCT                               | <i>ΔmurZ ΔireB</i> |    |
| IreB-up2-F | CTTGATGGCGGTATTGAA                               |                    |    |
| IreB-up2-R | ACTTACACCTTCTTCCCT                               |                    | WT |
| IreB-dn2-F | <b>AGGGAAAGAAGGTGTAAGTTGAGAATAATGGGATTAGACGT</b> |                    |    |
| IreB-dn2-R | TCTGCTGTTGCGTCTTCT                               |                    |    |

Note: Bold nucleotides indicate the overlapping regions designed for overlap extension PCR to assemble the target DNA fragments. Underlined sequences denote the codons for amino acid substitutions introduced by site-directed mutagenesis.
